# Supplementary material for: Exploring the biomarkers and therapeutic mechanism of kidney-yang deficiency syndrome treated by You-gui pill using systems pharmacology and serum metabonomics
Source: Royal Society of Chemistry journal article supplement (doi:10.1039/c7ra12451a), 2018-01-01
Supplement: c7ra12451a1.pdf [file c7ra12451a1.pdf]

## Exploring the Biomarkers and Therapeutic Mechanism of Kidney-Yang Deficiency Syndrome Treated by You-gui Pill Using the Systems Pharmacology and Serum Metabonomics

Ruiqun Chen, Jia Wang, Chengbin Liao, Lei Zhang, Qian Guo and Xiufeng Wang\*

School of Basic Courses, Guangdong Pharmaceutical University, Guangzhou 510006, P. R. China. E-mail: wxfsnow8012@126.com; Fax: +86-20-39352187; Tel: +86-20-39352195

**Table S1** The active compounds screened from YGP's nine Chinese herbs by TCMSP

| Herb                                                   | MOL ID    | Molecule Name                                      | OB(%)<br>≥30 | BBB>0<br>.3 | DL ≥0<br>.18 | HL<br>≥4  | Pubchem<br>Cid |
|--------------------------------------------------------|-----------|----------------------------------------------------|--------------|-------------|--------------|-----------|----------------|
| <b>SDH</b> ( <i>Radix Rehmanniae Preparata</i> )       | MOL000359 | sitosterol                                         | 36.91        | 0.87        | 0.75         | 5.37      | 12303645       |
|                                                        | MOL000449 | Stigmasterol                                       | 43.83        | 1           | 0.76         | 5.57      | 5280794        |
| <b>FZ</b> ( <i>Radix Aconiti Lateralis Preparata</i> ) | MOL002211 | 11,14-eicosadienoic acid                           | 39.99        | 0.76        | 0.2          | 5.6       | 5282805        |
|                                                        | MOL002398 | Karanjin                                           | 69.56        | 0.62        | 0.34         | 13.1<br>5 | 100633         |
|                                                        | MOL000359 | sitosterol                                         | 36.91        | 0.87        | 0.75         | 5.37      | 12303645       |
| <b>SY</b> ( <i>Rhizoma Dioscoreae</i> )                | MOL005435 | 24-Methylcholest-5-enyl-3beta-O-glucopyranoside_qt | 37.58        | 0.96        | 0.72         | 4.91      | N/A            |
|                                                        | MOL005438 | campesterol                                        | 37.58        | 0.95        | 0.71         | 4.83      | 5283637        |
|                                                        | MOL000953 | CLR                                                | 43.78        | 1.13        | 0.68         | 4.52      | 5997           |
|                                                        | MOL000310 | Denudatin B                                        | 61.47        | 0.35        | 0.38         | 7.71      | 442834         |
|                                                        | MOL005440 | Isofucosterol                                      | 43.78        | 0.97        | 0.76         | 5.18      | 5281326        |
|                                                        | MOL000322 | Kadsurenone                                        | 54.72        | 0.52        | 0.38         | 9.16      | 122159         |
|                                                        | MOL000449 | Stigmasterol                                       | 43.83        | 1           | 0.76         | 5.57      | 5280794        |
| <b>SZY</b> ( <i>Macrocarpium Officinale</i> )          | MOL005481 | 2,6,10,14,18-pentamethylcosa-2,6,10,14,18-pentaene | 33.4         | 1.99        | 0.24         | 6.05      | 5366013        |
|                                                        | MOL005486 | 3,4-Dehydrolycopen-16-al                           | 46.64        | 0.6         | 0.49         | 4.29      | 5316458        |
|                                                        | MOL000358 | beta-sitosterol                                    | 36.91        | 0.99        | 0.75         | 5.36      | 222284         |
|                                                        | MOL001495 | Ethyl linolenate                                   | 46.1         | 1.12        | 0.2          | 6.2       | 6371716        |
|                                                        | MOL002883 | Ethyl oleate (NF)                                  | 32.4         | 1.1         | 0.19         | 4.85      | 5363269        |
|                                                        | MOL005557 | lanosta-8,24-dien-3-ol,3-acetate                   | 44.3         | 1.31        | 0.82         | 7.21      | N/A            |
|                                                        | MOL001494 | Mandenol                                           | 42           | 1.14        | 0.19         | 5.39      | 5282184        |
|                                                        | MOL001771 | poriferast-5-en-3beta-ol                           | 36.91        | 1.14        | 0.75         | 5.07      | 457801         |
|                                                        | MOL000359 | sitosterol                                         | 36.91        | 0.87        | 0.75         | 5.37      | 12303645       |
|                                                        | MOL000449 | Stigmasterol                                       | 43.83        | 1           | 0.76         | 5.57      | 5280794        |
|                                                        | MOL008457 | Tetrahydroalstonine                                | 32.42        | 0.33        | 0.81         | 10.5      | N/A            |

|                                     |           |                                                                |       |      |      |      |         |
|-------------------------------------|-----------|----------------------------------------------------------------|-------|------|------|------|---------|
|                                     |           |                                                                |       |      |      | 5    |         |
| <b>TSZ (<i>Cuscuta reflexa</i>)</b> | MOL000358 | beta-sitosterol                                                | 36.91 | 0.99 | 0.75 | 5.36 | 222284  |
|                                     | MOL005043 | campest-5-en-3beta-ol                                          | 37.58 | 0.94 | 0.71 | 4.43 | 173183  |
|                                     | MOL000953 | CLR                                                            | 37.87 | 1.13 | 0.68 | 4.52 | 5997    |
|                                     | MOL005440 | Isofucosterol                                                  | 43.78 | 0.97 | 0.76 | 5.18 | 5281326 |
|                                     | MOL005944 | matrine                                                        | 63.77 | 1.52 | 0.25 | 6.69 | N/A     |
|                                     | MOL000184 | NSC63551                                                       | 39.25 | 1.22 | 0.76 | 5.78 | 5356634 |
|                                     | MOL006649 | sophranol                                                      | 55.42 | 0.68 | 0.28 | 4.94 | N/A     |
| <b>GQ (<i>Lycium Barbarum</i>)</b>  | MOL009612 | (24R)-4alpha-Methyl-24-ethylcholesta-7,25-dien-3beta-ylacetate | 46.36 | 1    | 0.84 | 8.25 | N/A     |
|                                     | MOL009656 | (E,E)-1-ethyl octadeca-3,13-dienoate                           | 42    | 1.11 | 0.19 | 5.47 | N/A     |
|                                     | MOL009604 | 14b-pregnane                                                   | 34.78 | 1.95 | 0.34 | 4.57 | N/A     |
|                                     | MOL009617 | 24-ethylcholest-22-enol                                        | 37.09 | 0.99 | 0.75 | 5.32 | N/A     |
|                                     | MOL009618 | 24-ethylcholesta-5,22-dienol                                   | 43.83 | 0.84 | 0.76 | 5.76 | N/A     |
|                                     | MOL009620 | 24-methyl-31-norlanost-9(11)-enol                              | 38    | 0.93 | 0.75 | 5.49 | 5319735 |
|                                     | MOL009621 | 24-methylenolanost-8-enol                                      | 42.37 | 1.18 | 0.77 | 5.43 | 634628  |
|                                     | MOL007449 | 24-methylidenlophenol                                          | 44.19 | 1    | 0.75 | 5.1  | 5283640 |
|                                     | MOL009631 | 31-norcyclolaudenol                                            | 38.68 | 0.94 | 0.81 | 4.88 | N/A     |
|                                     | MOL009633 | 31-norlanost-9(11)-enol                                        | 38.35 | 1.03 | 0.72 | 5.37 | N/A     |
|                                     | MOL009634 | 31-norlanosterol                                               | 42.2  | 1.03 | 0.73 | 5.27 | N/A     |
|                                     | MOL009635 | 4,24-methyllophenol                                            | 37.83 | 1.1  | 0.75 | 4.9  | N/A     |
|                                     | MOL009642 | 4alpha-methyl-24-ethylcholesta-7,24-dienol                     | 42.3  | 1.08 | 0.78 | 5.83 | N/A     |
|                                     | MOL009640 | 4alpha,14alpha,24-trimethylcholesta-8,24-dienol                | 38.91 | 1.06 | 0.76 | 6.67 | N/A     |
|                                     | MOL009641 | 4alpha,24-dimethylcholesta-7,24-dienol                         | 42.65 | 0.98 | 0.75 | 5.44 | N/A     |
|                                     | MOL009644 | 6-Fluoroindole-7-Dehydrocholesterol                            | 43.73 | 0.54 | 0.72 | 5.1  | N/A     |
|                                     | MOL009650 | Atropine                                                       | 42.16 | 0.39 | 0.19 | 5.27 | 637577  |
|                                     | MOL000358 | beta-sitosterol                                                | 36.91 | 0.99 | 0.75 | 5.36 | 222284  |
|                                     | MOL005438 | campesterol                                                    | 37.58 | 0.95 | 0.71 | 4.83 | N/A     |
|                                     | MOL000953 | CLR                                                            | 37.87 | 1.13 | 0.68 | 4.52 | 5997    |
|                                     | MOL003578 | Cycloartenol                                                   | 38.69 | 1.33 | 0.78 | 5    | N/A     |
|                                     | MOL009653 | Cycloeucaenol                                                  | 39.73 | 1.04 | 0.79 | 5.01 | N/A     |
|                                     | MOL008173 | daucosterol_qt                                                 | 36.91 | 0.85 | 0.75 | 5.6  | N/A     |
|                                     | MOL001495 | Ethyl linolenate                                               | 46.1  | 1.12 | 0.2  | 6.2  | 6371716 |
|                                     | MOL009622 | Fucosterol                                                     | 43.78 | 1.01 | 0.76 | 5.44 | 5281328 |
|                                     | MOL001979 | LAN                                                            | 42.12 | 1.18 | 0.75 | 5.84 | 246983  |
|                                     | MOL009677 | lanost-8-en-3beta-ol                                           | 34.23 | 1.25 | 0.74 | 5.48 | 440560  |

|                                                                    |           |                         |       |       |      |           |         |
|--------------------------------------------------------------------|-----------|-------------------------|-------|-------|------|-----------|---------|
|                                                                    | MOL009678 | lanost-8-enol           | 34.23 | 1.12  | 0.74 | 6.41      | N/A     |
|                                                                    | MOL009639 | Lophenol                | 38.13 | 1.1   | 0.71 | 4.76      | 160482  |
|                                                                    | MOL001494 | Mandenol                | 42    | 1.14  | 0.19 | 5.39      | 5282184 |
|                                                                    | MOL009681 | Obtusifoliol            | 42.55 | 1.25  | 0.76 | 5.91      | 65252   |
|                                                                    | MOL001323 | Sitosterol alpha1       | 43.28 | 0.97  | 0.78 | 5.64      | 9548595 |
|                                                                    | MOL000449 | Stigmasterol            | 43.83 | 1     | 0.76 | 5.57      | 5280794 |
|                                                                    | MOL002223 | TAU                     | 24.37 | -2.75 | 0.01 | N/A       | 4068592 |
|                                                                    | MOL000430 | Betaine                 | 40.92 | -1.31 | 0.01 | 10.7<br>8 | 248     |
| <b>DZ (Cortex<br/>Eucommiae)</b>                                   | MOL009015 | (-)-Tabernemontanine    | 58.67 | 0.36  | 0.61 | 19.7<br>3 | N/A     |
|                                                                    | MOL002773 | beta-carotene           | 37.18 | 1.52  | 0.58 | 4.36      | 5280489 |
|                                                                    | MOL000358 | beta-sitosterol         | 36.91 | 0.99  | 0.75 | 5.36      | 222284  |
|                                                                    | MOL000443 | Erythraline             | 49.18 | 0.55  | 0.55 | 11.1<br>1 | N/A     |
| <b>DG (Radix<br/>Angelicae<br/>Sinensis)</b>                       | MOL000358 | beta-sitosterol         | 36.91 | 0.99  | 0.75 | 5.36      | 222284  |
|                                                                    | MOL000449 | Stigmasterol            | 43.83 | 1     | 0.76 | 5.57      | 5280794 |
| <b>RG<br/>(Cinnamomi<br/>cortex)</b>                               | MOL000991 | Cinnamaldehyde          | 31.99 | 1.48  | 0.02 | 4.73      | 637511  |
|                                                                    | MOL002225 | Styrone                 | 38.35 | 1.09  | 0.02 | 4.38      | 5315892 |
|                                                                    | MOL000118 | (L)-alpha-Terpineol     | 48.8  | 1.72  | 0.03 | 11.3<br>5 | 443162  |
|                                                                    | MOL002003 | (-)-Caryophyllene oxide | 32.67 | 1.76  | 0.13 | 6.51      | N/A     |
|                                                                    | MOL000193 | (Z)-caryophyllene       | 30.29 | 2.15  | 0.09 | 8         | 6429301 |
|                                                                    | MOL003047 | [(1S)-endo]-(-)-Borneol | 83.54 | 1.43  | 0.05 | 11.3<br>3 | 1201518 |
| _qt: the residue of saccharide after desaccharify (i.e., aglycone) |           |                         |       |       |      |           |         |

**Table S2 Potential target proteins predicted by PharmMapper**

| Active compound            | Fit   | Norm Fit | z-score  | Name of target proteins                          | Uniprot ID  |
|----------------------------|-------|----------|----------|--------------------------------------------------|-------------|
| <b>(L)-alpha-Terpineol</b> | 2.981 | 0.5962   | 1.57626  | Corticosteroid 11-beta-dehydrogenase isozyme 1   | P28845      |
|                            | 2.993 | 0.4276   | 1.42131  | Beta-secretase 1                                 | BACE1_HUMAN |
|                            | 2.936 | 0.5872   | 1.29723  | Mitogen-activated protein kinase 14              | Q16539      |
|                            | 2.944 | 0.5887   | 1.03352  | Tyrosine-protein phosphatase non-receptor type 1 | PTN1_HUMAN  |
|                            | 2.823 | 0.5646   | 0.813401 | Carbonic anhydrase 2                             | CAH2_HUMAN  |
| <b>(Z)-caryophyllene</b>   | 4.118 | 0.5883   | 2.94197  | Retinoic acid receptor gamma                     | RARG_HUMAN  |

|                                |        |          |                                                                            |                                |             |
|--------------------------------|--------|----------|----------------------------------------------------------------------------|--------------------------------|-------------|
|                                |        |          |                                                                            | MAN                            |             |
| 3.934                          | 0.5619 | 2.49172  | Retinoic acid receptor RXR-alpha                                           | RXRA_HUMAN                     |             |
| 3.885                          | 0.5549 | 2.37535  | Peroxisome proliferator-activated receptor gamma                           | PPARG_HUMAN                    |             |
| 3.664                          | 0.7329 | 2.2187   | Alpha-tocopherol transfer protein                                          | P49638                         |             |
| 3.597                          | 0.5994 | 2.10954  | Cell division protein kinase 2                                             | P24941                         |             |
| 3.987                          | 0.5696 | 1.78163  | Sulfotransferase family cytosolic 2B member 1                              | O00204                         |             |
| 4.163                          | 0.4625 | 1.75578  | Retinoic acid receptor beta                                                | RARB_HUMAN                     |             |
| 3.654                          | 0.6091 | 1.72878  | Glutathione S-transferase A1                                               | P08263                         |             |
| 3.671                          | 0.4589 | 1.52394  | Caspase-3                                                                  | CASP3_HUMAN                    |             |
| 3.627                          | 0.6045 | 1.46724  | Adenosine kinase                                                           | P55263                         |             |
| 3.42                           | 0.5701 | 1.39578  | NAD(P)H dehydrogenase [quinone] 1                                          | NQO1_HUMAN                     |             |
| 3.447                          | 0.4925 | 1.29212  | Protein farnesyltransferase/geranylgeranyltransferase type-1 subunit alpha | FNTA_HUMAN                     |             |
| 3.881                          | 0.4851 | 1.23549  | Glucocorticoid receptor                                                    | GCR_HUMAN                      |             |
| 3.659                          | 0.5228 | 1.18167  | Fatty acid-binding protein, heart                                          | FABPH_HUMAN                    |             |
| 3.317                          | 0.5529 | 1.01258  | Nuclear receptor subfamily 1 group I member 3                              | NR1I3_HUMAN                    |             |
| 3.589                          | 0.5127 | 1.00472  | Gastrotropin                                                               | FABP6_HUMAN                    |             |
| 3.422                          | 0.5703 | 0.975928 | Glutathione-requiring prostaglandin D synthase                             | PTGD2_HUMAN                    |             |
| 3.504                          | 0.4381 | 0.942729 | Angiotensin-1 receptor                                                     | TIE2_HUMAN                     |             |
| 3.395                          | 0.5658 | 0.918916 | E3 ubiquitin-protein ligase Mdm2                                           | MDM2_HUMAN                     |             |
| 3.293                          | 0.8233 | 0.875285 | Vitamin D-binding protein                                                  | VTDB_HUMAN                     |             |
| 3.33                           | 0.4757 | 0.852318 | Cyclin-A2                                                                  | CCNA2_HUMAN                    |             |
| <b>[(1S)-endo]-(-)-Borneol</b> | 4.34   | 0.7233   | 1.67192                                                                    | Cell division protein kinase 2 | P24941      |
|                                | 4.144  | 0.5921   | 1.50468                                                                    | Collagenase 3                  | MMP13_HUMAN |

|  |       |        |         |                                                           |             |
|--|-------|--------|---------|-----------------------------------------------------------|-------------|
|  | 4.33  | 0.7217 | 1.41921 | Nuclear receptor subfamily 1<br>group I member 3          | NR1I3_HUMAN |
|  | 3.977 | 0.9943 | 1.36361 | Liver carboxylesterase 1                                  | EST1_HUMAN  |
|  | 3.913 | 0.6522 | 1.34751 | cAMP-dependent protein kinase<br>catalytic subunit alpha  | P00517      |
|  | 4.481 | 0.5602 | 1.32274 | Proto-oncogene tyrosine-protein<br>kinase ABL1            | P00519      |
|  | 5.096 | 0.5096 | 1.32022 | Nuclear receptor ROR-alpha                                | RORA_HUMAN  |
|  | 4     | 0.8    | 1.3172  | Dipeptidyl peptidase 4                                    | DPP4_HUMAN  |
|  | 3.835 | 0.9587 | 1.24744 | Estradiol 17-beta-dehydrogenase<br>1                      | P14061      |
|  | 3.915 | 0.7829 | 1.24525 | Aldo-keto reductase family 1<br>member C3                 | AK1C3_HUMAN |
|  | 4     | 0.8    | 1.23863 | Aldo-keto reductase family 1<br>member C1                 | Q04828      |
|  | 3.926 | 0.7852 | 1.22668 | Catenin alpha-1                                           | CTNA1_HUMAN |
|  | 4.041 | 0.5772 | 1.21034 | cAMP-dependent protein kinase,<br>alpha-catalytic subunit | P00517      |
|  | 3.779 | 0.7558 | 1.20684 | Vascular endothelial growth<br>factor receptor 2          | P35968      |
|  | 3.908 | 0.977  | 1.19304 | Androgen receptor                                         | ANDR_HUMAN  |
|  | 3.797 | 0.9494 | 1.19084 | Dual specificity protein<br>phosphatase 6                 | DUS6_HUMAN  |
|  | 4.471 | 0.5589 | 1.17696 | Caspase-3                                                 | CASP3_HUMAN |
|  | 4.36  | 0.545  | 1.17218 | Interleukin-2                                             | IL2_HUMAN   |
|  | 4.296 | 0.6137 | 1.15784 | Retinoic acid receptor gamma                              | RARG_HUMAN  |
|  | 4.44  | 0.6342 | 1.14059 | Corticosteroid 11-beta-<br>dehydrogenase isozyme 1        | DHI1_HUMAN  |
|  | 4.171 | 0.5959 | 1.07931 | Peroxisome proliferator-activated<br>receptor gamma       | PPARG_HUMAN |
|  | 4     | 0.8    | 1.07737 | Alpha-tocopherol transfer protein                         | P49638      |
|  | 4.07  | 0.5815 | 1.06542 | Bile acid receptor                                        | NR1H4_HUMAN |

|                               |       |        |          |                                                         |                 |
|-------------------------------|-------|--------|----------|---------------------------------------------------------|-----------------|
|                               | 4.494 | 0.5617 | 1.05571  | Ferrochelatase, mitochondrial                           | P22830          |
|                               | 4.039 | 0.6732 | 1.0546   | NAD(P)H dehydrogenase<br>[quinone] 1                    | NQO1_HU<br>MAN  |
|                               | 4.235 | 0.7058 | 1.04732  | Glutathione S-transferase A1                            | P08263          |
|                               | 3.985 | 0.7971 | 1.00616  | Kinesin-like protein KIF11                              | KIF11_HU<br>MAN |
|                               | 4.295 | 0.6136 | 1.00537  | B-Raf proto-oncogene<br>serine/threonine-protein kinase | BRAF1_HU<br>MAN |
|                               | 4.292 | 0.7153 | 1.00433  | Glutathione-requiring<br>prostaglandin D synthase       | PTGD2_HU<br>MAN |
|                               | 3.677 | 0.7355 | 0.999554 | Serine/threonine-protein kinase<br>PAK 7                | PAK7_HU<br>MAN  |
|                               | 3.769 | 0.7539 | 0.993826 | Estrogen receptor                                       | ESR1_HUM<br>AN  |
|                               | 4.44  | 0.555  | 0.990837 | Retinoic acid receptor alpha                            | RARA_HU<br>MAN  |
|                               | 4.13  | 0.6883 | 0.914888 | Serum albumin                                           | ALBU_HU<br>MAN  |
|                               | 4.467 | 0.6381 | 0.867713 | Sulfotransferase family cytosolic<br>2B member 1        | O00204          |
|                               | 4.408 | 0.6297 | 0.861558 | Glutathione S-transferase P                             | GSTP1_HU<br>MAN |
|                               | 3.995 | 0.5707 | 0.826918 | Mitogen-activated protein kinase<br>1                   | MK01_HU<br>MAN  |
|                               | 3.731 | 0.6218 | 0.825349 | Aldose reductase                                        | ALDR_HU<br>MAN  |
|                               | 4.408 | 0.6298 | 0.818552 | Gastrotropin                                            | FABP6_HU<br>MAN |
|                               | 4.04  | 0.5772 | 0.805515 | Retinoic acid receptor RXR-<br>alpha                    | RXRA_HU<br>MAN  |
|                               | 4.034 | 0.5043 | 0.80213  | Stromelysin-1                                           | MMP3_HU<br>MAN  |
| <b>24-methylidenelophenol</b> | 4.46  | 0.8921 | 2.44713  | Estradiol 17-beta-dehydrogenase<br>1                    | P14061          |
|                               | 4.28  | 0.7134 | 2.20276  | Trafficking protein particle<br>complex subunit 3       | O43617          |
|                               | 4.336 | 0.6194 | 2.1858   | Cytochrome P450 2C8                                     | CP2C8_HU<br>MAN |
|                               | 3.793 | 0.6321 | 2.15051  | Ganglioside GM2 activator                               | P17900          |
|                               | 3.869 | 0.7738 | 2.09768  | Bile acid receptor                                      | NR1H4_HU<br>MAN |

|  |       |        |         |                                                            |             |
|--|-------|--------|---------|------------------------------------------------------------|-------------|
|  | 4.197 | 0.8394 | 2.07024 | SEC14-like protein 2                                       | O76054      |
|  | 3.684 | 0.9209 | 2.06568 | Nuclear receptor ROR-alpha                                 | RORA_HUMAN  |
|  | 3.638 | 0.7276 | 1.93886 | Alcohol dehydrogenase 1C                                   | P00326      |
|  | 3.688 | 0.922  | 1.91665 | Progesterone receptor                                      | PRGR_HUMAN  |
|  | 3.905 | 0.7811 | 1.90802 | Calmodulin                                                 | CALM_HUMAN  |
|  | 4.293 | 0.477  | 1.8773  | Retinoic acid receptor gamma                               | RARG_HUMAN  |
|  | 3.616 | 0.904  | 1.81349 | Mineralocorticoid receptor                                 | MCR_HUMAN   |
|  | 3.808 | 0.6346 | 1.80746 | Oxysterols receptor LXR-beta                               | NR1H2_HUMAN |
|  | 3.915 | 0.7829 | 1.76398 | Corticosteroid 11-beta-dehydrogenase isozyme 1             | DH11_HUMAN  |
|  | 5.258 | 0.6572 | 1.74528 | Retinol-binding protein 4                                  | RET4_HUMAN  |
|  | 3.8   | 0.4222 | 1.73201 | Phosphatidylinositol 3-kinase regulatory subunit alpha     | P85A_HUMAN  |
|  | 4.387 | 0.6268 | 1.71441 | Sulfotransferase family cytosolic 2B member 1              | O00204      |
|  | 4.063 | 0.5804 | 1.69981 | Lanosterol synthase                                        | ERG7_HUMAN  |
|  | 3.845 | 0.5492 | 1.62223 | 72 kDa type IV collagenase                                 | MMP2_HUMAN  |
|  | 4.036 | 0.6727 | 1.60704 | Glutathione-requiring prostaglandin D synthase             | PTGD2_HUMAN |
|  | 4.325 | 0.7209 | 1.57376 | Sex hormone-binding globulin                               | SHBG_HUMAN  |
|  | 3.628 | 0.7257 | 1.5702  | Aldo-keto reductase family 1 member C1                     | Q04828      |
|  | 4.744 | 0.5271 | 1.49297 | Dual specificity mitogen-activated protein kinase kinase 1 | MP2K1_HUMAN |
|  | 3.739 | 0.7479 | 1.49189 | Tyrosine-protein phosphatase non-receptor type 11          | PTN11_HUMAN |
|  | 4.106 | 0.5132 | 1.46498 | Ferrochelatase, mitochondrial                              | P22830      |
|  | 3.711 | 0.6185 | 1.43814 | Oxysterols receptor LXR-alpha                              | NR1H3_HUMAN |
|  | 3.525 | 0.705  | 1.40421 | cAMP-dependent protein kinase catalytic subunit alpha      | P00517      |

|  |       |        |          |                                                                  |             |
|--|-------|--------|----------|------------------------------------------------------------------|-------------|
|  | 3.945 | 0.4931 | 1.3943   | Caspase-3                                                        | CASP3_HUMAN |
|  | 3.827 | 0.6378 | 1.38493  | Tyrosine-protein kinase SYK                                      | KSYK_HUMAN  |
|  | 3.46  | 0.692  | 1.36976  | Glutathione S-transferase P                                      | GSTP1_HUMAN |
|  | 3.42  | 0.855  | 1.27706  | Collagenase 3                                                    | MMP13_HUMAN |
|  | 4.067 | 0.5809 | 1.26404  | Gastrotropin                                                     | FABP6_HUMAN |
|  | 3.437 | 0.6874 | 1.25802  | Dipeptidyl peptidase 4                                           | DPP4_HUMAN  |
|  | 3.991 | 0.5701 | 1.25734  | Estrogen sulfotransferase                                        | ST1E1_HUMAN |
|  | 3.681 | 0.5258 | 1.24592  | Interleukin-2                                                    | IL2_HUMAN   |
|  | 4.219 | 0.4219 | 1.19237  | Vitamin D3 receptor                                              | VDR_HUMAN   |
|  | 3.904 | 0.488  | 1.15581  | Retinoic acid receptor alpha                                     | RARA_HUMAN  |
|  | 4.21  | 0.4677 | 1.12278  | Retinoic acid receptor beta                                      | RARB_HUMAN  |
|  | 5.789 | 0.5789 | 1.11325  | Cellular retinoic acid-binding protein 2                         | P29373      |
|  | 3.679 | 0.6132 | 1.09797  | Glutathione S-transferase A1                                     | P08263      |
|  | 3.703 | 0.4628 | 1.07395  | Proto-oncogene tyrosine-protein kinase ABL1                      | P00519      |
|  | 3.588 | 0.7177 | 1.07101  | Wiskott-Aldrich syndrome protein                                 | WASP_HUMAN  |
|  | 3.743 | 0.6239 | 1.04988  | Adenosine kinase                                                 | P55263      |
|  | 3.457 | 0.5762 | 1.0104   | Flavin reductase                                                 | P30043      |
|  | 3.558 | 0.8894 | 0.992235 | Vitamin D-binding protein                                        | VTDB_HUMAN  |
|  | 3.937 | 0.3028 | 0.988948 | Endothelial protein C receptor                                   | EPCR_HUMAN  |
|  | 3.784 | 0.6306 | 0.979143 | Alcohol dehydrogenase class-3                                    | ADHX_HUMAN  |
|  | 4.072 | 0.3702 | 0.971697 | Serine/threonine-protein phosphatase PP1-gamma catalytic subunit | P36873      |
|  | 3.298 | 0.6596 | 0.967547 | Steroid hormone receptor ERR1                                    | P11474      |



|                      |       |        |          |                                                                      |             |
|----------------------|-------|--------|----------|----------------------------------------------------------------------|-------------|
|                      | 3.994 | 0.5705 | 0.965136 | Fatty acid-binding protein, brain                                    | FABP7_HUMAN |
|                      | 3.689 | 0.4099 | 0.839516 | Growth factor receptor-bound protein 2                               | GRB2_HUMAN  |
|                      | 3.715 | 0.5307 | 0.816262 | Hepatocyte nuclear factor 4-gamma                                    | Q14541      |
| <b>beta-carotene</b> | 7.764 | 0.9705 | 3.50164  | Retinol-binding protein 4                                            | RET4_HUMAN  |
|                      | 5.157 | 0.6446 | 2.6582   | Caspase-3                                                            | CASP3_HUMAN |
|                      | 4.565 | 0.7609 | 2.51984  | ADAM 17                                                              | ADA17_HUMAN |
|                      | 5.238 | 0.403  | 2.19371  | Endothelial protein C receptor                                       | EPCR_HUMAN  |
|                      | 4.697 | 0.671  | 2.12558  | Retinoic acid receptor gamma                                         | RARG_HUMAN  |
|                      | 4.822 | 0.6889 | 2.12104  | Cytochrome P450 2C8                                                  | CP2C8_HUMAN |
|                      | 4.481 | 0.7468 | 2.03589  | Aldose reductase                                                     | ALDR_HUMAN  |
|                      | 4.736 | 0.7894 | 1.94415  | Glutathione-requiring prostaglandin D synthase                       | PTGD2_HUMAN |
|                      | 4.678 | 0.5848 | 1.92629  | Proto-oncogene tyrosine-protein kinase ABL1                          | P00519      |
|                      | 4.185 | 0.837  | 1.79232  | Bile acid receptor                                                   | NR1H4_HUMAN |
|                      | 4.552 | 0.7587 | 1.79058  | Trafficking protein particle complex subunit 3                       | O43617      |
|                      | 5.225 | 0.5806 | 1.74393  | Retinoic acid receptor beta                                          | RARB_HUMAN  |
|                      | 5.175 | 0.6469 | 1.68983  | Glucocorticoid receptor                                              | GCR_HUMAN   |
|                      | 4     | 0.6667 | 1.62991  | Peroxisome proliferator-activated receptor delta                     | PPARD_HUMAN |
|                      | 4.903 | 0.7004 | 1.56835  | Fatty acid-binding protein, brain                                    | FABP7_HUMAN |
|                      | 4.523 | 0.7538 | 1.55198  | Carbonic anhydrase 2                                                 | CAH2_HUMAN  |
|                      | 4.353 | 0.7255 | 1.45942  | [Pyruvate dehydrogenase [lipoamide]] kinase isozyme 2, mitochondrial | PDK2_HUMAN  |
|                      | 4     | 0.5714 | 1.45272  | 3-hydroxy-3-methylglutaryl-                                          | HMDH_HUMAN  |

|       |        |          |                                                            |             |
|-------|--------|----------|------------------------------------------------------------|-------------|
|       |        |          | coenzyme A reductase                                       | MAN         |
| 4.532 | 0.6474 | 1.40545  | Hepatocyte nuclear factor 4-gamma                          | Q14541      |
| 5.145 | 0.5717 | 1.29648  | Dual specificity mitogen-activated protein kinase kinase 1 | MP2K1_HUMAN |
| 4.534 | 0.6477 | 1.27572  | Fatty acid-binding protein, heart                          | FABPH_HUMAN |
| 4.713 | 0.5892 | 1.26275  | Basic fibroblast growth factor receptor 1                  | FGFR1_HUMAN |
| 6.752 | 0.6752 | 1.26104  | Cellular retinoic acid-binding protein 2                   | P29373      |
| 4.465 | 0.6378 | 1.25022  | Estrogen sulfotransferase                                  | ST1E1_HUMAN |
| 4.197 | 0.8394 | 1.20654  | SEC14-like protein 2                                       | O76054      |
| 3.731 | 0.9329 | 1.17688  | Nuclear receptor ROR-alpha                                 | RORA_HUMAN  |
| 4.017 | 0.6696 | 1.15771  | Mitogen-activated protein kinase 10                        | P53779      |
| 4     | 0.5714 | 1.12362  | 72 kDa type IV collagenase                                 | MMP2_HUMAN  |
| 4     | 0.8    | 1.11593  | Tyrosine-protein phosphatase non-receptor type 11          | PTN11_HUMAN |
| 3.975 | 0.7951 | 1.09521  | Calmodulin                                                 | CALM_HUMAN  |
| 3.87  | 0.645  | 1.08324  | Poly [ADP-ribose] polymerase 1                             | P09874      |
| 3.697 | 0.7393 | 1.02593  | E3 ubiquitin-protein ligase Mdm2                           | MDM2_HUMAN  |
| 4.624 | 0.4204 | 1.02151  | Phosphatidylcholine transfer protein                       | Q9UKL6      |
| 4.169 | 0.6948 | 1.0159   | Adenosine kinase                                           | P55263      |
| 3.718 | 0.7437 | 0.99698  | Dipeptidyl peptidase 4                                     | DPP4_HUMAN  |
| 4.106 | 0.5866 | 0.974521 | Lanosterol synthase                                        | ERG7_HUMAN  |
| 3.938 | 0.6563 | 0.969188 | Nuclear receptor subfamily 1 group 1 member 3              | NR1I3_HUMAN |
| 3.644 | 0.9111 | 0.965844 | Cell division protein kinase 2                             | P24941      |
| 3.732 | 0.7465 | 0.959513 | cAMP-dependent protein kinase catalytic subunit alpha      | P00517      |
| 4.164 | 0.4627 | 0.955637 | Serine/threonine-protein phosphatase PP1-gamma             | P36873      |

|                |       |        |            |                                                                 |             |
|----------------|-------|--------|------------|-----------------------------------------------------------------|-------------|
|                |       |        |            | catalytic subunit                                               |             |
|                | 3.836 | 0.6394 | 0.950185   | Flavin reductase                                                | P30043      |
|                | 3.744 | 0.7488 | 0.935588   | Vascular endothelial growth factor receptor 2                   | P35968      |
|                | 3.886 | 0.6476 | 0.907668   | Oxysterols receptor LXR-alpha                                   | NR1H3_HUMAN |
|                | 3.654 | 0.609  | 0.894117   | Ganglioside GM2 activator                                       | P17900      |
|                | 3.811 | 0.4764 | 0.886762   | Vitamin D3 receptor                                             | VDR_HUMAN   |
|                | 3.815 | 0.6359 | 0.870472   | Receptor tyrosine-protein kinase erbB-4                         | ERBB4_HUMAN |
|                | 4.811 | 0.4811 | 0.858882   | Retinoic acid receptor RXR-beta                                 | RXRβ_HUMAN  |
|                | 3.622 | 0.9056 | 0.851415   | Mitogen-activated protein kinase 14                             | Q16539      |
|                | 3.854 | 0.7707 | 0.838113   | Prothrombin                                                     | THRB_HUMAN  |
|                | 3.966 | 0.6611 | 0.82961    | Glutathione S-transferase A1                                    | P08263      |
|                | 4.408 | 0.551  | 0.82659    | Histamine N-methyltransferase                                   | P50135      |
|                | 3.78  | 0.63   | 0.826106   | Tyrosine-protein phosphatase non-receptor type 1                | PTN1_HUMAN  |
|                | 3.668 | 0.7337 | 0.821063   | Aldo-keto reductase family 1 member C1                          | Q04828      |
|                | 3.628 | 0.7256 | 0.813768   | Glutathione S-transferase P                                     | GSTP1_HUMAN |
|                | 3.862 | 0.5517 | 0.80421    | Interleukin-2                                                   | IL2_HUMAN   |
| <b>betaine</b> | 3.438 | 0.3438 | 0.63133    | Sulfotransferase family cytosolic 2B member 1                   | O00204      |
|                | 2.645 | 0.5291 | 0.540883   | Complement component C8 gamma chain                             | P07360      |
|                | 2.734 | 0.3417 | 0.414054   | Ornithine aminotransferase, mitochondrial                       | OAT_HUMAN   |
|                | 2.691 | 0.299  | 0.30178    | Bifunctional heparan sulfate N-deacetylase/N-sulfotransferase 1 | P52848      |
|                | 2.656 | 0.332  | 0.0310912  | Pyruvate kinase isozymes R/L                                    | KPYR_HUMAN  |
|                | 2.622 | 0.3746 | -0.0211379 | Cystathionine beta-synthase                                     | P35520      |
|                | 2.7   | 0.27   | -          | Nuclear receptor ROR-alpha                                      | RORA_HUMAN  |

|                        |       |        |               |                                                  |             |
|------------------------|-------|--------|---------------|--------------------------------------------------|-------------|
|                        |       |        | 0.066972<br>5 |                                                  | MAN         |
|                        | 2.827 | 0.1885 | -0.406964     | GTPase HRas                                      | RASH_HUMAN  |
|                        | 2.254 | 0.2049 | -0.979351     | Glutathione S-transferase P                      | GSTP1_HUMAN |
|                        | 2.129 | 0.3042 | -1.11439      | Heat shock 70 kDa protein 1                      | P08107      |
|                        | 2.285 | 0.2285 | -1.15144      | Eukaryotic translation initiation factor 4E      | P06730      |
|                        | 2.236 | 0.559  | -1.20921      | Proto-oncogene tyrosine-protein kinase Src       | SRC_HUMAN   |
|                        | 2.101 | 0.4202 | -1.53595      | Tyrosine-protein phosphatase non-receptor type 1 | PTN1_HUMAN  |
| <b>beta-sitosterol</b> | 4.634 | 0.9268 | 2.81101       | Estradiol 17-beta-dehydrogenase 1                | P14061      |
|                        | 4.544 | 0.9087 | 2.78011       | SEC14-like protein 2                             | O76054      |
|                        | 3.822 | 0.9555 | 2.29261       | Progesterone receptor                            | PRGR_HUMAN  |
|                        | 3.777 | 0.9443 | 2.16035       | Mineralocorticoid receptor                       | MCR_HUMAN   |
|                        | 3.657 | 0.9143 | 2.00799       | Nuclear receptor ROR-alpha                       | RORA_HUMAN  |
|                        | 4.145 | 0.6909 | 1.97081       | Trafficking protein particle complex subunit 3   | O43617      |
|                        | 4.18  | 0.5972 | 1.9412        | Lanosterol synthase                              | ERG7_HUMAN  |
|                        | 3.707 | 0.9268 | 1.93272       | Collagenase 3                                    | MMP13_HUMAN |
|                        | 3.734 | 0.7468 | 1.9228        | Cell division protein kinase 2                   | P24941      |
|                        | 4.19  | 0.5238 | 1.89654       | Caspase-3                                        | CASP3_HUMAN |
|                        | 3.928 | 0.6547 | 1.8857        | Nuclear receptor subfamily 1 group I member 3    | NR1I3_HUMAN |
|                        | 4.46  | 0.6371 | 1.85349       | Sulfotransferase family cytosolic 2B member 1    | O00204      |
|                        | 3.71  | 0.742  | 1.73461       | Bile acid receptor                               | NR1H4_HUMAN |
|                        | 3.734 | 0.7467 | 1.66682       | Androgen receptor                                | ANDR_HUMAN  |
|                        | 4.177 | 0.5967 | 1.66366       | Hepatocyte nuclear factor 4-gamma                | Q14541      |

|  |       |        |         |                                                            |             |
|--|-------|--------|---------|------------------------------------------------------------|-------------|
|  | 3.755 | 0.4173 | 1.64121 | Phosphatidylinositol 3-kinase regulatory subunit alpha     | P85A_HUMAN  |
|  | 4.192 | 0.5241 | 1.62492 | Ferrochelatase, mitochondrial                              | P22830      |
|  | 4.239 | 0.5299 | 1.62305 | Retinoic acid receptor gamma                               | RARG_HUMAN  |
|  | 4.019 | 0.6698 | 1.59619 | Glutathione-requiring prostaglandin D synthase             | PTGD2_HUMAN |
|  | 4.322 | 0.7204 | 1.59286 | Sex hormone-binding globulin                               | SHBG_HUMAN  |
|  | 3.903 | 0.6506 | 1.5715  | Glutathione S-transferase A1                               | P08263      |
|  | 5.046 | 0.6307 | 1.5483  | Retinol-binding protein 4                                  | RET4_HUMAN  |
|  | 3.75  | 0.6251 | 1.54055 | Oxysterols receptor LXR-alpha                              | NR1H3_HUMAN |
|  | 3.946 | 0.5637 | 1.47763 | Cytochrome P450 2C8                                        | CP2C8_HUMAN |
|  | 4.703 | 0.5226 | 1.47021 | Dual specificity mitogen-activated protein kinase kinase 1 | MP2K1_HUMAN |
|  | 3.707 | 0.7413 | 1.46111 | Calmodulin                                                 | CALM_HUMAN  |
|  | 4.169 | 0.5955 | 1.44663 | Gastrotropin                                               | FABP6_HUMAN |
|  | 3.482 | 0.5804 | 1.4284  | Peroxisome proliferator-activated receptor delta           | PPARD_HUMAN |
|  | 4.187 | 0.3221 | 1.42386 | Endothelial protein C receptor                             | EPCR_HUMAN  |
|  | 3.669 | 0.7337 | 1.41053 | Prothrombin                                                | THRB_HUMAN  |
|  | 3.74  | 0.7481 | 1.39333 | Corticosteroid 11-beta-dehydrogenase isozyme 1             | DH11_HUMAN  |
|  | 3.661 | 0.6101 | 1.37026 | NAD(P)H dehydrogenase [quinone] 1                          | NQO1_HUMAN  |
|  | 3.71  | 0.6184 | 1.35393 | Ephrin type-B receptor 4                                   | EPHB4_HUMAN |
|  | 3.884 | 0.6473 | 1.34656 | Adenosine kinase                                           | P55263      |
|  | 3.482 | 0.6964 | 1.33394 | Dipeptidyl peptidase 4                                     | DPP4_HUMAN  |
|  | 3.679 | 0.5256 | 1.32281 | 72 kDa type IV collagenase                                 | MMP2_HUMAN  |
|  | 3.66  | 0.7319 | 1.31952 | Tyrosine-protein phosphatase non-receptor type 11          | PTN11_HUMAN |

|                              |       |        |          |                                                  |             |
|------------------------------|-------|--------|----------|--------------------------------------------------|-------------|
|                              | 3.485 | 0.268  | 1.28339  | Amine oxidase [flavin-containing] A              | AOFA_HUMAN  |
|                              | 3.586 | 0.4482 | 1.25577  | Vitamin D3 receptor                              | VDR_HUMAN   |
|                              | 3.753 | 0.6256 | 1.24744  | Tyrosine-protein kinase SYK                      | KSYK_HUMAN  |
|                              | 3.648 | 0.608  | 1.19157  | Oxysterols receptor LXR-beta                     | NR1H2_HUMAN |
|                              | 3.302 | 0.8254 | 1.15543  | Bile salt sulfotransferase                       | Q06520      |
|                              | 3.96  | 0.5657 | 1.1333   | Mitogen-activated protein kinase 10              | MK10_HUMAN  |
|                              | 3.512 | 0.4389 | 1.12762  | Heat shock protein HSP 90-beta                   | P08238      |
|                              | 3.642 | 0.5203 | 1.03581  | Insulin-like growth factor IA                    | P01343      |
|                              | 3.561 | 0.5087 | 1.01689  | Interleukin-2                                    | IL2_HUMAN   |
|                              | 3.768 | 0.4186 | 1.0084   | Growth factor receptor-bound protein 2           | GRB2_HUMAN  |
|                              | 3.966 | 0.4407 | 1.00788  | Angiotensin-1 receptor                           | TIE2_HUMAN  |
|                              | 3.651 | 0.4564 | 0.98817  | Proto-oncogene tyrosine-protein kinase ABL1      | P00519      |
|                              | 3.619 | 0.517  | 0.985734 | Tyrosine-protein kinase ZAP-70                   | ZAP70_HUMAN |
|                              | 5.533 | 0.5533 | 0.961073 | Cellular retinoic acid-binding protein 2         | P29373      |
|                              | 3.433 | 0.5721 | 0.95347  | Flavin reductase                                 | P30043      |
|                              | 3.74  | 0.4156 | 0.889179 | Mast/stem cell growth factor receptor            | KIT_HUMAN   |
|                              | 3.949 | 0.5642 | 0.874001 | Lactoylglutathione lyase                         | LGUL_HUMAN  |
|                              | 3.507 | 0.8767 | 0.872717 | Vitamin D-binding protein                        | VTDB_HUMAN  |
|                              | 3.313 | 0.8282 | 0.863641 | Estrogen receptor                                | ESR1_HUMAN  |
|                              | 3.598 | 0.514  | 0.831692 | Protein kinase C theta type                      | KPCT_HUMAN  |
|                              | 3.398 | 0.5664 | 0.831259 | Peroxisome proliferator-activated receptor alpha | PPARA_HUMAN |
|                              | 3.362 | 0.6725 | 0.82951  | Alpha-tocopherol transfer protein                | P49638      |
| <b>campest-5-en-3beta-ol</b> | 4.633 | 0.9266 | 2.6347   | Estradiol 17-beta-dehydrogenase 1                | P14061      |

|  |       |        |         |                                                            |             |
|--|-------|--------|---------|------------------------------------------------------------|-------------|
|  | 3.91  | 0.9775 | 2.48791 | Nuclear receptor ROR-alpha                                 | RORA_HUMAN  |
|  | 4.455 | 0.891  | 2.43423 | SEC14-like protein 2                                       | O76054      |
|  | 4.533 | 0.5666 | 2.13007 | Retinoic acid receptor alpha                               | RARA_HUMAN  |
|  | 3.822 | 0.9556 | 2.10957 | Progesterone receptor                                      | PRGR_HUMAN  |
|  | 3.779 | 0.7557 | 2.05075 | Glutathione S-transferase P                                | GSTP1_HUMAN |
|  | 3.782 | 0.9454 | 2.03093 | Mineralocorticoid receptor                                 | MCR_HUMAN   |
|  | 4.236 | 0.706  | 1.84385 | Glutathione-requiring prostaglandin D synthase             | PTGD2_HUMAN |
|  | 3.711 | 0.7421 | 1.79628 | Histone deacetylase 8                                      | Q9BY41      |
|  | 4.13  | 0.6884 | 1.79281 | Trafficking protein particle complex subunit 3             | O43617      |
|  | 4.493 | 0.6419 | 1.76859 | Sulfotransferase family cytosolic 2B member 1              | O00204      |
|  | 3.734 | 0.7468 | 1.74688 | Dipeptidyl peptidase 4                                     | DPP4_HUMAN  |
|  | 4.193 | 0.5241 | 1.74677 | Caspase-3                                                  | CASP3_HUMAN |
|  | 3.769 | 0.7537 | 1.71744 | Bile acid receptor                                         | NR1H4_HUMAN |
|  | 4.427 | 0.7379 | 1.62111 | Sex hormone-binding globulin                               | SHBG_HUMAN  |
|  | 3.613 | 0.9034 | 1.57831 | Collagenase 3                                              | MMP13_HUMAN |
|  | 5.13  | 0.6413 | 1.5231  | Retinol-binding protein 4                                  | RET4_HUMAN  |
|  | 4.168 | 0.5954 | 1.50574 | Hepatocyte nuclear factor 4-gamma                          | Q14541      |
|  | 4.196 | 0.5245 | 1.50278 | Ferrochelatase, mitochondrial                              | P22830      |
|  | 4.09  | 0.4545 | 1.50266 | Growth factor receptor-bound protein 2                     | GRB2_HUMAN  |
|  | 4.239 | 0.5299 | 1.49282 | Retinoic acid receptor gamma                               | RARG_HUMAN  |
|  | 3.649 | 0.7297 | 1.48718 | Aldo-keto reductase family 1 member C1                     | Q04828      |
|  | 4.81  | 0.5345 | 1.48229 | Dual specificity mitogen-activated protein kinase kinase 1 | MP2K1_HUMAN |

|  |       |        |         |                                                        |             |
|--|-------|--------|---------|--------------------------------------------------------|-------------|
|  | 3.839 | 0.7678 | 1.462   | Corticosteroid 11-beta-dehydrogenase isozyme 1         | DHI1_HUMAN  |
|  | 3.861 | 0.6435 | 1.44545 | Tyrosine-protein kinase ITK/TSK                        | Q08881      |
|  | 3.796 | 0.5423 | 1.41753 | 72 kDa type IV collagenase                             | MMP2_HUMAN  |
|  | 3.716 | 0.4129 | 1.39375 | Phosphatidylinositol 3-kinase regulatory subunit alpha | P85A_HUMAN  |
|  | 3.749 | 0.6249 | 1.38744 | Oxysterols receptor LXR-alpha                          | NR1H3_HUMAN |
|  | 3.771 | 0.6284 | 1.37998 | Tyrosine-protein kinase JAK3                           | JAK3_HUMAN  |
|  | 3.859 | 0.5512 | 1.32582 | Tyrosine-protein kinase ZAP-70                         | ZAP70_HUMAN |
|  | 3.85  | 0.6417 | 1.32008 | Glutathione S-transferase A1                           | P08263      |
|  | 3.491 | 0.8727 | 1.31714 | Mitogen-activated protein kinase 14                    | Q16539      |
|  | 4.152 | 0.5932 | 1.2944  | Gastrotropin                                           | FABP6_HUMAN |
|  | 3.805 | 0.6342 | 1.28252 | Proto-oncogene tyrosine-protein kinase LCK             | LCK_HUMAN   |
|  | 3.921 | 0.6536 | 1.27855 | Adenosine kinase                                       | P55263      |
|  | 3.906 | 0.5579 | 1.26882 | Cytochrome P450 2C8                                    | CP2C8_HUMAN |
|  | 3.655 | 0.6091 | 1.23257 | NAD(P)H dehydrogenase [quinone] 1                      | NQO1_HUMAN  |
|  | 3.657 | 0.7314 | 1.19477 | Calmodulin                                             | CALM_HUMAN  |
|  | 3.663 | 0.7326 | 1.17804 | Tyrosine-protein phosphatase non-receptor type 11      | PTN11_HUMAN |
|  | 3.48  | 0.696  | 1.15836 | cAMP-dependent protein kinase catalytic subunit alpha  | P00517      |
|  | 3.932 | 0.3574 | 1.14261 | Caspase-1                                              | CASP1_HUMAN |
|  | 3.584 | 0.448  | 1.12456 | Vitamin D3 receptor                                    | VDR_HUMAN   |
|  | 3.665 | 0.6108 | 1.09111 | Oxysterols receptor LXR-beta                           | NR1H2_HUMAN |
|  | 3.801 | 0.543  | 1.08122 | Protein kinase C theta type                            | KPCT_HUMAN  |
|  | 4.047 | 0.3113 | 1.06413 | Endothelial protein C receptor                         | EPCR_HUMAN  |



|     |       |        |          |                                                |             |
|-----|-------|--------|----------|------------------------------------------------|-------------|
|     |       |        |          |                                                | MAN         |
|     | 3.302 | 0.8255 | 1.03312  | Bile salt sulfotransferase                     | Q06520      |
|     | 3.739 | 0.4674 | 1.03005  | Proto-oncogene tyrosine-protein kinase ABL1    | P00519      |
|     | 4.19  | 0.4656 | 1.00265  | Retinoic acid receptor beta                    | RARB_HUMAN  |
|     | 5.634 | 0.5634 | 0.946069 | Cellular retinoic acid-binding protein 2       | P29373      |
|     | 3.702 | 0.617  | 0.91224  | E3 ubiquitin-protein ligase Mdm2               | MDM2_HUMAN  |
|     | 3.552 | 0.7103 | 0.859482 | Wiskott-Aldrich syndrome protein               | WASP_HUMAN  |
|     | 3.541 | 0.5058 | 0.859013 | Interleukin-2                                  | IL2_HUMAN   |
|     | 3.299 | 0.6598 | 0.850569 | Steroid hormone receptor ERR1                  | P11474      |
|     | 3.324 | 0.2557 | 0.803257 | Amine oxidase [flavin-containing] A            | AOFA_HUMAN  |
| CLR | 4.634 | 0.9268 | 2.6817   | Estradiol 17-beta-dehydrogenase 1              | P14061      |
|     | 5.986 | 0.7482 | 2.46445  | Retinol-binding protein 4                      | RET4_HUMAN  |
|     | 3.867 | 0.9667 | 2.42975  | Nuclear receptor ROR-alpha                     | RORA_HUMAN  |
|     | 4.395 | 0.7325 | 2.33376  | Trafficking protein particle complex subunit 3 | O43617      |
|     | 3.873 | 0.9683 | 2.19799  | Collagenase 3                                  | MMP13_HUMAN |
|     | 3.822 | 0.9554 | 2.16179  | Progesterone receptor                          | PRGR_HUMAN  |
|     | 3.761 | 0.9402 | 2.02802  | Mineralocorticoid receptor                     | MCR_HUMAN   |
|     | 4.424 | 0.632  | 1.99686  | Hepatocyte nuclear factor 4-gamma              | Q14541      |
|     | 3.797 | 0.7595 | 1.82899  | Bile acid receptor                             | NR1H4_HUMAN |
|     | 4.112 | 0.8224 | 1.82075  | SEC14-like protein 2                           | O76054      |
|     | 4.487 | 0.641  | 1.79521  | Sulfotransferase family cytosolic 2B member 1  | O00204      |
|     | 3.889 | 0.6481 | 1.74525  | Oxysterols receptor LXR-alpha                  | NR1H3_HUMAN |
|     | 3.929 | 0.7859 | 1.70132  | Corticosteroid 11-beta-                        | DH11_HUMAN  |

|       |        |         |                                                            |             |
|-------|--------|---------|------------------------------------------------------------|-------------|
|       |        |         | dehydrogenase isozyme 1                                    | AN          |
| 3.651 | 0.7302 | 1.65235 | Steroid hormone receptor ERR1                              | P11474      |
| 4.09  | 0.5843 | 1.64625 | Cytochrome P450 2C8                                        | CP2C8_HUMAN |
| 4.416 | 0.736  | 1.63884 | Sex hormone-binding globulin                               | SHBG_HUMAN  |
| 4.049 | 0.5784 | 1.59364 | Lanosterol synthase                                        | ERG7_HUMAN  |
| 3.736 | 0.7471 | 1.58158 | Androgen receptor                                          | ANDR_HUMAN  |
| 3.578 | 0.8944 | 1.57217 | Mitogen-activated protein kinase 14                        | Q16539      |
| 4.196 | 0.5245 | 1.53766 | Ferrochelatase, mitochondrial                              | P22830      |
| 3.999 | 0.6664 | 1.47217 | Adenosine kinase                                           | P55263      |
| 3.726 | 0.414  | 1.46183 | Phosphatidylinositol 3-kinase regulatory subunit alpha     | P85A_HUMAN  |
| 3.763 | 0.7525 | 1.4518  | Tyrosine-protein phosphatase non-receptor type 11          | PTN11_HUMAN |
| 6.317 | 0.6317 | 1.43777 | Cellular retinoic acid-binding protein 2                   | P29373      |
| 3.591 | 0.7181 | 1.4024  | Aldo-keto reductase family 1 member C1                     | Q04828      |
| 3.648 | 0.608  | 1.3615  | Oxysterols receptor LXR-beta                               | NR1H2_HUMAN |
| 3.69  | 0.7381 | 1.34813 | Prothrombin                                                | THRB_HUMAN  |
| 4.156 | 0.5937 | 1.33471 | Gastrotropin                                               | FABP6_HUMAN |
| 3.535 | 0.707  | 1.33292 | cAMP-dependent protein kinase catalytic subunit alpha      | P00517      |
| 3.625 | 0.7251 | 1.31328 | Alpha-tocopherol transfer protein                          | P49638      |
| 3.706 | 0.5295 | 1.28768 | 72 kDa type IV collagenase                                 | MMP2_HUMAN  |
| 4.608 | 0.512  | 1.2647  | Dual specificity mitogen-activated protein kinase kinase 1 | MP2K1_HUMAN |
| 3.654 | 0.7308 | 1.23132 | Calmodulin                                                 | CALM_HUMAN  |
| 3.777 | 0.5395 | 1.22742 | Retinoic acid receptor gamma                               | RARG_HUMAN  |
| 3.443 | 0.6885 | 1.22254 | Glutathione S-transferase P                                | GSTP1_HUMAN |

|  |       |        |          |                                                  |             |
|--|-------|--------|----------|--------------------------------------------------|-------------|
|  | 3.839 | 0.4799 | 1.10739  | Caspase-3                                        | CASP3_HUMAN |
|  | 3.795 | 0.6325 | 1.1043   | Glutathione-requiring prostaglandin D synthase   | PTGD2_HUMAN |
|  | 3.638 | 0.9095 | 1.08919  | Vitamin D-binding protein                        | VTDB_HUMAN  |
|  | 3.71  | 0.6184 | 1.07791  | Glutathione S-transferase A1                     | P08263      |
|  | 3.302 | 0.8255 | 1.07168  | Bile salt sulfotransferase                       | Q06520      |
|  | 4.211 | 0.4679 | 1.06192  | Retinoic acid receptor beta                      | RARB_HUMAN  |
|  | 3.403 | 0.6805 | 1.05043  | Histone deacetylase 8                            | Q9BY41      |
|  | 3.513 | 0.4392 | 1.04021  | Heat shock protein HSP 90-beta                   | P08238      |
|  | 3.572 | 0.5103 | 1.02575  | Basic fibroblast growth factor receptor 1        | FGFR1_HUMAN |
|  | 3.634 | 0.6056 | 0.992895 | Tyrosine-protein kinase ITK/TSK                  | Q08881      |
|  | 4.14  | 0.3764 | 0.975245 | Phosphatidylcholine transfer protein             | Q9UKL6      |
|  | 3.489 | 0.4361 | 0.967962 | Vitamin D3 receptor                              | VDR_HUMAN   |
|  | 3.791 | 0.4212 | 0.958933 | Growth factor receptor-bound protein 2           | GRB2_HUMAN  |
|  | 3.559 | 0.5932 | 0.954278 | Tyrosine-protein kinase JAK3                     | JAK3_HUMAN  |
|  | 3.472 | 0.5787 | 0.951397 | Flavin reductase                                 | P30043      |
|  | 3.803 | 0.4754 | 0.906898 | Retinoic acid receptor alpha                     | RARA_HUMAN  |
|  | 3.923 | 0.3017 | 0.895779 | Endothelial protein C receptor                   | EPCR_HUMAN  |
|  | 3.46  | 0.5766 | 0.885193 | Peroxisome proliferator-activated receptor alpha | PPARA_HUMAN |
|  | 3.531 | 0.5044 | 0.874946 | Interleukin-2                                    | IL2_HUMAN   |
|  | 3.664 | 0.5234 | 0.871111 | Protein kinase C theta type                      | KPCT_HUMAN  |
|  | 3.582 | 0.5118 | 0.827724 | Tyrosine-protein kinase ZAP-70                   | ZAP70_HUMAN |
|  | 3.432 | 0.572  | 0.824609 | Receptor tyrosine-protein kinase erbB-4          | ERBB4_HUMAN |
|  | 3.556 | 0.5926 | 0.821566 | Proto-oncogene tyrosine-protein kinase LCK       | LCK_HUMAN   |

|                    |       |        |          |                                                               |              |
|--------------------|-------|--------|----------|---------------------------------------------------------------|--------------|
|                    | 3.976 | 0.4969 | 0.821468 | Histamine N-methyltransferase                                 | P50135       |
|                    | 3.576 | 0.5109 | 0.812765 | Insulin-like growth factor IA                                 | P01343       |
|                    | 3.95  | 0.5643 | 0.802897 | Lactoylglutathione lyase                                      | LGUL_HUMAN   |
| <b>Erythraline</b> | 3.656 | 0.5223 | 4.55052  | Peptidyl-prolyl cis-trans isomerase FKBP1A                    | FKBP1A_HUMAN |
|                    | 3.175 | 0.6351 | 3.16491  | Glycogen synthase kinase-3 beta                               | P49841       |
|                    | 2.959 | 0.4932 | 2.4533   | Peroxisome proliferator-activated receptor gamma              | PPARG_HUMAN  |
|                    | 2.856 | 0.4759 | 2.15158  | Fatty acid-binding protein, adipocyte                         | FABP4_HUMAN  |
|                    | 2.922 | 0.4869 | 2.09862  | Prothrombin                                                   | THRB_HUMAN   |
|                    | 2.85  | 0.57   | 2.05281  | Neutrophil collagenase                                        | MMP8_HUMAN   |
|                    | 2.946 | 0.5893 | 1.99344  | Mitogen-activated protein kinase 14                           | Q16539       |
|                    | 3.44  | 0.4301 | 1.96935  | Dipeptidase 1                                                 | DPEP1_HUMAN  |
|                    | 2.979 | 0.4964 | 1.95581  | Peroxisome proliferator-activated receptor alpha              | PPARA_HUMAN  |
|                    | 2.84  | 0.71   | 1.93947  | cAMP-specific 3,5-cyclic phosphodiesterase 4D                 | PDE4D_HUMAN  |
|                    | 2.912 | 0.3641 | 1.92086  | Signal transducer and activator of transcription 1-alpha/beta | STAT1_HUMAN  |
|                    | 2.784 | 0.928  | 1.88023  | Glutathione S-transferase P                                   | GSTP1_HUMAN  |
|                    | 2.804 | 0.5609 | 1.66234  | Serine protease hepsin                                        | P05981       |
|                    | 2.982 | 0.2711 | 1.6096   | Beta-secretase 1                                              | P56817       |
|                    | 2.923 | 0.5846 | 1.60178  | Sorbitol dehydrogenase                                        | DHSO_HUMAN   |
|                    | 3.197 | 0.3997 | 1.52061  | Glucokinase                                                   | HXK4_HUMAN   |
|                    | 2.713 | 0.6782 | 1.44664  | Proto-oncogene tyrosine-protein kinase LCK                    | LCK_HUMAN    |
|                    | 2.691 | 0.6728 | 1.42423  | Proto-oncogene tyrosine-protein kinase Src                    | SRC_HUMAN    |
|                    | 2.793 | 0.4655 | 1.35128  | Stromelysin-1                                                 | MMP3_HUMAN   |
|                    | 2.747 | 0.5495 | 1.3291   | Fibroblast growth factor receptor 2                           | P21802       |

|                      |       |        |          |                                                  |             |
|----------------------|-------|--------|----------|--------------------------------------------------|-------------|
|                      | 2.82  | 0.564  | 1.2905   | Transthyretin                                    | TTHY_HUMAN  |
|                      | 2.9   | 0.3222 | 1.25559  | Glutathione S-transferase Mu 2                   | GSTM2_HUMAN |
|                      | 2.631 | 0.6577 | 1.24139  | NONE                                             | NONE        |
|                      | 2.801 | 0.5601 | 1.22729  | Tyrosine-protein phosphatase non-receptor type 1 | PTNI_HUMAN  |
|                      | 2.762 | 0.3069 | 1.14704  | Bcl-2-like protein 1                             | Q07817      |
|                      | 2.912 | 0.4161 | 1.11992  | Tyrosine-protein kinase JAK2                     | JAK2_HUMAN  |
|                      | 2.782 | 0.3975 | 1.06167  | 3-phosphoinositide-dependent protein kinase 1    | PDPK1_HUMAN |
|                      | 2.734 | 0.4557 | 1.05779  | Leukocyte elastase                               | ELNE_HUMAN  |
|                      | 2.58  | 0.8599 | 1.00837  | Carbonic anhydrase 2                             | CAH2_HUMAN  |
|                      | 2.691 | 0.2691 | 1.00069  | Tryptase beta-2                                  | TRYB2_HUMAN |
|                      | 2.864 | 0.5728 | 0.976676 | Estradiol 17-beta-dehydrogenase 1                | P14061      |
|                      | 3.119 | 0.3899 | 0.921363 | Fatty acid-binding protein, heart                | FABPH_HUMAN |
|                      | 2.549 | 0.5098 | 0.839082 | Cathepsin S                                      | CATS_HUMAN  |
|                      | 2.668 | 0.4446 | 0.830901 | Heat shock protein HSP 90-alpha                  | HS90A_HUMAN |
| <b>Isofucosterol</b> | 4.634 | 0.9267 | 2.65166  | Estradiol 17-beta-dehydrogenase 1                | P14061      |
|                      | 3.951 | 0.9878 | 2.60536  | Nuclear receptor ROR-alpha                       | RORA_HUMAN  |
|                      | 3.884 | 0.7768 | 2.25273  | Histone deacetylase 8                            | Q9BY41      |
|                      | 4.46  | 0.4955 | 2.23755  | Growth factor receptor-bound protein 2           | GRB2_HUMAN  |
|                      | 4.345 | 0.869  | 2.23745  | SEC14-like protein 2                             | O76054      |
|                      | 4.299 | 0.7166 | 2.12255  | Trafficking protein particle complex subunit 3   | O43617      |
|                      | 3.822 | 0.9555 | 2.12132  | Progesterone receptor                            | PRGR_HUMAN  |
|                      | 3.776 | 0.7551 | 2.05405  | Glutathione S-transferase P                      | GSTP1_HUMAN |
|                      | 4.208 | 0.7013 | 2.05079  | Glutathione S-transferase A1                     | P08263      |

|  |       |        |         |                                                        |             |
|--|-------|--------|---------|--------------------------------------------------------|-------------|
|  | 3.783 | 0.9458 | 2.04174 | Mineralocorticoid receptor                             | MCR_HUMAN   |
|  | 4.447 | 0.6353 | 2.00914 | Hepatocyte nuclear factor 4-gamma                      | Q14541      |
|  | 4.22  | 0.6028 | 1.87813 | Lanosterol synthase                                    | ERG7_HUMAN  |
|  | 3.829 | 0.7659 | 1.86807 | Bile acid receptor                                     | NR1H4_HUMAN |
|  | 4.746 | 0.4746 | 1.84442 | Vitamin D3 receptor                                    | VDR_HUMAN   |
|  | 3.892 | 0.7783 | 1.81799 | Prothrombin                                            | THRB_HUMAN  |
|  | 4.485 | 0.6408 | 1.76791 | Sulfotransferase family cytosolic 2B member 1          | O00204      |
|  | 4.399 | 0.6284 | 1.75439 | Mitogen-activated protein kinase 10                    | MK10_HUMAN  |
|  | 3.953 | 0.7906 | 1.71983 | Corticosteroid 11-beta-dehydrogenase isozyme 1         | DH11_HUMAN  |
|  | 4.447 | 0.7411 | 1.66043 | Sex hormone-binding globulin                           | SHBG_HUMAN  |
|  | 3.85  | 0.7701 | 1.64747 | Calmodulin                                             | CALM_HUMAN  |
|  | 4.231 | 0.5289 | 1.62091 | Retinoic acid receptor alpha                           | RARA_HUMAN  |
|  | 3.866 | 0.6444 | 1.60149 | Nuclear receptor subfamily 1 group I member 3          | NR1I3_HUMAN |
|  | 3.743 | 0.7486 | 1.56607 | Androgen receptor                                      | ANDR_HUMAN  |
|  | 4.057 | 0.5795 | 1.55642 | Cytochrome P450 2C8                                    | CP2C8_HUMAN |
|  | 5.131 | 0.6413 | 1.53532 | Retinol-binding protein 4                              | RET4_HUMAN  |
|  | 4.239 | 0.5299 | 1.50291 | Retinoic acid receptor gamma                           | RARG_HUMAN  |
|  | 4.182 | 0.5228 | 1.49037 | Ferrochelatase, mitochondrial                          | P22830      |
|  | 3.722 | 0.4136 | 1.41697 | Phosphatidylinositol 3-kinase regulatory subunit alpha | P85A_HUMAN  |
|  | 4.789 | 0.4789 | 1.3769  | Retinoic acid receptor RXR-beta                        | RXRB_HUMAN  |
|  | 3.504 | 0.8759 | 1.34393 | Collagenase 3                                          | MMP13_HUMAN |

|  |       |        |          |                                                                  |             |
|--|-------|--------|----------|------------------------------------------------------------------|-------------|
|  | 3.755 | 0.6258 | 1.31953  | Ephrin type-B receptor 4                                         | EPHB4_HUMAN |
|  | 4.655 | 0.5173 | 1.30256  | Dual specificity mitogen-activated protein kinase kinase 1       | MP2K1_HUMAN |
|  | 3.735 | 0.9337 | 1.28737  | Vitamin D-binding protein                                        | VTDB_HUMAN  |
|  | 3.918 | 0.653  | 1.28233  | Adenosine kinase                                                 | P55263      |
|  | 3.494 | 0.6988 | 1.23897  | Dipeptidyl peptidase 4                                           | DPP4_HUMAN  |
|  | 4.105 | 0.5865 | 1.23012  | Gastrotropin                                                     | FABP6_HUMAN |
|  | 3.506 | 0.7013 | 1.2275   | cAMP-dependent protein kinase catalytic subunit alpha            | P00517      |
|  | 3.68  | 0.736  | 1.22571  | Tyrosine-protein phosphatase non-receptor type 11                | PTN11_HUMAN |
|  | 3.496 | 0.6992 | 1.16441  | Aldo-keto reductase family 1 member C1                           | Q04828      |
|  | 3.643 | 0.6071 | 1.15899  | Oxysterols receptor LXR-alpha                                    | NR1H3_HUMAN |
|  | 3.803 | 0.4754 | 1.15209  | Proto-oncogene tyrosine-protein kinase ABL1                      | P00519      |
|  | 3.682 | 0.6137 | 1.13523  | Oxysterols receptor LXR-beta                                     | NR1H2_HUMAN |
|  | 3.58  | 0.5967 | 1.11689  | Receptor tyrosine-protein kinase erbB-4                          | ERBB4_HUMAN |
|  | 3.823 | 0.4778 | 1.04702  | Caspase-3                                                        | CASP3_HUMAN |
|  | 3.302 | 0.8254 | 1.03785  | Bile salt sulfotransferase                                       | Q06520      |
|  | 3.577 | 0.511  | 1.02172  | 72 kDa type IV collagenase                                       | MMP2_HUMAN  |
|  | 3.751 | 0.6252 | 1.0187   | E3 ubiquitin-protein ligase Mdm2                                 | MDM2_HUMAN  |
|  | 3.637 | 0.6062 | 0.953957 | Proto-oncogene tyrosine-protein kinase LCK                       | LCK_HUMAN   |
|  | 3.39  | 0.2608 | 0.952463 | Amine oxidase [flavin-containing] A                              | AOFA_HUMAN  |
|  | 3.771 | 0.419  | 0.941721 | Serine/threonine-protein phosphatase PP1-gamma catalytic subunit | P36873      |
|  | 3.962 | 0.3048 | 0.934209 | Endothelial protein C receptor                                   | EPCR_HUMAN  |

|          |       |        |          |                                                       |             |
|----------|-------|--------|----------|-------------------------------------------------------|-------------|
|          | 4.124 | 0.3749 | 0.928225 | Phosphatidylcholine transfer protein                  | Q9UKL6      |
|          | 4.125 | 0.4583 | 0.921475 | Retinoic acid receptor beta                           | RARB_HUMAN  |
|          | 3.806 | 0.6344 | 0.91398  | Alcohol dehydrogenase class-3                         | ADHX_HUMAN  |
|          | 3.552 | 0.5074 | 0.886505 | Interleukin-2                                         | IL2_HUMAN   |
|          | 3.681 | 0.6134 | 0.876165 | Glutathione-requiring prostaglandin D synthase        | PTGD2_HUMAN |
|          | 3.453 | 0.5756 | 0.867518 | Tyrosine-protein phosphatase non-receptor type 1      | PTN1_HUMAN  |
|          | 3.612 | 0.516  | 0.856572 | Tyrosine-protein kinase ZAP-70                        | ZAP70_HUMAN |
|          | 3.609 | 0.6014 | 0.830198 | Tyrosine-protein kinase SYK                           | KSYK_HUMAN  |
|          | 3.367 | 0.5611 | 0.825552 | Alpha-1-antitrypsin                                   | A1AT_HUMAN  |
|          | 3.992 | 0.499  | 0.82216  | Histamine N-methyltransferase                         | P50135      |
|          | 3.757 | 0.4174 | 0.814298 | Mast/stem cell growth factor receptor                 | KIT_HUMAN   |
| NSC63551 | 5.436 | 0.7765 | 3.60171  | Gastrotropin                                          | FABP6_HUMAN |
|          | 5.131 | 0.6414 | 3.26482  | Ferrochelatase, mitochondrial                         | P22830      |
|          | 3.902 | 0.9755 | 2.7743   | Nuclear receptor ROR-alpha                            | RORA_HUMAN  |
|          | 4.332 | 0.8664 | 2.46918  | SEC14-like protein 2                                  | O76054      |
|          | 3.896 | 0.7793 | 2.29431  | Bile acid receptor                                    | NR1H4_HUMAN |
|          | 4.148 | 0.6913 | 2.07499  | Trafficking protein particle complex subunit 3        | O43617      |
|          | 3.897 | 0.7794 | 2.01976  | Calmodulin                                            | CALM_HUMAN  |
|          | 3.949 | 0.7897 | 1.96569  | Corticosteroid 11-beta-dehydrogenase isozyme 1        | DH11_HUMAN  |
|          | 3.806 | 0.6343 | 1.87628  | Glutathione S-transferase P                           | GSTP1_HUMAN |
|          | 3.669 | 0.7337 | 1.86833  | cAMP-dependent protein kinase catalytic subunit alpha | P00517      |
|          | 3.891 | 0.7782 | 1.80556  | Mineralocorticoid receptor                            | MCR_HUMAN   |



|  |       |        |         |                                                                |                 |
|--|-------|--------|---------|----------------------------------------------------------------|-----------------|
|  | 4.361 | 0.623  | 1.78467 | Sulfotransferase family cytosolic<br>2B member 1               | O00204          |
|  | 3.813 | 0.6354 | 1.7724  | Histone deacetylase 8                                          | HDAC8_H<br>UMAN |
|  | 4.034 | 0.8068 | 1.76751 | Estradiol 17-beta-dehydrogenase<br>1                           | P14061          |
|  | 3.923 | 0.6538 | 1.71    | Glutathione S-transferase A1                                   | P08263          |
|  | 3.736 | 0.4152 | 1.70037 | Phosphatidylinositol 3-kinase<br>regulatory subunit alpha      | P85A_HUM<br>AN  |
|  | 4.013 | 0.5733 | 1.69641 | Cytochrome P450 2C8                                            | CP2C8_HU<br>MAN |
|  | 4.458 | 0.4458 | 1.63648 | Vitamin D3 receptor                                            | VDR_HUM<br>AN   |
|  | 3.857 | 0.4821 | 1.60171 | Stromelysin-1                                                  | MMP3_HU<br>MAN  |
|  | 3.654 | 0.7307 | 1.56665 | Alpha-tocopherol transfer protein                              | P49638          |
|  | 4.688 | 0.5209 | 1.52721 | Dual specificity mitogen-<br>activated protein kinase kinase 1 | MP2K1_HU<br>MAN |
|  | 3.678 | 0.613  | 1.42012 | Nuclear receptor subfamily 1<br>group I member 3               | NR1I3_HU<br>MAN |
|  | 3.864 | 0.6439 | 1.39892 | Adenosine kinase                                               | P55263          |
|  | 3.675 | 0.6125 | 1.34285 | Retinol-binding protein 4                                      | RET4_HU<br>MAN  |
|  | 3.574 | 0.5957 | 1.32464 | Receptor tyrosine-protein kinase<br>erbB-4                     | ERBB4_HU<br>MAN |
|  | 3.669 | 0.5242 | 1.31682 | Interleukin-2                                                  | IL2_HUMA<br>N   |
|  | 4.042 | 0.311  | 1.26288 | Endothelial protein C receptor                                 | EPCR_HU<br>MAN  |
|  | 3.713 | 0.6189 | 1.25438 | Tyrosine-protein kinase SYK                                    | KSYK_HU<br>MAN  |
|  | 3.871 | 0.4839 | 1.25358 | Phospholipase A2, membrane<br>associated                       | P14555          |
|  | 3.587 | 0.7174 | 1.24446 | Tyrosine-protein phosphatase<br>non-receptor type 11           | PTN11_HU<br>MAN |
|  | 3.955 | 0.4944 | 1.23939 | Retinoic acid receptor gamma                                   | RARG_HU<br>MAN  |
|  | 3.624 | 0.6041 | 1.23049 | Oxysterols receptor LXR-beta                                   | NR1H2_HU<br>MAN |
|  | 3.573 | 0.5104 | 1.19972 | 72 kDa type IV collagenase                                     | MMP2_HU<br>MAN  |

|                     |       |        |          |                                                |             |
|---------------------|-------|--------|----------|------------------------------------------------|-------------|
|                     | 3.597 | 0.8991 | 1.1992   | Vitamin D-binding protein                      | VTDB_HUMAN  |
|                     | 3.59  | 0.5983 | 1.19139  | Ephrin type-B receptor 4                       | EPHB4_HUMAN |
|                     | 3.712 | 0.464  | 1.18011  | Proto-oncogene tyrosine-protein kinase ABL1    | P00519      |
|                     | 3.855 | 0.4283 | 1.15846  | Mast/stem cell growth factor receptor          | KIT_HUMAN   |
|                     | 4.411 | 0.4411 | 1.09084  | Retinoic acid receptor RXR-beta                | RXRB_HUMAN  |
|                     | 3.339 | 0.8347 | 1.08709  | Progesterone receptor                          | PRGR_HUMAN  |
|                     | 3.689 | 0.6148 | 1.07659  | Glutathione-requiring prostaglandin D synthase | PTGD2_HUMAN |
|                     | 3.877 | 0.5538 | 1.06993  | Mitogen-activated protein kinase 10            | MK10_HUMAN  |
|                     | 3.435 | 0.4294 | 1.04332  | Heat shock protein HSP 90-beta                 | P08238      |
|                     | 3.764 | 0.6273 | 1.0381   | Alcohol dehydrogenase class-3                  | ADHX_HUMAN  |
|                     | 3.428 | 0.5713 | 1.03701  | Flavin reductase                               | P30043      |
|                     | 3.934 | 0.562  | 0.961004 | Fatty acid-binding protein, brain              | FABP7_HUMAN |
|                     | 3.153 | 0.6306 | 0.956741 | Vascular endothelial growth factor receptor 2  | P35968      |
|                     | 4.016 | 0.4463 | 0.936628 | Retinoic acid receptor beta                    | RARB_HUMAN  |
|                     | 3.299 | 0.6599 | 0.929918 | Aldo-keto reductase family 1 member C1         | Q04828      |
|                     | 4.003 | 0.5003 | 0.913873 | Glucocorticoid receptor                        | GCR_HUMAN   |
|                     | 3.775 | 0.5394 | 0.873458 | Fatty acid-binding protein, heart              | FABPH_HUMAN |
|                     | 3.216 | 0.6431 | 0.859073 | Steroid hormone receptor ERR1                  | P11474      |
|                     | 3.566 | 0.5944 | 0.848125 | E3 ubiquitin-protein ligase Mdm2               | MDM2_HUMAN  |
|                     | 3.661 | 0.523  | 0.805448 | Hepatocyte nuclear factor 4-gamma              | Q14541      |
| <b>Obtusifoliol</b> | 3.972 | 0.9929 | 2.62787  | Nuclear receptor ROR-alpha                     | RORA_HUMAN  |
|                     | 4.594 | 0.9188 | 2.5183   | Estradiol 17-beta-dehydrogenase 1              | P14061      |

|  |       |        |         |                                                            |             |
|--|-------|--------|---------|------------------------------------------------------------|-------------|
|  | 4.412 | 0.8823 | 2.31528 | SEC14-like protein 2                                       | O76054      |
|  | 4.184 | 0.5977 | 2.14142 | Renin                                                      | RENI_HUMAN  |
|  | 3.893 | 0.7786 | 1.99556 | Bile acid receptor                                         | NR1H4_HUMAN |
|  | 4.277 | 0.611  | 1.94212 | Lanosterol synthase                                        | ERG7_HUMAN  |
|  | 4.294 | 0.7157 | 1.91753 | Glutathione-requiring prostaglandin D synthase             | PTGD2_HUMAN |
|  | 3.739 | 0.9348 | 1.89042 | Progesterone receptor                                      | PRGR_HUMAN  |
|  | 3.71  | 0.9276 | 1.88444 | Mineralocorticoid receptor                                 | MCR_HUMAN   |
|  | 3.695 | 0.6159 | 1.77162 | Ganglioside GM2 activator                                  | P17900      |
|  | 3.913 | 0.6521 | 1.72348 | NAD(P)H dehydrogenase [quinone] 1                          | NQO1_HUMAN  |
|  | 3.596 | 0.7191 | 1.67914 | Alcohol dehydrogenase 1C                                   | P00326      |
|  | 4.345 | 0.5432 | 1.63216 | Retinoic acid receptor gamma                               | RARG_HUMAN  |
|  | 4.109 | 0.5871 | 1.62172 | Cytochrome P450 2C8                                        | CP2C8_HUMAN |
|  | 3.673 | 0.7347 | 1.61881 | Dipeptidyl peptidase 4                                     | DPP4_HUMAN  |
|  | 3.908 | 0.7817 | 1.5999  | Corticosteroid 11-beta-dehydrogenase isozyme 1             | DH11_HUMAN  |
|  | 4.655 | 0.5819 | 1.55038 | Fatty acid-binding protein, heart                          | FABPH_HUMAN |
|  | 4.006 | 0.6677 | 1.54501 | Trafficking protein particle complex subunit 3             | O43617      |
|  | 3.867 | 0.5525 | 1.5402  | 72 kDa type IV collagenase                                 | MMP2_HUMAN  |
|  | 3.723 | 0.7445 | 1.52077 | Androgen receptor                                          | ANDR_HUMAN  |
|  | 4.341 | 0.6202 | 1.51462 | Sulfotransferase family cytosolic 2B member 1              | O00204      |
|  | 3.72  | 0.62   | 1.50842 | Flavin reductase                                           | P30043      |
|  | 4.855 | 0.5394 | 1.49867 | Dual specificity mitogen-activated protein kinase kinase 1 | MP2K1_HUMAN |
|  | 3.773 | 0.7547 | 1.45696 | Calmodulin                                                 | CALM_HUMAN  |
|  | 3.542 | 0.8855 | 1.43208 | Collagenase 3                                              | MMP13_HUMAN |

|       |        |         |                                                   |             |
|-------|--------|---------|---------------------------------------------------|-------------|
|       |        |         |                                                   | UMAN        |
| 5.081 | 0.6351 | 1.43099 | Retinol-binding protein 4                         | RET4_HUMAN  |
| 3.893 | 0.6488 | 1.39653 | Glutathione S-transferase A1                      | P08263      |
| 4.265 | 0.3281 | 1.39396 | Endothelial protein C receptor                    | EPCR_HUMAN  |
| 4.201 | 0.6002 | 1.38946 | Mitogen-activated protein kinase 10               | MK10_HUMAN  |
| 4.247 | 0.7078 | 1.34136 | Sex hormone-binding globulin                      | SHBG_HUMAN  |
| 3.645 | 0.6075 | 1.33217 | Oxysterols receptor LXR-beta                      | NR1H2_HUMAN |
| 4.092 | 0.5115 | 1.32201 | Ferrochelatase, mitochondrial                     | P22830      |
| 3.516 | 0.7031 | 1.30997 | Histone deacetylase 8                             | Q9BY41      |
| 4.416 | 0.4907 | 1.28631 | Retinoic acid receptor beta                       | RARB_HUMAN  |
| 3.886 | 0.4858 | 1.28396 | Proto-oncogene tyrosine-protein kinase ABL1       | P00519      |
| 3.702 | 0.6171 | 1.28347 | Oxysterols receptor LXR-alpha                     | NR1H3_HUMAN |
| 3.604 | 0.6007 | 1.28125 | Poly [ADP-ribose] polymerase 1                    | P09874      |
| 3.747 | 0.5353 | 1.25532 | Interleukin-2                                     | IL2_HUMAN   |
| 3.612 | 0.7225 | 1.25156 | Alpha-tocopherol transfer protein                 | P49638      |
| 3.628 | 0.4535 | 1.2191  | Vitamin D3 receptor                               | VDR_HUMAN   |
| 3.452 | 0.6903 | 1.21899 | Glutathione S-transferase P                       | GSTP1_HUMAN |
| 4.021 | 0.5745 | 1.18766 | Estrogen sulfotransferase                         | ST1E1_HUMAN |
| 3.64  | 0.7281 | 1.18033 | Prothrombin                                       | THRB_HUMAN  |
| 3.353 | 0.8382 | 1.17235 | Bile salt sulfotransferase                        | Q06520      |
| 3.594 | 0.5991 | 1.16369 | Peroxisome proliferator-activated receptor alpha  | PPARA_HUMAN |
| 3.636 | 0.7271 | 1.1214  | Tyrosine-protein phosphatase non-receptor type 11 | PTN11_HUMAN |
| 4.164 | 0.5948 | 1.11138 | Fatty acid-binding protein, brain                 | FABP7_HUMAN |
| 3.391 | 0.8478 | 1.09738 | Mitogen-activated protein kinase 14               | Q16539      |

|                                 |       |        |          |                                                                  |              |
|---------------------------------|-------|--------|----------|------------------------------------------------------------------|--------------|
|                                 | 4.184 | 0.523  | 1.08325  | Histamine N-methyltransferase                                    | P50135       |
|                                 | 3.432 | 0.6864 | 1.0629   | cAMP-dependent protein kinase catalytic subunit alpha            | P00517       |
|                                 | 3.829 | 0.4254 | 1.05615  | Cathepsin B                                                      | CATB_HUMAN   |
|                                 | 4.007 | 0.5724 | 1.05564  | Gastrotropin                                                     | FABP6_HUMAN  |
|                                 | 3.809 | 0.6348 | 1.05438  | Adenosine kinase                                                 | P55263       |
|                                 | 3.44  | 0.688  | 1.05412  | Aldo-keto reductase family 1 member C1                           | Q04828       |
|                                 | 3.805 | 0.4228 | 0.995466 | Serine/threonine-protein phosphatase PP1-gamma catalytic subunit | P36873       |
|                                 | 4.186 | 0.3806 | 0.991787 | Phosphatidylcholine transfer protein                             | Q9UKL6       |
|                                 | 3.52  | 0.5029 | 0.9355   | Serine/threonine-protein kinase 6                                | O14965       |
|                                 | 3.556 | 0.508  | 0.919515 | Neutrophil gelatinase-associated lipocalin                       | NGAL_HUMAN   |
|                                 | 3.703 | 0.6172 | 0.91503  | E3 ubiquitin-protein ligase Mdm2                                 | MDM2_HUMAN   |
|                                 | 3.607 | 0.6011 | 0.899894 | Tyrosine-protein kinase ITK/TSK                                  | Q08881       |
|                                 | 3.543 | 0.5904 | 0.889269 | Tyrosine-protein kinase JAK3                                     | JAK3_HUMAN   |
|                                 | 3.524 | 0.5034 | 0.883855 | Macrophage metalloelastase                                       | MMP12_HUMAN  |
|                                 | 3.544 | 0.8861 | 0.828745 | Vitamin D-binding protein                                        | VTDB_HUMAN   |
|                                 | 4.348 | 0.4348 | 0.823816 | Retinoic acid receptor RXR-beta                                  | RXRBB_HUMAN  |
|                                 | 3.834 | 0.4792 | 0.805951 | Peptidyl-prolyl cis-trans isomerase FKBP1A                       | FKBP1A_HUMAN |
|                                 | 3.454 | 0.3838 | 0.803381 | Phosphatidylinositol 3-kinase regulatory subunit alpha           | P85A_HUMAN   |
| <b>poriferast-5-en-3beta-ol</b> | 4.634 | 0.9268 | 2.66419  | Estradiol 17-beta-dehydrogenase 1                                | P14061       |
|                                 | 3.928 | 0.982  | 2.55949  | Nuclear receptor ROR-alpha                                       | RORA_HUMAN   |
|                                 | 4.486 | 0.8971 | 2.52015  | SEC14-like protein 2                                             | O76054       |
|                                 | 4.331 | 0.7219 | 2.19431  | Trafficking protein particle complex subunit 3                   | O43617       |

|  |       |        |         |                                                        |             |
|--|-------|--------|---------|--------------------------------------------------------|-------------|
|  | 3.821 | 0.9553 | 2.13142 | Progesterone receptor                                  | PRGR_HUMAN  |
|  | 3.738 | 0.9344 | 1.95901 | Mineralocorticoid receptor                             | MCR_HUMAN   |
|  | 3.856 | 0.7711 | 1.94294 | Bile acid receptor                                     | NR1H4_HUMAN |
|  | 4.251 | 0.5314 | 1.88147 | Caspase-3                                              | CASP3_HUMAN |
|  | 3.767 | 0.7534 | 1.86062 | Cell division protein kinase 2                         | P24941      |
|  | 4.344 | 0.6206 | 1.838   | Hepatocyte nuclear factor 4-gamma                      | Q14541      |
|  | 4.495 | 0.6421 | 1.7927  | Sulfotransferase family cytosolic 2B member 1          | O00204      |
|  | 3.964 | 0.7928 | 1.75502 | Corticosteroid 11-beta-dehydrogenase isozyme 1         | DH11_HUMAN  |
|  | 4.29  | 0.5363 | 1.73331 | Retinoic acid receptor alpha                           | RARA_HUMAN  |
|  | 4.447 | 0.7411 | 1.66958 | Sex hormone-binding globulin                           | SHBG_HUMAN  |
|  | 3.851 | 0.6419 | 1.63641 | Oxysterols receptor LXR-alpha                          | NR1H3_HUMAN |
|  | 3.709 | 0.7418 | 1.63463 | Aldo-keto reductase family 1 member C1                 | Q04828      |
|  | 3.806 | 0.7612 | 1.61372 | Prothrombin                                            | THRB_HUMAN  |
|  | 5.19  | 0.6487 | 1.60679 | Retinol-binding protein 4                              | RET4_HUMAN  |
|  | 3.634 | 0.7269 | 1.592   | Steroid hormone receptor ERR1                          | P11474      |
|  | 4.239 | 0.5299 | 1.51214 | Retinoic acid receptor gamma                           | RARG_HUMAN  |
|  | 4.022 | 0.5746 | 1.50164 | Cytochrome P450 2C8                                    | CP2C8_HUMAN |
|  | 4.176 | 0.522  | 1.48988 | Ferrochelatase, mitochondrial                          | P22830      |
|  | 3.813 | 0.9532 | 1.48792 | Vitamin D-binding protein                              | VTDB_HUMAN  |
|  | 3.747 | 0.4163 | 1.48603 | Phosphatidylinositol 3-kinase regulatory subunit alpha | P85A_HUMAN  |
|  | 3.964 | 0.6606 | 1.45773 | E3 ubiquitin-protein ligase Mdm2                       | MDM2_HUMAN  |
|  | 4.408 | 0.551  | 1.44548 | Fatty acid-binding protein, brain                      | FABP7_HUMAN |

|  |       |        |         |                                                                  |             |
|--|-------|--------|---------|------------------------------------------------------------------|-------------|
|  | 3.888 | 0.648  | 1.41596 | Glutathione S-transferase A1                                     | P08263      |
|  | 4.024 | 0.4472 | 1.39511 | Growth factor receptor-bound protein 2                           | GRB2_HUMAN  |
|  | 3.676 | 0.4594 | 1.36618 | Heat shock protein HSP 90-beta                                   | P08238      |
|  | 4.262 | 0.4735 | 1.35583 | Angiotensin-1 receptor                                           | TIE2_HUMAN  |
|  | 3.64  | 0.6066 | 1.33438 | Flavin reductase                                                 | P30043      |
|  | 3.852 | 0.642  | 1.32934 | Tyrosine-protein kinase SYK                                      | KSYK_HUMAN  |
|  | 4.365 | 0.4365 | 1.3199  | Vitamin D3 receptor                                              | VDR_HUMAN   |
|  | 3.488 | 0.6977 | 1.31166 | Glutathione S-transferase P                                      | GSTP1_HUMAN |
|  | 3.695 | 0.739  | 1.30117 | Calmodulin                                                       | CALM_HUMAN  |
|  | 4.682 | 0.4682 | 1.25793 | Retinoic acid receptor RXR-beta                                  | RXRβ_HUMAN  |
|  | 3.49  | 0.6981 | 1.24682 | Histone deacetylase 8                                            | Q9BY41      |
|  | 3.695 | 0.6159 | 1.20798 | Ephrin type-B receptor 4                                         | EPHB4_HUMAN |
|  | 3.872 | 0.6454 | 1.20163 | Adenosine kinase                                                 | P55263      |
|  | 3.665 | 0.733  | 1.20146 | Tyrosine-protein phosphatase non-receptor type 11                | PTN11_HUMAN |
|  | 3.411 | 0.5685 | 1.19271 | cGMP-specific 3,5-cyclic phosphodiesterase                       | PDE5A_HUMAN |
|  | 4.559 | 0.5066 | 1.1925  | Dual specificity mitogen-activated protein kinase kinase 1       | MP2K1_HUMAN |
|  | 3.571 | 0.5951 | 1.17807 | Tyrosine-protein phosphatase non-receptor type 1                 | PTN1_HUMAN  |
|  | 3.61  | 0.6017 | 1.16035 | NAD(P)H dehydrogenase [quinone] 1                                | NQO1_HUMAN  |
|  | 3.867 | 0.4297 | 1.14125 | Serine/threonine-protein phosphatase PP1-gamma catalytic subunit | P36873      |
|  | 3.444 | 0.6888 | 1.13978 | Dipeptidyl peptidase 4                                           | DPP4_HUMAN  |
|  | 3.824 | 0.6373 | 1.13692 | Glutathione-requiring prostaglandin D synthase                   | PTGD2_HUMAN |
|  | 4.024 | 0.5749 | 1.11152 | Gastrotropin                                                     | FABP6_HUMAN |
|  | 3.62  | 0.5172 | 1.10902 | 72 kDa type IV collagenase                                       | MMP2_HUMAN  |

|                   |       |        |          |                                                                            |             |
|-------------------|-------|--------|----------|----------------------------------------------------------------------------|-------------|
|                   |       |        |          |                                                                            | MAN         |
|                   | 3.771 | 0.4713 | 1.10317  | Proto-oncogene tyrosine-protein kinase ABL1                                | P00519      |
|                   | 3.757 | 0.6262 | 1.08505  | [Pyruvate dehydrogenase [lipoamide]] kinase isozyme 2, mitochondrial       | PDK2_HUMAN  |
|                   | 3.686 | 0.6143 | 1.0832   | Tyrosine-protein kinase ITK/TSK                                            | Q08881      |
|                   | 3.639 | 0.6065 | 1.05309  | Oxysterols receptor LXR-beta                                               | NR1H2_HUMAN |
|                   | 3.679 | 0.6132 | 1.04731  | Proto-oncogene tyrosine-protein kinase LCK                                 | LCK_HUMAN   |
|                   | 3.55  | 0.5072 | 1.04655  | Protein S100-A9                                                            | S10A9_HUMAN |
|                   | 3.302 | 0.8254 | 1.04604  | Bile salt sulfotransferase                                                 | Q06520      |
|                   | 3.538 | 0.5897 | 1.04238  | Peroxisome proliferator-activated receptor alpha                           | PPARA_HUMAN |
|                   | 3.851 | 0.6418 | 1.00654  | Alcohol dehydrogenase class-3                                              | ADHX_HUMAN  |
|                   | 5.686 | 0.5686 | 0.99712  | Cellular retinoic acid-binding protein 2                                   | P29373      |
|                   | 3.971 | 0.3054 | 0.957404 | Endothelial protein C receptor                                             | EPCR_HUMAN  |
|                   | 4.042 | 0.5052 | 0.945873 | Basic fibroblast growth factor receptor 1                                  | FGFR1_HUMAN |
|                   | 4.049 | 0.5061 | 0.91633  | Histamine N-methyltransferase                                              | P50135      |
|                   | 3.627 | 0.5182 | 0.894068 | Tyrosine-protein kinase ZAP-70                                             | ZAP70_HUMAN |
|                   | 3.384 | 0.5639 | 0.868562 | Alpha-1-antitrypsin                                                        | A1AT_HUMAN  |
|                   | 3.578 | 0.5111 | 0.865114 | Protein farnesyltransferase/geranylgeranyltransferase type-1 subunit alpha | FNTA_HUMAN  |
|                   | 3.53  | 0.5043 | 0.851831 | Interleukin-2                                                              | IL2_HUMAN   |
|                   | 3.587 | 0.5125 | 0.813116 | Insulin-like growth factor IA                                              | P01343      |
| <b>sitosterol</b> | 5.121 | 0.6401 | 3.20438  | Ferrochelatase, mitochondrial                                              | P22830      |
|                   | 4.427 | 0.6325 | 2.72337  | Insulin-like growth factor IA                                              | P01343      |
|                   | 4.381 | 0.8763 | 2.52749  | SEC14-like protein 2                                                       | O76054      |
|                   | 4.211 | 0.5264 | 2.22582  | Interleukin-2                                                              | IL2_HUMAN   |



|  |       |        |         |                                                        |             |
|--|-------|--------|---------|--------------------------------------------------------|-------------|
|  | 3.687 | 0.9218 | 2.16304 | Nuclear receptor ROR-alpha                             | RORA_HUMAN  |
|  | 3.919 | 0.7838 | 2.13568 | Prothrombin                                            | THRB_HUMAN  |
|  | 4.17  | 0.695  | 2.08289 | Trafficking protein particle complex subunit 3         | O43617      |
|  | 4.249 | 0.7081 | 2.07326 | Glutathione-requiring prostaglandin D synthase         | PTGD2_HUMAN |
|  | 3.813 | 0.7626 | 2.05484 | Bile acid receptor                                     | NR1H4_HUMAN |
|  | 3.861 | 0.6434 | 2.0494  | Alpha-1-antitrypsin                                    | A1AT_HUMAN  |
|  | 4.49  | 0.6415 | 2.02    | Gastrotropin                                           | FABP6_HUMAN |
|  | 3.673 | 0.9183 | 1.96802 | Progesterone receptor                                  | PRGR_HUMAN  |
|  | 4.48  | 0.6399 | 1.93919 | Sulfotransferase family cytosolic 2B member 1          | O00204      |
|  | 4.124 | 0.8248 | 1.907   | Estradiol 17-beta-dehydrogenase 1                      | P14061      |
|  | 3.843 | 0.6405 | 1.90688 | Receptor tyrosine-protein kinase erbB-4                | ERBB4_HUMAN |
|  | 3.909 | 0.7818 | 1.83933 | Corticosteroid 11-beta-dehydrogenase isozyme 1         | DH11_HUMAN  |
|  | 3.888 | 0.7775 | 1.76958 | Mineralocorticoid receptor                             | MCR_HUMAN   |
|  | 4.048 | 0.5783 | 1.75316 | Lanosterol synthase                                    | ERG7_HUMAN  |
|  | 4.24  | 0.53   | 1.679   | Retinoic acid receptor gamma                           | RARG_HUMAN  |
|  | 5.116 | 0.6396 | 1.66911 | Retinol-binding protein 4                              | RET4_HUMAN  |
|  | 3.704 | 0.4116 | 1.58897 | Phosphatidylinositol 3-kinase regulatory subunit alpha | P85A_HUMAN  |
|  | 3.729 | 0.7459 | 1.58238 | Calmodulin                                             | CALM_HUMAN  |
|  | 3.561 | 0.7121 | 1.5703  | Dipeptidyl peptidase 4                                 | DPP4_HUMAN  |
|  | 4.09  | 0.5112 | 1.55896 | Retinoic acid receptor alpha                           | RARA_HUMAN  |
|  | 3.763 | 0.5375 | 1.52807 | Basic fibroblast growth factor receptor 1              | FGFR1_HUMAN |

|  |       |        |         |                                                            |             |
|--|-------|--------|---------|------------------------------------------------------------|-------------|
|  | 3.929 | 0.5612 | 1.50408 | Cytochrome P450 2C8                                        | CP2C8_HUMAN |
|  | 4.66  | 0.5178 | 1.46249 | Dual specificity mitogen-activated protein kinase kinase 1 | MP2K1_HUMAN |
|  | 4.029 | 0.5755 | 1.45301 | Hepatocyte nuclear factor 4-gamma                          | Q14541      |
|  | 3.633 | 0.519  | 1.43679 | Protein S100-A9                                            | S10A9_HUMAN |
|  | 3.676 | 0.7352 | 1.42554 | Tyrosine-protein phosphatase non-receptor type 11          | PTN11_HUMAN |
|  | 3.655 | 0.5222 | 1.33179 | 72 kDa type IV collagenase                                 | MMP2_HUMAN  |
|  | 3.63  | 0.605  | 1.33008 | Oxysterols receptor LXR-alpha                              | NR1H3_HUMAN |
|  | 3.664 | 0.458  | 1.25324 | Vitamin D3 receptor                                        | VDR_HUMAN   |
|  | 3.694 | 0.6157 | 1.25218 | Proto-oncogene tyrosine-protein kinase LCK                 | LCK_HUMAN   |
|  | 3.515 | 0.5858 | 1.22715 | Flavin reductase                                           | P30043      |
|  | 3.709 | 0.5298 | 1.22255 | Tyrosine-protein kinase ZAP-70                             | ZAP70_HUMAN |
|  | 3.842 | 0.4269 | 1.2177  | Growth factor receptor-bound protein 2                     | GRB2_HUMAN  |
|  | 3.715 | 0.5307 | 1.21268 | S-methyl-5-thioadenosine phosphorylase                     | Q13126      |
|  | 4.016 | 0.3089 | 1.1902  | Endothelial protein C receptor                             | EPCR_HUMAN  |
|  | 3.957 | 0.5654 | 1.18183 | Mitogen-activated protein kinase 10                        | MK10_HUMAN  |
|  | 4.5   | 0.45   | 1.17529 | Retinoic acid receptor RXR-beta                            | RXRB_HUMAN  |
|  | 3.599 | 0.8998 | 1.17168 | Vitamin D-binding protein                                  | VTDB_HUMAN  |
|  | 3.416 | 0.6833 | 1.16852 | Aldo-keto reductase family 1 member C1                     | Q04828      |
|  | 3.425 | 0.685  | 1.1605  | Serine/threonine-protein kinase Chk1                       | CHK1_HUMAN  |
|  | 3.632 | 0.6053 | 1.15061 | Tyrosine-protein kinase ITK/TSK                            | Q08881      |
|  | 3.656 | 0.6093 | 1.12014 | Glutathione S-transferase A1                               | P08263      |
|  | 3.555 | 0.5925 | 1.0495  | Oxysterols receptor LXR-beta                               | NR1H2_HUMAN |

|                          |       |        |          |                                                |             |
|--------------------------|-------|--------|----------|------------------------------------------------|-------------|
|                          |       |        |          |                                                | MAN         |
|                          | 3.319 | 0.6638 | 0.997923 | Histone deacetylase 8                          | Q9BY41      |
|                          | 3.673 | 0.6121 | 0.97914  | Adenosine kinase                               | P55263      |
|                          | 3.53  | 0.5043 | 0.959589 | Peptidyl-prolyl cis-trans isomerase FKBP1A     | FKB1A_HUMAN |
|                          | 3.406 | 0.4258 | 0.95368  | Heat shock protein HSP 90-beta                 | P08238      |
|                          | 5.462 | 0.5462 | 0.941554 | Cellular retinoic acid-binding protein 2       | P29373      |
|                          | 3.739 | 0.4154 | 0.936788 | Mast/stem cell growth factor receptor          | KIT_HUMAN   |
|                          | 3.266 | 0.6533 | 0.921289 | Glutathione S-transferase P                    | GSTP1_HUMAN |
|                          | 3.907 | 0.5581 | 0.890712 | Fatty acid-binding protein, brain              | FABP7_HUMAN |
|                          | 3.362 | 0.6725 | 0.88766  | Alpha-tocopherol transfer protein              | P49638      |
|                          | 3.968 | 0.4409 | 0.844198 | Retinoic acid receptor beta                    | RARB_HUMAN  |
|                          | 3.215 | 0.643  | 0.835375 | Steroid hormone receptor ERR1                  | P11474      |
| <b>Sitosterol alpha1</b> | 5.255 | 0.6568 | 3.8521   | Caspase-3                                      | CASP3_HUMAN |
|                          | 4.461 | 0.8923 | 2.51297  | SEC14-like protein 2                           | O76054      |
|                          | 3.88  | 0.97   | 2.4967   | Nuclear receptor ROR-alpha                     | RORA_HUMAN  |
|                          | 4.482 | 0.8964 | 2.42226  | Estradiol 17-beta-dehydrogenase 1              | P14061      |
|                          | 3.959 | 0.7917 | 2.23976  | Bile acid receptor                             | NR1H4_HUMAN |
|                          | 3.996 | 0.666  | 2.01424  | Oxysterols receptor LXR-alpha                  | NR1H3_HUMAN |
|                          | 4.238 | 0.6054 | 1.96241  | Lanosterol synthase                            | ERG7_HUMAN  |
|                          | 4.172 | 0.6953 | 1.93613  | Trafficking protein particle complex subunit 3 | O43617      |
|                          | 3.91  | 0.782  | 1.93504  | Prothrombin                                    | THRB_HUMAN  |
|                          | 3.639 | 0.7279 | 1.87016  | Alcohol dehydrogenase 1C                       | P00326      |
|                          | 3.688 | 0.922  | 1.84446  | Progesterone receptor                          | PRGR_HUMAN  |
|                          | 4.293 | 0.477  | 1.81927  | Retinoic acid receptor gamma                   | RARG_HUMAN  |
|                          | 3.609 | 0.9023 | 1.7445   | Mineralocorticoid receptor                     | MCR_HUMAN   |

|       |        |         |                                                                  |             |
|-------|--------|---------|------------------------------------------------------------------|-------------|
|       |        |         |                                                                  | AN          |
| 3.631 | 0.6052 | 1.69563 | Ganglioside GM2 activator                                        | P17900      |
| 4.405 | 0.6293 | 1.68923 | Sulfotransferase family cytosolic<br>2B member 1                 | O00204      |
| 3.78  | 0.63   | 1.68624 | Oxysterols receptor LXR-beta                                     | NR1H2_HUMAN |
| 3.627 | 0.9067 | 1.68152 | Collagenase 3                                                    | MMP13_HUMAN |
| 3.895 | 0.779  | 1.65578 | Corticosteroid 11-beta-dehydrogenase isozyme 1                   | DH11_HUMAN  |
| 4.376 | 0.7294 | 1.59812 | Sex hormone-binding globulin                                     | SHBG_HUMAN  |
| 5.133 | 0.6416 | 1.56585 | Retinol-binding protein 4                                        | RET4_HUMAN  |
| 4.013 | 0.5733 | 1.52759 | Cytochrome P450 2C8                                              | CP2C8_HUMAN |
| 3.9   | 0.6501 | 1.48761 | Glutathione S-transferase A1                                     | P08263      |
| 4.129 | 0.5161 | 1.45101 | Ferrochelatase, mitochondrial                                    | P22830      |
| 3.767 | 0.6279 | 1.40147 | Ephrin type-B receptor 4                                         | EPHB4_HUMAN |
| 4.692 | 0.5213 | 1.38177 | Dual specificity mitogen-activated protein kinase kinase 1       | MP2K1_HUMAN |
| 3.67  | 0.7341 | 1.2997  | Calmodulin                                                       | CALM_HUMAN  |
| 3.632 | 0.4035 | 1.2748  | Phosphatidylinositol 3-kinase regulatory subunit alpha           | P85A_HUMAN  |
| 4.312 | 0.392  | 1.27077 | Serine/threonine-protein phosphatase PP1-gamma catalytic subunit | P36873      |
| 4.092 | 0.5845 | 1.25402 | Gastrotropin                                                     | FABP6_HUMAN |
| 3.594 | 0.5991 | 1.21135 | Receptor tyrosine-protein kinase erbB-4                          | ERBB4_HUMAN |
| 3.645 | 0.5208 | 1.20044 | 72 kDa type IV collagenase                                       | MMP2_HUMAN  |
| 3.639 | 0.7278 | 1.19798 | Tyrosine-protein phosphatase non-receptor type 11                | PTN11_HUMAN |
| 3.845 | 0.6409 | 1.19509 | Adenosine kinase                                                 | P55263      |
| 3.968 | 0.5668 | 1.17009 | Estrogen sulfotransferase                                        | ST1E1_HUMAN |
| 3.475 | 0.695  | 1.1607  | Vascular endothelial growth                                      | P35968      |

|       |        |          |                                                  |             |
|-------|--------|----------|--------------------------------------------------|-------------|
|       |        |          | factor receptor 2                                |             |
| 3.66  | 0.5229 | 1.15217  | Interleukin-2                                    | IL2_HUMAN   |
| 3.483 | 0.4353 | 1.13477  | Vitamin D3 receptor                              | VDR_HUMAN   |
| 4.056 | 0.312  | 1.13408  | Endothelial protein C receptor                   | EPCR_HUMAN  |
| 3.583 | 0.5118 | 1.11358  | Tyrosine-protein phosphatase non-receptor type 1 | PTN1_HUMAN  |
| 3.776 | 0.6293 | 1.0944   | Glutathione-requiring prostaglandin D synthase   | PTGD2_HUMAN |
| 3.872 | 0.6453 | 1.08942  | Alcohol dehydrogenase class-3                    | ADHX_HUMAN  |
| 4.19  | 0.3809 | 1.06769  | Phosphatidylcholine transfer protein             | Q9UKL6      |
| 3.678 | 0.5254 | 1.04027  | Tyrosine-protein kinase ZAP-70                   | ZAP70_HUMAN |
| 3.486 | 0.581  | 1.01999  | Flavin reductase                                 | P30043      |
| 3.669 | 0.4586 | 0.963685 | Proto-oncogene tyrosine-protein kinase ABL1      | P00519      |
| 3.373 | 0.6746 | 0.961981 | Aldo-keto reductase family 1 member C1           | Q04828      |
| 4.399 | 0.4399 | 0.94639  | Retinoic acid receptor RXR-beta                  | RXR_B_HUMAN |
| 3.893 | 0.4866 | 0.946157 | Phospholipase A2, membrane associated            | P14555      |
| 4.112 | 0.4569 | 0.942471 | Retinoic acid receptor beta                      | RARB_HUMAN  |
| 5.542 | 0.5542 | 0.909472 | Cellular retinoic acid-binding protein 2         | P29373      |
| 3.507 | 0.5845 | 0.870473 | Tyrosine-protein kinase JAK3                     | JAK3_HUMAN  |
| 3.646 | 0.5209 | 0.863476 | Protein kinase C theta type                      | KPCT_HUMAN  |
| 3.291 | 0.6583 | 0.863127 | Glutathione S-transferase P                      | GSTP1_HUMAN |
| 3.409 | 0.4261 | 0.848344 | Heat shock protein HSP 90-beta                   | P08238      |
| 3.835 | 0.5478 | 0.835931 | Fatty acid-binding protein, heart                | FABPH_HUMAN |
| 3.547 | 0.5911 | 0.831621 | Proto-oncogene tyrosine-protein kinase LCK       | LCK_HUMAN   |

|                     |        |         |                                                  |                                                                        |             |
|---------------------|--------|---------|--------------------------------------------------|------------------------------------------------------------------------|-------------|
| <b>Stigmasterol</b> | 4.632  | 0.9263  | 2.84641                                          | Estradiol 17-beta-dehydrogenase<br>1                                   | P14061      |
|                     | 3.938  | 0.9844  | 2.77644                                          | Nuclear receptor ROR-alpha                                             | RORA_HUMAN  |
|                     | 4.324  | 0.8647  | 2.37981                                          | SEC14-like protein 2                                                   | O76054      |
|                     | 3.821  | 0.9552  | 2.31655                                          | Progesterone receptor                                                  | PRGR_HUMAN  |
|                     | 3.805  | 0.7611  | 2.24111                                          | Histone deacetylase 8                                                  | Q9BY41      |
|                     | 3.783  | 0.9457  | 2.19264                                          | Mineralocorticoid receptor                                             | MCR_HUMAN   |
|                     | 3.888  | 0.7775  | 2.189                                            | Bile acid receptor                                                     | NR1H4_HUMAN |
|                     | 3.903  | 0.7806  | 1.94992                                          | Calmodulin                                                             | CALM_HUMAN  |
|                     | 4.499  | 0.6428  | 1.94304                                          | Sulfotransferase family cytosolic<br>2B member 1                       | O00204      |
|                     | 4.108  | 0.6846  | 1.92572                                          | Trafficking protein particle<br>complex subunit 3                      | O43617      |
|                     | 4.707  | 0.3621  | 1.89176                                          | Serine/threonine-protein<br>phosphatase PP1-gamma<br>catalytic subunit | P36873      |
|                     | 5.26   | 0.6575  | 1.81388                                          | Retinol-binding protein 4                                              | RET4_HUMAN  |
|                     | 4.449  | 0.7414  | 1.808                                            | Sex hormone-binding globulin                                           | SHBG_HUMAN  |
|                     | 4.092  | 0.6821  | 1.75273                                          | Glutathione-requiring<br>prostaglandin D synthase                      | PTGD2_HUMAN |
|                     | 4.561  | 0.4561  | 1.73209                                          | Vitamin D3 receptor                                                    | VDR_HUMAN   |
|                     | 3.781  | 0.4201  | 1.72564                                          | Phosphatidylinositol 3-kinase<br>regulatory subunit alpha              | P85A_HUMAN  |
|                     | 3.856  | 0.7713  | 1.67532                                          | Corticosteroid 11-beta-<br>dehydrogenase isozyme 1                     | DHI1_HUMAN  |
|                     | 4.239  | 0.5299  | 1.64811                                          | Retinoic acid receptor gamma                                           | RARG_HUMAN  |
|                     | 4.181  | 0.5226  | 1.6309                                           | Ferrochelatase, mitochondrial                                          | P22830      |
|                     | 3.908  | 0.6513  | 1.60464                                          | Glutathione S-transferase A1                                           | P08263      |
| 4.021               | 0.5027 | 1.58771 | Caspase-3                                        | CASP3_HUMAN                                                            |             |
| 3.776               | 0.6293 | 1.56502 | Nuclear receptor subfamily 1<br>group I member 3 | NR1I3_HUMAN                                                            |             |

|  |       |        |          |                                                            |             |
|--|-------|--------|----------|------------------------------------------------------------|-------------|
|  | 3.745 | 0.6241 | 1.54939  | Oxysterols receptor LXR-alpha                              | NR1H3_HUMAN |
|  | 3.926 | 0.6543 | 1.45402  | Adenosine kinase                                           | P55263      |
|  | 3.662 | 0.6103 | 1.44808  | Receptor tyrosine-protein kinase erbB-4                    | ERBB4_HUMAN |
|  | 4.664 | 0.5182 | 1.44763  | Dual specificity mitogen-activated protein kinase kinase 1 | MP2K1_HUMAN |
|  | 3.911 | 0.5587 | 1.43229  | Cytochrome P450 2C8                                        | CP2C8_HUMAN |
|  | 3.459 | 0.8647 | 1.37873  | Collagenase 3                                              | MMP13_HUMAN |
|  | 4.111 | 0.5874 | 1.37544  | Gastrotropin                                               | FABP6_HUMAN |
|  | 3.967 | 0.4959 | 1.30422  | Retinoic acid receptor alpha                               | RARA_HUMAN  |
|  | 3.654 | 0.6089 | 1.2541   | Ephrin type-B receptor 4                                   | EPHB4_HUMAN |
|  | 3.439 | 0.6878 | 1.24944  | Dipeptidyl peptidase 4                                     | DPP4_HUMAN  |
|  | 3.302 | 0.8254 | 1.1623   | Bile salt sulfotransferase                                 | Q06520      |
|  | 4.087 | 0.5838 | 1.1543   | Fatty acid-binding protein, brain                          | FABP7_HUMAN |
|  | 3.583 | 0.7165 | 1.15355  | Tyrosine-protein phosphatase non-receptor type 11          | PTN11_HUMAN |
|  | 3.857 | 0.6428 | 1.15061  | Alcohol dehydrogenase class-3                              | ADHX_HUMAN  |
|  | 3.721 | 0.4651 | 1.13261  | Proto-oncogene tyrosine-protein kinase ABL1                | P00519      |
|  | 3.537 | 0.5053 | 1.06557  | 72 kDa type IV collagenase                                 | MMP2_HUMAN  |
|  | 3.574 | 0.5956 | 1.0443   | Oxysterols receptor LXR-beta                               | NR1H2_HUMAN |
|  | 5.602 | 0.5602 | 1.03363  | Cellular retinoic acid-binding protein 2                   | P29373      |
|  | 3.477 | 0.5795 | 1.01206  | NAD(P)H dehydrogenase [quinone] 1                          | NQO1_HUMAN  |
|  | 3.554 | 0.8885 | 1.00516  | Vitamin D-binding protein                                  | VTDB_HUMAN  |
|  | 3.546 | 0.5066 | 0.999333 | Interleukin-2                                              | IL2_HUMAN   |
|  | 3.876 | 0.5537 | 0.998069 | Fatty acid-binding protein, heart                          | FABPH_HUMAN |

|                |       |        |          |                                                     |                 |
|----------------|-------|--------|----------|-----------------------------------------------------|-----------------|
|                |       |        |          |                                                     | MAN             |
|                | 3.666 | 0.611  | 0.986386 | E3 ubiquitin-protein ligase<br>Mdm2                 | MDM2_HU<br>MAN  |
|                | 3.662 | 0.5231 | 0.982385 | Lanosterol synthase                                 | ERG7_HU<br>MAN  |
|                | 3.271 | 0.6541 | 0.90964  | Steroid hormone receptor ERR1                       | P11474          |
|                | 3.867 | 0.2975 | 0.904763 | Endothelial protein C receptor                      | EPCR_HU<br>MAN  |
|                | 3.345 | 0.5574 | 0.896149 | Alpha-1-antitrypsin                                 | A1AT_HU<br>MAN  |
|                | 3.948 | 0.564  | 0.888853 | Lactoylglutathione lyase                            | LGUL_HU<br>MAN  |
|                | 3.731 | 0.533  | 0.871034 | Hepatocyte nuclear factor 4-<br>gamma               | Q14541          |
|                | 3.307 | 0.8268 | 0.856349 | Estrogen receptor                                   | ESR1_HUM<br>AN  |
|                | 3.711 | 0.4123 | 0.85467  | Mast/stem cell growth factor<br>receptor            | KIT_HUM<br>AN   |
|                | 3.264 | 0.6527 | 0.853726 | Glutathione S-transferase P                         | GSTP1_HU<br>MAN |
|                | 3.241 | 0.6481 | 0.845931 | Hepatocyte growth factor<br>receptor                | P08581          |
|                | 3.362 | 0.6725 | 0.837723 | Alpha-tocopherol transfer protein                   | P49638          |
|                | 3.459 | 0.5765 | 0.834082 | Tyrosine-protein kinase JAK3                        | JAK3_HUM<br>AN  |
|                | 3.979 | 0.4421 | 0.832431 | Retinoic acid receptor beta                         | RARB_HU<br>MAN  |
|                | 3.534 | 0.5049 | 0.825941 | Insulin-like growth factor IA                       | P01343          |
|                | 3.661 | 0.4067 | 0.809102 | Growth factor receptor-bound<br>protein 2           | GRB2_HU<br>MAN  |
| <b>Styrone</b> | 2.964 | 0.5928 | 1.73486  | Tyrosyl-tRNA synthetase,<br>cytoplasmic             | P54577          |
|                | 2.871 | 0.9569 | 1.51599  | Peptidyl-prolyl cis-trans<br>isomerase A            | P62937          |
|                | 2.949 | 0.5898 | 1.45586  | Mitogen-activated protein kinase<br>14              | Q16539          |
|                | 2.851 | 0.9504 | 1.38383  | Carbonic anhydrase 2                                | CAH2_HU<br>MAN  |
|                | 2.867 | 0.7168 | 1.21795  | Peroxisome proliferator-activated<br>receptor gamma | PPARG_HU<br>MAN |
|                | 2.819 | 0.5638 | 1.14256  | Phenylethanolamine N-                               | PNMT_HU         |



|                            |       |        |          |                                                  |             |
|----------------------------|-------|--------|----------|--------------------------------------------------|-------------|
|                            |       |        |          | methyltransferase                                | MAN         |
|                            | 2.825 | 0.7063 | 1.03529  | Caspase-7                                        | CASP7_HUMAN |
|                            | 2.816 | 0.5631 | 0.947914 | Estrogen-related receptor gamma                  | ERR3_HUMAN  |
|                            | 2.916 | 0.486  | 0.938374 | cAMP-specific 3,5-cyclic phosphodiesterase 4B    | PDE4B_HUMAN |
|                            | 2.901 | 0.5803 | 0.931302 | Tyrosine-protein phosphatase non-receptor type 1 | PTN1_HUMAN  |
|                            | 2.952 | 0.3691 | 0.886157 | Hepatocyte growth factor receptor                | P08581      |
|                            | 2.973 | 0.2973 | 0.834793 | SEC14-like protein 2                             | O76054      |
| <b>TAU</b>                 | 3.591 | 0.7182 | 3.35928  | Ornithine carbamoyltransferase, mitochondrial    | P00480      |
|                            | 3.565 | 0.4456 | 2.42422  | Glucose-6-phosphate isomerase                    | G6PI_HUMAN  |
|                            | 3.492 | 0.3492 | 1.83432  | Nucleoside diphosphate kinase B                  | NDKB_HUMAN  |
|                            | 3.376 | 0.3751 | 1.62613  | Non-secretory ribonuclease                       | P10153      |
|                            | 2.856 | 0.5712 | 1.18522  | Cytidine deaminase                               | CDD_HUMAN   |
|                            | 3.338 | 0.4172 | 1.03044  | Farnesyl pyrophosphate synthetase                | FPPS_HUMAN  |
|                            | 2.907 | 0.3633 | 0.991099 | Tryptase beta-2                                  | TRYB2_HUMAN |
| <b>Tetrahydroalstonine</b> | 4.674 | 0.779  | 3.41078  | Tyrosine-protein kinase JAK3                     | JAK3_HUMAN  |
|                            | 4.531 | 0.7552 | 2.95243  | Tyrosine-protein kinase ITK/TSK                  | Q08881      |
|                            | 4.614 | 0.769  | 2.9428   | Proto-oncogene tyrosine-protein kinase LCK       | LCK_HUMAN   |
|                            | 4.645 | 0.6635 | 2.93531  | MAP kinase-activated protein kinase 2            | P49137      |
|                            | 4.97  | 0.497  | 2.80511  | Retinoic acid receptor gamma                     | RARG_HUMAN  |
|                            | 3.887 | 0.9718 | 2.51831  | Nuclear receptor ROR-alpha                       | RORA_HUMAN  |
|                            | 4.44  | 0.6343 | 2.49331  | Tyrosine-protein kinase ZAP-70                   | ZAP70_HUMAN |
|                            | 3.924 | 0.7848 | 2.43113  | Histone deacetylase 8                            | Q9BY41      |
|                            | 4.641 | 0.663  | 2.3769   | Glycogen synthase kinase-3 beta                  | GSK3B_HUMAN |

|       |        |         |                                                                            |             |
|-------|--------|---------|----------------------------------------------------------------------------|-------------|
|       |        |         |                                                                            | MAN         |
| 3.814 | 0.9535 | 2.32028 | Kinesin-like protein KIF11                                                 | KIF11_HUMAN |
| 4.421 | 0.6316 | 2.23013 | Protein kinase C theta type                                                | KPCT_HUMAN  |
| 3.784 | 0.7569 | 2.21557 | Coagulation factor X                                                       | FA10_HUMAN  |
| 4.21  | 0.7016 | 2.15074 | Hepatocyte growth factor receptor                                          | MET_HUMAN   |
| 3.85  | 0.6417 | 2.11458 | Insulin-like growth factor IA                                              | P01343      |
| 4.103 | 0.5861 | 2.09965 | Protein farnesyltransferase/geranylgeranyltransferase type-1 subunit alpha | FNTA_HUMAN  |
| 3.911 | 0.7822 | 2.02202 | Sex hormone-binding globulin                                               | SHBG_HUMAN  |
| 3.844 | 0.7688 | 1.99036 | cAMP-specific 3,5-cyclic phosphodiesterase 4D                              | PDE4D_HUMAN |
| 3.978 | 0.7956 | 1.9753  | Tyrosine-protein phosphatase non-receptor type 11                          | PTN11_HUMAN |
| 3.677 | 0.7354 | 1.94033 | Prothrombin                                                                | THRB_HUMAN  |
| 3.759 | 0.3759 | 1.92614 | Tryptase beta-2                                                            | TRYB2_HUMAN |
| 3.962 | 0.566  | 1.8384  | Macrophage metalloelastase                                                 | MMP12_HUMAN |
| 3.952 | 0.7904 | 1.82477 | Wiskott-Aldrich syndrome protein                                           | WASP_HUMAN  |
| 3.647 | 0.7294 | 1.77299 | Glutathione-requiring prostaglandin D synthase                             | PTGD2_HUMAN |
| 3.622 | 0.9054 | 1.63459 | Progesterone receptor                                                      | PRGR_HUMAN  |
| 3.666 | 0.7332 | 1.60761 | Aldo-keto reductase family 1 member C1                                     | Q04828      |
| 3.863 | 0.5519 | 1.59632 | Basic fibroblast growth factor receptor 1                                  | FGFR1_HUMAN |
| 3.957 | 0.5653 | 1.58555 | S-methyl-5-thioadenosine phosphorylase                                     | Q13126      |
| 3.557 | 0.8891 | 1.57389 | Estrogen-related receptor gamma                                            | P62508      |
| 3.883 | 0.4853 | 1.55481 | Betaine--homocysteine S-methyltransferase 1                                | Q93088      |
| 3.486 | 0.8714 | 1.51128 | Mitogen-activated protein kinase                                           | Q16539      |

|       |        |         |                                                |             |
|-------|--------|---------|------------------------------------------------|-------------|
|       |        |         | 14                                             |             |
| 3.582 | 0.7164 | 1.51061 | Cell division protein kinase 2                 | P24941      |
| 3.679 | 0.7358 | 1.46036 | Estradiol 17-beta-dehydrogenase<br>1           | P14061      |
| 3.493 | 0.8733 | 1.44922 | Transthyretin                                  | TTHY_HUMAN  |
| 3.548 | 0.8871 | 1.38542 | Estrogen receptor                              | ESR1_HUMAN  |
| 3.765 | 0.4706 | 1.36522 | Interleukin-2                                  | IL2_HUMAN   |
| 3.748 | 0.7495 | 1.34611 | Corticosteroid 11-beta-dehydrogenase isozyme 1 | DH11_HUMAN  |
| 3.821 | 0.6368 | 1.33439 | Glutathione S-transferase A1                   | P08263      |
| 4.287 | 0.5359 | 1.29901 | Histamine N-methyltransferase                  | P50135      |
| 3.916 | 0.7832 | 1.27758 | Bile salt sulfotransferase                     | Q06520      |
| 3.393 | 0.6786 | 1.2709  | Placenta growth factor                         | PLGF_HUMAN  |
| 3.939 | 0.5627 | 1.22705 | Thyroid hormone receptor alpha                 | P10827      |
| 3.988 | 0.4985 | 1.22642 | Ferrochelatase, mitochondrial                  | P22830      |
| 3.634 | 0.7269 | 1.2078  | Serum albumin                                  | ALBU_HUMAN  |
| 3.822 | 0.546  | 1.20706 | Lanosterol synthase                            | ERG7_HUMAN  |
| 3.558 | 0.5083 | 1.19496 | Phospholipase A2, membrane associated          | P14555      |
| 3.66  | 0.915  | 1.19097 | Vitamin D-binding protein                      | VTDB_HUMAN  |
| 3.543 | 0.5905 | 1.1798  | Flavin reductase                               | P30043      |
| 3.812 | 0.5445 | 1.17967 | Tyrosine-protein kinase JAK2                   | JAK2_HUMAN  |
| 3.509 | 0.3898 | 1.15806 | Bcl-2-like protein 1                           | Q07817      |
| 4.022 | 0.5746 | 1.14224 | Gastrotropin                                   | FABP6_HUMAN |
| 3.55  | 0.4437 | 1.139   | Vitamin D3 receptor                            | VDR_HUMAN   |
| 3.37  | 0.5616 | 1.10238 | Ganglioside GM2 activator                      | P17900      |
| 3.389 | 0.6778 | 1.07907 | Thyroid hormone receptor beta                  | P10828      |
| 3.212 | 0.8029 | 1.0644  | Alcohol dehydrogenase 1B                       | ADH1B_HUMAN |
| 3.786 | 0.4207 | 1.05492 | Leukotriene A-4 hydrolase                      | LKHA4_HUMAN |

|                                                                     |       |        |          |                                                |              |
|---------------------------------------------------------------------|-------|--------|----------|------------------------------------------------|--------------|
|                                                                     | 3.697 | 0.6161 | 1.05221  | Trafficking protein particle complex subunit 3 | O43617       |
|                                                                     | 3.844 | 0.6406 | 1.04194  | Alcohol dehydrogenase class-3                  | ADHX_HUMAN   |
|                                                                     | 3.957 | 0.5652 | 1.01522  | Sulfotransferase family cytosolic 2B member 1  | O00204       |
|                                                                     | 3.443 | 0.5738 | 0.993557 | Oxysterols receptor LXR-beta                   | NR1H2_HUMAN  |
|                                                                     | 3.417 | 0.5695 | 0.992296 | Stromelysin-1                                  | MMP3_HUMAN   |
|                                                                     | 3.275 | 0.8188 | 0.976097 | cAMP-specific 3,5-cyclic phosphodiesterase 4B  | PDE4B_HUMAN  |
|                                                                     | 4.394 | 0.6277 | 0.976064 | Aldo-keto reductase family 1 member C2         | AK1C2_HUMAN  |
|                                                                     | 3.227 | 0.8067 | 0.954514 | TGF-beta receptor type-1                       | TGFR1_HUMAN  |
|                                                                     | 3.305 | 0.3672 | 0.949071 | Peptidyl-prolyl cis-trans isomerase FKBP1B     | FKBP1B_HUMAN |
|                                                                     | 3.113 | 0.5188 | 0.930028 | T-cell surface glycoprotein CD1a               | CD1A_HUMAN   |
|                                                                     | 3.278 | 0.4097 | 0.915544 | Heme oxygenase 1                               | HMOX1_HUMAN  |
|                                                                     | 3.649 | 0.4054 | 0.87923  | Neutrophil gelatinase-associated lipocalin     | NGAL_HUMAN   |
|                                                                     | 3.636 | 0.606  | 0.859209 | E3 ubiquitin-protein ligase Mdm2               | MDM2_HUMAN   |
|                                                                     | 3.358 | 0.5597 | 0.8517   | Leukocyte elastase                             | ELNE_HUMAN   |
|                                                                     | 3.629 | 0.5185 | 0.832818 | Cytochrome P450 2C8                            | CP2C8_HUMAN  |
|                                                                     | 3.263 | 0.8157 | 0.827019 | ADAM 17                                        | ADA17_HUMAN  |
|                                                                     | 3.417 | 0.5695 | 0.819597 | Glutathione S-transferase P                    | GSTP1_HUMAN  |
|                                                                     | 3.735 | 0.4668 | 0.810916 | Angiotensin II type 1 receptor                 | TIE2_HUMAN   |
|                                                                     | 3.446 | 0.6892 | 0.809909 | Calmodulin                                     | CALM_HUMAN   |
| <b>(24R)-4alpha-Methyl-24-ethylcholesta-7,25-dien-3beta-acetate</b> | 4.442 | 0.7403 | 2.92685  | Beta-secretase 1                               | P56817       |
|                                                                     | 3.941 | 0.9853 | 2.5689   | Nuclear receptor ROR-alpha                     | RORA_HUMAN   |

|       |        |         |                                                       |             |
|-------|--------|---------|-------------------------------------------------------|-------------|
| 4.253 | 0.8507 | 2.03324 | SEC14-like protein 2                                  | O76054      |
| 3.805 | 0.7609 | 1.9437  | cAMP-dependent protein kinase catalytic subunit alpha | P00517      |
| 3.985 | 0.6642 | 1.91316 | Oxysterols receptor LXR-alpha                         | NR1H3_HUMAN |
| 4.231 | 0.7051 | 1.8706  | Adenosine kinase                                      | P55263      |
| 5.231 | 0.5812 | 1.8368  | Cellular retinoic acid-binding protein 2              | P29373      |
| 3.804 | 0.7609 | 1.81006 | Bile acid receptor                                    | NR1H4_HUMAN |
| 3.891 | 0.7781 | 1.80896 | Prothrombin                                           | THRB_HUMAN  |
| 4.402 | 0.5503 | 1.80879 | Ferrochelatase, mitochondrial                         | P22830      |
| 4.005 | 0.5721 | 1.79922 | 72 kDa type IV collagenase                            | MMP2_HUMAN  |
| 3.958 | 0.6596 | 1.7924  | Nuclear receptor subfamily 1 group I member 3         | NR1I3_HUMAN |
| 4.079 | 0.6799 | 1.77314 | Glutathione S-transferase A1                          | P08263      |
| 4.101 | 0.6834 | 1.7313  | Trafficking protein particle complex subunit 3        | O43617      |
| 4.4   | 0.5501 | 1.72687 | Retinoic acid receptor gamma                          | RARG_HUMAN  |
| 4.133 | 0.8265 | 1.70788 | Estradiol 17-beta-dehydrogenase 1                     | P14061      |
| 3.641 | 0.6069 | 1.6638  | Ganglioside GM2 activator                             | P17900      |
| 4.096 | 0.5119 | 1.66053 | Proto-oncogene tyrosine-protein kinase ABL1           | P00519      |
| 3.649 | 0.7298 | 1.6604  | Histone deacetylase 8                                 | Q9BY41      |
| 4.112 | 0.5874 | 1.63974 | Cytochrome P450 2C8                                   | CP2C8_HUMAN |
| 3.803 | 0.6339 | 1.60737 | Receptor tyrosine-protein kinase erbB-4               | ERBB4_HUMAN |
| 3.833 | 0.7665 | 1.60678 | Calmodulin                                            | CALM_HUMAN  |
| 4.218 | 0.5272 | 1.57533 | Retinoic acid receptor alpha                          | RARA_HUMAN  |
| 3.739 | 0.6232 | 1.57039 | Flavin reductase                                      | P30043      |
| 4.245 | 0.6065 | 1.552   | Estrogen sulfotransferase                             | ST1E1_HUMAN |
| 4.361 | 0.623  | 1.50483 | Fatty acid-binding protein, heart                     | FABPH_HUMAN |

|  |       |        |         |                                                            |             |
|--|-------|--------|---------|------------------------------------------------------------|-------------|
|  | 3.972 | 0.4965 | 1.50191 | Interleukin-2                                              | IL2_HUMAN   |
|  | 3.814 | 0.7628 | 1.45233 | Wiskott-Aldrich syndrome protein                           | WASP_HUMAN  |
|  | 3.898 | 0.6497 | 1.4064  | Tyrosine-protein kinase SYK                                | KSYK_HUMAN  |
|  | 3.554 | 0.7108 | 1.38642 | Dipeptidyl peptidase 4                                     | DPP4_HUMAN  |
|  | 3.879 | 0.5541 | 1.38571 | Insulin-like growth factor IA                              | P01343      |
|  | 4.209 | 0.6013 | 1.37265 | Gastrotropin                                               | FABP6_HUMAN |
|  | 3.584 | 0.7167 | 1.37084 | Aldo-keto reductase family 1 member C1                     | Q04828      |
|  | 4.468 | 0.4964 | 1.36491 | Retinoic acid receptor beta                                | RARB_HUMAN  |
|  | 3.781 | 0.7561 | 1.34796 | Corticosteroid 11-beta-dehydrogenase isozyme 1             | DH11_HUMAN  |
|  | 4.217 | 0.6025 | 1.34408 | Sulfotransferase family cytosolic 2B member 1              | O00204      |
|  | 3.418 | 0.8545 | 1.32019 | Mineralocorticoid receptor                                 | MCR_HUMAN   |
|  | 4.698 | 0.522  | 1.31963 | Dual specificity mitogen-activated protein kinase kinase 1 | MP2K1_HUMAN |
|  | 3.63  | 0.7261 | 1.30436 | Alpha-tocopherol transfer protein                          | P49638      |
|  | 3.646 | 0.4557 | 1.30415 | Heat shock protein HSP 90-beta                             | P08238      |
|  | 4.281 | 0.6115 | 1.30087 | Fatty acid-binding protein, brain                          | FABP7_HUMAN |
|  | 3.77  | 0.4713 | 1.28629 | Vitamin D3 receptor                                        | VDR_HUMAN   |
|  | 3.701 | 0.7403 | 1.28244 | Tyrosine-protein phosphatase non-receptor type 11          | PTN11_HUMAN |
|  | 3.423 | 0.8558 | 1.24071 | Cell division protein kinase 2                             | P24941      |
|  | 3.904 | 0.7809 | 1.19286 | Bile salt sulfotransferase                                 | Q06520      |
|  | 3.491 | 0.6982 | 1.17877 | cAMP-specific 3,5-cyclic phosphodiesterase 4D              | PDE4D_HUMAN |
|  | 3.617 | 0.7235 | 1.14736 | Sorbitol dehydrogenase                                     | DHSO_HUMAN  |
|  | 3.531 | 0.3923 | 1.14058 | Bcl-2-like protein 1                                       | Q07817      |
|  | 3.831 | 0.6385 | 1.13966 | Glutathione-requiring prostaglandin D synthase             | PTGD2_HUMAN |
|  | 3.412 | 0.6823 | 1.129   | Steroid hormone receptor ERR1                              | P11474      |

|                                 |       |        |          |                                                                      |             |
|---------------------------------|-------|--------|----------|----------------------------------------------------------------------|-------------|
|                                 | 4.258 | 0.3871 | 1.10509  | Phosphatidylcholine transfer protein                                 | Q9UKL6      |
|                                 | 3.652 | 0.6086 | 1.0957   | Retinol-binding protein 4                                            | RET4_HUMAN  |
|                                 | 4.175 | 0.5219 | 1.0804   | Histamine N-methyltransferase                                        | P50135      |
|                                 | 3.875 | 0.6458 | 1.03813  | Alcohol dehydrogenase class-3                                        | ADHX_HUMAN  |
|                                 | 3.6   | 0.5142 | 1.03653  | Neutrophil gelatinase-associated lipocalin                           | NGAL_HUMAN  |
|                                 | 3.806 | 0.4229 | 1.01131  | Serine/threonine-protein phosphatase PP1-gamma catalytic subunit     | P36873      |
|                                 | 3.849 | 0.5498 | 0.95095  | Hepatocyte nuclear factor 4-gamma                                    | Q14541      |
|                                 | 4.451 | 0.4451 | 0.9502   | Retinoic acid receptor RXR-beta                                      | RXRB_HUMAN  |
|                                 | 3.337 | 0.6674 | 0.947228 | Glutathione S-transferase P                                          | GSTP1_HUMAN |
|                                 | 3.707 | 0.6178 | 0.937133 | E3 ubiquitin-protein ligase Mdm2                                     | MDM2_HUMAN  |
|                                 | 3.556 | 0.5927 | 0.932974 | Tyrosine-protein kinase JAK3                                         | JAK3_HUMAN  |
|                                 | 3.678 | 0.613  | 0.924107 | [Pyruvate dehydrogenase [lipoamide]] kinase isozyme 2, mitochondrial | PDK2_HUMAN  |
|                                 | 3.958 | 0.3045 | 0.919847 | Endothelial protein C receptor                                       | EPCR_HUMAN  |
|                                 | 4.13  | 0.5163 | 0.909869 | Glucocorticoid receptor                                              | GCR_HUMAN   |
|                                 | 3.72  | 0.4133 | 0.873498 | Leukotriene A-4 hydrolase                                            | LKHA4_HUMAN |
|                                 | 3.254 | 0.6509 | 0.826951 | Ephrin type-B receptor 4                                             | EPHB4_HUMAN |
| <b>11,14-eicosadienoic acid</b> | 4.636 | 0.4636 | 2.75318  | Retinoic acid receptor gamma                                         | RARG_HUMAN  |
|                                 | 4.534 | 0.5667 | 2.60253  | Retinoic acid receptor RXR-alpha                                     | P19793      |
|                                 | 4.419 | 0.5524 | 2.4917   | Fatty acid-binding protein, brain                                    | FABP7_HUMAN |
|                                 | 4.781 | 0.683  | 2.37677  | Aldo-keto reductase family 1 member C2                               | AK1C2_HUMAN |

|  |       |        |          |                                                     |              |
|--|-------|--------|----------|-----------------------------------------------------|--------------|
|  | 4.955 | 0.3812 | 2.05142  | Vitamin D3 receptor                                 | VDR_HUMAN    |
|  | 3.415 | 0.5691 | 2.05106  | Coagulation factor X                                | FA10_HUMAN   |
|  | 4.791 | 0.3993 | 1.89034  | Alpha-tocopherol transfer protein                   | P49638       |
|  | 3.446 | 0.5743 | 1.82616  | Flavin reductase                                    | P30043       |
|  | 3.361 | 0.6722 | 1.75821  | E3 ubiquitin-protein ligase<br>Mdm2                 | MDM2_HUMAN   |
|  | 3.314 | 0.6627 | 1.63403  | Alcohol dehydrogenase 1C                            | P00326       |
|  | 3.329 | 0.3699 | 1.59647  | Peptidyl-prolyl cis-trans<br>isomerase FKBP1B       | FKBP1B_HUMAN |
|  | 3.355 | 0.6709 | 1.56896  | Lanosterol synthase                                 | ERG7_HUMAN   |
|  | 3.429 | 0.4899 | 1.47307  | Protein S100-A9                                     | S10A9_HUMAN  |
|  | 3.362 | 0.6725 | 1.1951   | Sorbitol dehydrogenase                              | DHSO_HUMAN   |
|  | 3.342 | 0.4178 | 1.14507  | Bile acid receptor                                  | Q96R11       |
|  | 3.171 | 0.5285 | 1.0923   | Peroxisome proliferator-activated<br>receptor delta | PPARD_HUMAN  |
|  | 3.175 | 0.7938 | 1.08315  | Collagenase 3                                       | MMP13_HUMAN  |
|  | 3.318 | 0.553  | 1.04098  | Histone deacetylase 8                               | HDAC8_HUMAN  |
|  | 3.39  | 0.339  | 1.01809  | Ornithine aminotransferase,<br>mitochondrial        | OAT_HUMAN    |
|  | 3.352 | 0.4189 | 1.00138  | Betaine--homocysteine S-<br>methyltransferase 1     | Q93088       |
|  | 3.192 | 0.2455 | 0.996543 | Amine oxidase [flavin-<br>containing] A             | AOFA_HUMAN   |
|  | 3.433 | 0.4904 | 0.927657 | L-serine dehydratase                                | P20132       |
|  | 3.35  | 0.4785 | 0.88826  | Insulin-like growth factor IA                       | P01343       |
|  | 3.177 | 0.6355 | 0.885145 | Epoxide hydrolase 2                                 | HYES_HUMAN   |
|  | 3.122 | 0.5204 | 0.870546 | Thyroid hormone receptor beta-2                     | P37243       |
|  | 3.145 | 0.7864 | 0.865488 | Progesterone receptor                               | PRGR_HUMAN   |
|  | 3.408 | 0.3787 | 0.850232 | Interleukin-2                                       | IL2_HUMAN    |
|  | 3.105 | 0.6209 | 0.840729 | Macrophage metalloelastase                          | MMP12_HUMAN  |



|                                |       |        |          |                                                          |             |
|--------------------------------|-------|--------|----------|----------------------------------------------------------|-------------|
|                                | 3.439 | 0.3439 | 0.828436 | Histamine N-methyltransferase                            | P50135      |
|                                | 3.135 | 0.5225 | 0.822941 | Serine hydroxymethyltransferase,<br>cytosolic            | GLYC_HUMAN  |
|                                | 2.994 | 0.9979 | 0.808337 | Mitogen-activated protein kinase<br>1                    | MK01_HUMAN  |
| <b>24-ethylcholest-22-enol</b> | 4.216 | 0.8432 | 2.38525  | Mineralocorticoid receptor                               | MCR_HUMAN   |
|                                | 3.828 | 0.9569 | 2.36463  | Progesterone receptor                                    | PRGR_HUMAN  |
|                                | 3.768 | 0.9421 | 2.35254  | Nuclear receptor ROR-alpha                               | RORA_HUMAN  |
|                                | 4.273 | 0.8545 | 2.29529  | SEC14-like protein 2                                     | O76054      |
|                                | 4.3   | 0.6143 | 2.21343  | Lanosterol synthase                                      | ERG7_HUMAN  |
|                                | 4.579 | 0.6542 | 2.07982  | Sulfotransferase family cytosolic<br>2B member 1         | O00204      |
|                                | 4.223 | 0.8445 | 2.07862  | Estradiol 17-beta-dehydrogenase<br>1                     | P14061      |
|                                | 3.806 | 0.7612 | 2.01494  | Bile acid receptor                                       | NR1H4_HUMAN |
|                                | 3.719 | 0.9297 | 2.00493  | Collagenase 3                                            | MMP13_HUMAN |
|                                | 3.746 | 0.7493 | 2.00172  | cAMP-dependent protein kinase<br>catalytic subunit alpha | P00517      |
|                                | 3.702 | 0.7405 | 1.99459  | Histone deacetylase 8                                    | Q9BY41      |
|                                | 4.416 | 0.552  | 1.95225  | Retinoic acid receptor gamma                             | RARG_HUMAN  |
|                                | 4.095 | 0.6825 | 1.91865  | Trafficking protein particle<br>complex subunit 3        | O43617      |
|                                | 4.36  | 0.6228 | 1.86551  | Mitogen-activated protein kinase<br>10                   | MK10_HUMAN  |
|                                | 3.897 | 0.6496 | 1.75728  | Retinol-binding protein 4                                | RET4_HUMAN  |
|                                | 3.875 | 0.775  | 1.74171  | Corticosteroid 11-beta-<br>dehydrogenase isozyme 1       | DH11_HUMAN  |
|                                | 3.903 | 0.6505 | 1.6156   | Glutathione S-transferase A1                             | P08263      |
|                                | 4.302 | 0.717  | 1.60011  | Sex hormone-binding globulin                             | SHBG_HUMAN  |
|                                | 3.781 | 0.6302 | 1.5422   | Ephrin type-B receptor 4                                 | EPHB4_HUMAN |
|                                | 3.955 | 0.6591 | 1.53376  | Adenosine kinase                                         | P55263      |

|  |       |        |         |                                                            |             |
|--|-------|--------|---------|------------------------------------------------------------|-------------|
|  | 3.564 | 0.7129 | 1.47788 | Aldo-keto reductase family 1 member C1                     | Q04828      |
|  | 3.661 | 0.4068 | 1.46232 | Phosphatidylinositol 3-kinase regulatory subunit alpha     | P85A_HUMAN  |
|  | 4.665 | 0.5184 | 1.45777 | Dual specificity mitogen-activated protein kinase kinase 1 | MP2K1_HUMAN |
|  | 3.686 | 0.7371 | 1.42662 | Tyrosine-protein phosphatase non-receptor type 11          | PTN11_HUMAN |
|  | 3.948 | 0.4387 | 1.41335 | Growth factor receptor-bound protein 2                     | GRB2_HUMAN  |
|  | 3.881 | 0.5544 | 1.39454 | Cytochrome P450 2C8                                        | CP2C8_HUMAN |
|  | 3.649 | 0.7298 | 1.36911 | Calmodulin                                                 | CALM_HUMAN  |
|  | 3.606 | 0.5152 | 1.34892 | Protein S100-A9                                            | S10A9_HUMAN |
|  | 4.27  | 0.427  | 1.32119 | Vitamin D3 receptor                                        | VDR_HUMAN   |
|  | 3.811 | 0.4764 | 1.32019 | Proto-oncogene tyrosine-protein kinase ABL1                | P00519      |
|  | 4.067 | 0.3129 | 1.26083 | Endothelial protein C receptor                             | EPCR_HUMAN  |
|  | 3.939 | 0.4924 | 1.24805 | Ferrochelatase, mitochondrial                              | P22830      |
|  | 3.837 | 0.4796 | 1.24072 | Caspase-3                                                  | CASP3_HUMAN |
|  | 3.637 | 0.7274 | 1.23474 | Wiskott-Aldrich syndrome protein                           | WASP_HUMAN  |
|  | 3.539 | 0.5899 | 1.19409 | Receptor tyrosine-protein kinase erbB-4                    | ERBB4_HUMAN |
|  | 3.591 | 0.5129 | 1.19134 | 72 kDa type IV collagenase                                 | MMP2_HUMAN  |
|  | 3.764 | 0.6274 | 1.17094 | Glutathione-requiring prostaglandin D synthase             | PTGD2_HUMAN |
|  | 3.496 | 0.5826 | 1.1549  | Flavin reductase                                           | P30043      |
|  | 3.601 | 0.6001 | 1.12959 | Oxysterols receptor LXR-beta                               | NR1H2_HUMAN |
|  | 3.628 | 0.6047 | 1.09513 | Proto-oncogene tyrosine-protein kinase LCK                 | LCK_HUMAN   |
|  | 4.132 | 0.3756 | 1.08409 | Phosphatidylcholine transfer protein                       | Q9UKL6      |
|  | 3.92  | 0.56   | 1.0807  | Gastrotropin                                               | FABP6_HUMAN |

|                                     |       |        |          |                                          |             |
|-------------------------------------|-------|--------|----------|------------------------------------------|-------------|
|                                     |       |        |          |                                          | MAN         |
|                                     | 3.329 | 0.6659 | 1.06936  | Steroid hormone receptor ERR1            | P11474      |
|                                     | 4.397 | 0.4397 | 1.03765  | Retinoic acid receptor RXR-beta          | RXRB_HUMAN  |
|                                     | 3.396 | 0.566  | 1.03269  | Alpha-1-antitrypsin                      | A1AT_HUMAN  |
|                                     | 5.593 | 0.5593 | 1.02925  | Cellular retinoic acid-binding protein 2 | P29373      |
|                                     | 3.955 | 0.4394 | 1.0244   | Angiopoietin-1 receptor                  | TIE2_HUMAN  |
|                                     | 3.597 | 0.5139 | 0.978935 | Tyrosine-protein kinase ZAP-70           | ZAP70_HUMAN |
|                                     | 3.486 | 0.581  | 0.973469 | Oxysterols receptor LXR-alpha            | NR1H3_HUMAN |
|                                     | 3.301 | 0.6601 | 0.969257 | Dipeptidyl peptidase 4                   | DPP4_HUMAN  |
|                                     | 3.763 | 0.5375 | 0.949712 | Hepatocyte nuclear factor 4-gamma        | Q14541      |
|                                     | 3.573 | 0.5104 | 0.931599 | Insulin-like growth factor IA            | P01343      |
|                                     | 3.501 | 0.8754 | 0.901845 | Vitamin D-binding protein                | VTDB_HUMAN  |
|                                     | 3.389 | 0.4236 | 0.894405 | Heat shock protein HSP 90-beta           | P08238      |
|                                     | 3.693 | 0.6155 | 0.855751 | Alcohol dehydrogenase class-3            | ADHX_HUMAN  |
|                                     | 3.508 | 0.5846 | 0.848496 | Tyrosine-protein kinase ITK/TSK          | Q08881      |
|                                     | 3.961 | 0.4401 | 0.820917 | Retinoic acid receptor beta              | RARB_HUMAN  |
|                                     | 3.44  | 0.5733 | 0.818556 | Tyrosine-protein kinase JAK3             | JAK3_HUMAN  |
|                                     | 3.862 | 0.5518 | 0.801836 | Fatty acid-binding protein, brain        | FABP7_HUMAN |
| <b>24-ethylcholesta-5,22-dienol</b> | 4.619 | 0.5133 | 2.62627  | Growth factor receptor-bound protein 2   | GRB2_HUMAN  |
|                                     | 4.495 | 0.8991 | 2.46644  | Estradiol 17-beta-dehydrogenase 1        | P14061      |
|                                     | 3.847 | 0.9618 | 2.42295  | Nuclear receptor ROR-alpha               | RORA_HUMAN  |
|                                     | 4.367 | 0.8734 | 2.35145  | SEC14-like protein 2                     | O76054      |
|                                     | 3.873 | 0.9683 | 2.34253  | Progesterone receptor                    | PRGR_HUMAN  |

|  |       |        |         |                                                        |             |
|--|-------|--------|---------|--------------------------------------------------------|-------------|
|  | 3.873 | 0.7746 | 2.30948 | Histone deacetylase 8                                  | Q9BY41      |
|  | 3.827 | 0.9569 | 2.19872 | Mineralocorticoid receptor                             | MCR_HUMAN   |
|  | 4.509 | 0.6442 | 1.86243 | Sulfotransferase family cytosolic 2B member 1          | O00204      |
|  | 4.125 | 0.6875 | 1.86097 | Trafficking protein particle complex subunit 3         | O43617      |
|  | 4.074 | 0.679  | 1.8509  | Glutathione S-transferase A1                           | P08263      |
|  | 3.893 | 0.7785 | 1.8228  | Calmodulin                                             | CALM_HUMAN  |
|  | 3.945 | 0.789  | 1.77562 | Corticosteroid 11-beta-dehydrogenase isozyme 1         | DH11_HUMAN  |
|  | 3.751 | 0.7503 | 1.75993 | Bile acid receptor                                     | NR1H4_HUMAN |
|  | 3.639 | 0.9097 | 1.71248 | Collagenase 3                                          | MMP13_HUMAN |
|  | 5.235 | 0.6544 | 1.69424 | Retinol-binding protein 4                              | RET4_HUMAN  |
|  | 3.663 | 0.7326 | 1.6777  | cAMP-dependent protein kinase catalytic subunit alpha  | P00517      |
|  | 4.087 | 0.5839 | 1.67626 | Cytochrome P450 2C8                                    | CP2C8_HUMAN |
|  | 4.402 | 0.7336 | 1.65    | Sex hormone-binding globulin                           | SHBG_HUMAN  |
|  | 4.053 | 0.5066 | 1.55596 | Caspase-3                                              | CASP3_HUMAN |
|  | 4.506 | 0.4096 | 1.55171 | Phosphatidylcholine transfer protein                   | Q9UKL6      |
|  | 4.198 | 0.5247 | 1.4949  | Retinoic acid receptor gamma                           | RARG_HUMAN  |
|  | 3.988 | 0.6646 | 1.48686 | Adenosine kinase                                       | P55263      |
|  | 3.695 | 0.6158 | 1.47343 | Peroxisome proliferator-activated receptor alpha       | PPARA_HUMAN |
|  | 3.559 | 0.7118 | 1.44384 | Dipeptidyl peptidase 4                                 | DPP4_HUMAN  |
|  | 4.117 | 0.5147 | 1.44308 | Ferrochelatase, mitochondrial                          | P22830      |
|  | 3.741 | 0.7482 | 1.43917 | Tyrosine-protein phosphatase non-receptor type 11      | PTN11_HUMAN |
|  | 3.7   | 0.4111 | 1.43896 | Phosphatidylinositol 3-kinase regulatory subunit alpha | P85A_HUMAN  |
|  | 3.672 | 0.459  | 1.41474 | Heat shock protein HSP 90-beta                         | P08238      |

|  |       |        |         |                                                                |             |
|--|-------|--------|---------|----------------------------------------------------------------|-------------|
|  | 3.665 | 0.6108 | 1.37195 | Receptor tyrosine-protein kinase<br>erbB-4                     | ERBB4_HUMAN |
|  | 4.659 | 0.5177 | 1.35683 | Dual specificity mitogen-<br>activated protein kinase kinase 1 | MP2K1_HUMAN |
|  | 4.15  | 0.5928 | 1.35627 | Gastrotropin                                                   | FABP6_HUMAN |
|  | 3.605 | 0.6008 | 1.31294 | Flavin reductase                                               | P30043      |
|  | 4.328 | 0.4328 | 1.31145 | Vitamin D3 receptor                                            | VDR_HUMAN   |
|  | 3.801 | 0.543  | 1.28512 | Tyrosine-protein kinase ZAP-70                                 | ZAP70_HUMAN |
|  | 3.697 | 0.6162 | 1.26606 | Ephrin type-B receptor 4                                       | EPHB4_HUMAN |
|  | 3.828 | 0.638  | 1.23923 | E3 ubiquitin-protein ligase<br>Mdm2                            | MDM2_HUMAN  |
|  | 3.536 | 0.5894 | 1.23737 | Alpha-1-antitrypsin                                            | A1AT_HUMAN  |
|  | 3.832 | 0.6387 | 1.20005 | Glutathione-requiring<br>prostaglandin D synthase              | PTGD2_HUMAN |
|  | 3.792 | 0.4739 | 1.1902  | Proto-oncogene tyrosine-protein<br>kinase ABL1                 | P00519      |
|  | 3.478 | 0.6955 | 1.18914 | Aldo-keto reductase family 1<br>member C1                      | Q04828      |
|  | 3.592 | 0.5986 | 1.17625 | NAD(P)H dehydrogenase<br>[quinone] 1                           | NQO1_HUMAN  |
|  | 3.907 | 0.6511 | 1.1631  | Alcohol dehydrogenase class-3                                  | ADHX_HUMAN  |
|  | 3.615 | 0.6024 | 1.15405 | Mitogen-activated protein kinase<br>10                         | P53779      |
|  | 4.059 | 0.3122 | 1.14939 | Endothelial protein C receptor                                 | EPCR_HUMAN  |
|  | 3.602 | 0.5146 | 1.12416 | 72 kDa type IV collagenase                                     | MMP2_HUMAN  |
|  | 3.889 | 0.5556 | 1.08226 | Hepatocyte nuclear factor 4-<br>gamma                          | Q14541      |
|  | 3.74  | 0.5343 | 1.0575  | Lanosterol synthase                                            | ERG7_HUMAN  |
|  | 3.366 | 0.6732 | 1.0565  | Glutathione S-transferase P                                    | GSTP1_HUMAN |
|  | 4.076 | 0.5823 | 1.05647 | Fatty acid-binding protein, brain                              | FABP7_HUMAN |

|                                          |        |         |                            |                                                  |              |
|------------------------------------------|--------|---------|----------------------------|--------------------------------------------------|--------------|
|                                          | 3.564  | 0.594   | 1.04959                    | Oxysterols receptor LXR-alpha                    | NR1H3_HUMAN  |
|                                          | 3.863  | 0.4828  | 1.04111                    | Retinoic acid receptor alpha                     | RARA_HUMAN   |
|                                          | 3.67   | 0.6117  | 1.01578                    | Tyrosine-protein kinase SYK                      | KSYK_HUMAN   |
|                                          | 3.337  | 0.6673  | 0.998714                   | Steroid hormone receptor ERR1                    | P11474       |
|                                          | 3.603  | 0.6006  | 0.947067                   | Proto-oncogene tyrosine-protein kinase LCK       | LCK_HUMAN    |
|                                          | 3.52   | 0.5866  | 0.909362                   | Nuclear receptor subfamily 1 group I member 3    | NR1I3_HUMAN  |
|                                          | 4.355  | 0.4355  | 0.905455                   | Retinoic acid receptor RXR-beta                  | RXRβ_HUMAN   |
|                                          | 3.538  | 0.5897  | 0.892643                   | Oxysterols receptor LXR-beta                     | NR1H2_HUMAN  |
|                                          | 3.51   | 0.5851  | 0.878404                   | Tyrosine-protein kinase JAK3                     | JAK3_HUMAN   |
|                                          | 3.5    | 0.5     | 0.843112                   | Interleukin-2                                    | IL2_HUMAN    |
|                                          | 3.816  | 0.5452  | 0.808539                   | Fatty acid-binding protein, heart                | FABPH_HUMAN  |
| <b>24-methyl-31-norlanost-9(11)-enol</b> | 4.841  | 0.6916  | 2.71808                    | cAMP-specific 3,5-cyclic phosphodiesterase 4D    | PDE4D_HUMAN  |
|                                          | 4.259  | 0.6084  | 2.48173                    | Protein S100-A9                                  | S100A9_HUMAN |
|                                          | 4.399  | 0.6285  | 2.44267                    | Renin                                            | RENI_HUMAN   |
|                                          | 4      | 0.6667  | 2.32419                    | Ganglioside GM2 activator                        | P17900       |
|                                          | 4.373  | 0.8746  | 2.11836                    | SEC14-like protein 2                             | O76054       |
|                                          | 4.063  | 0.6772  | 2.07535                    | Peroxisome proliferator-activated receptor alpha | PPARA_HUMAN  |
|                                          | 3.949  | 0.7899  | 1.97276                    | Bile acid receptor                               | NR1H4_HUMAN  |
|                                          | 4.297  | 0.7161  | 1.94139                    | E3 ubiquitin-protein ligase Mdm2                 | MDM2_HUMAN   |
|                                          | 4.153  | 0.6922  | 1.87409                    | Dipeptidyl peptidase 4                           | DPP4_HUMAN   |
|                                          | 4.251  | 0.7085  | 1.87015                    | Trafficking protein particle complex subunit 3   | O43617       |
| 3.955                                    | 0.9888 | 1.85146 | Kinesin-like protein KIF11 | KIF11_HUMAN                                      |              |

|  |       |        |         |                                                                  |             |
|--|-------|--------|---------|------------------------------------------------------------------|-------------|
|  | 3.721 | 0.9303 | 1.8437  | Nuclear receptor ROR-alpha                                       | RORA_HUMAN  |
|  | 3.979 | 0.4974 | 1.84108 | Heat shock protein HSP 90-beta                                   | P08238      |
|  | 4.381 | 0.6258 | 1.73298 | Hepatocyte nuclear factor 4-gamma                                | Q14541      |
|  | 3.929 | 0.7859 | 1.72323 | Prothrombin                                                      | THRB_HUMAN  |
|  | 4.753 | 0.4321 | 1.71569 | Serine/threonine-protein phosphatase PP1-gamma catalytic subunit | P36873      |
|  | 3.709 | 0.7419 | 1.70366 | Glutathione S-transferase P                                      | GSTP1_HUMAN |
|  | 4.208 | 0.6012 | 1.6794  | Cytochrome P450 2C8                                              | CP2C8_HUMAN |
|  | 4.468 | 0.3437 | 1.60846 | Endothelial protein C receptor                                   | EPCR_HUMAN  |
|  | 4.979 | 0.5532 | 1.56459 | Dual specificity mitogen-activated protein kinase kinase 1       | MP2K1_HUMAN |
|  | 5.278 | 0.6597 | 1.56242 | Retinol-binding protein 4                                        | RET4_HUMAN  |
|  | 3.792 | 0.632  | 1.52339 | Flavin reductase                                                 | P30043      |
|  | 4.014 | 0.669  | 1.5034  | Glutathione S-transferase A1                                     | P08263      |
|  | 3.907 | 0.5581 | 1.49393 | 72 kDa type IV collagenase                                       | MMP2_HUMAN  |
|  | 3.934 | 0.5619 | 1.48254 | Interleukin-2                                                    | IL2_HUMAN   |
|  | 4.081 | 0.6802 | 1.44559 | Adenosine kinase                                                 | P55263      |
|  | 4.405 | 0.4895 | 1.42435 | Angiopoietin-1 receptor                                          | TIE2_HUMAN  |
|  | 3.87  | 0.774  | 1.4153  | Wiskott-Aldrich syndrome protein                                 | WASP_HUMAN  |
|  | 3.616 | 0.7231 | 1.39687 | Histone deacetylase 8                                            | Q9BY41      |
|  | 4.014 | 0.5017 | 1.39115 | Proto-oncogene tyrosine-protein kinase ABL1                      | P00519      |
|  | 4.105 | 0.4561 | 1.38511 | Growth factor receptor-bound protein 2                           | GRB2_HUMAN  |
|  | 4.515 | 0.5017 | 1.3284  | Retinoic acid receptor beta                                      | RARB_HUMAN  |
|  | 3.917 | 0.6528 | 1.30083 | Tyrosine-protein kinase SYK                                      | KSYK_HUMAN  |
|  | 3.775 | 0.6292 | 1.29955 | Oxysterols receptor LXR-alpha                                    | NR1H3_HUMAN |

|       |        |          |                                                           |                 |
|-------|--------|----------|-----------------------------------------------------------|-----------------|
|       |        |          |                                                           | MAN             |
| 4.256 | 0.6079 | 1.29328  | Sulfotransferase family cytosolic<br>2B member 1          | O00204          |
| 3.761 | 0.7521 | 1.28423  | Calmodulin                                                | CALM_HU<br>MAN  |
| 3.798 | 0.9494 | 1.27014  | Vitamin D-binding protein                                 | VTDB_HU<br>MAN  |
| 3.881 | 0.6468 | 1.26886  | Hepatocyte growth factor<br>receptor                      | MET_HUM<br>AN   |
| 4.441 | 0.4037 | 1.26099  | Phosphatidylcholine transfer<br>protein                   | Q9UUKL6         |
| 4.513 | 0.5642 | 1.25847  | Fatty acid-binding protein, heart                         | FABPH_HU<br>MAN |
| 3.893 | 0.4866 | 1.25672  | 3-hydroxy-3-methylglutaryl-<br>coenzyme A reductase       | HMDH_HU<br>MAN  |
| 4.323 | 0.6176 | 1.252    | Fatty acid-binding protein, brain                         | FABP7_HU<br>MAN |
| 3.681 | 0.4602 | 1.19467  | Vitamin D3 receptor                                       | VDR_HUM<br>AN   |
| 4.384 | 0.548  | 1.15339  | Glucocorticoid receptor                                   | GCR_HUM<br>AN   |
| 4.697 | 0.4697 | 1.14708  | Retinoic acid receptor RXR-beta                           | RXRB_HU<br>MAN  |
| 3.67  | 0.4078 | 1.14294  | Phosphatidylinositol 3-kinase<br>regulatory subunit alpha | P85A_HUM<br>AN  |
| 3.604 | 0.6007 | 1.13783  | Tyrosine-protein phosphatase<br>non-receptor type 1       | PTN1_HU<br>MAN  |
| 3.899 | 0.6499 | 1.13081  | Glutathione-requiring<br>prostaglandin D synthase         | PTGD2_HU<br>MAN |
| 3.686 | 0.7372 | 1.0872   | Tyrosine-protein phosphatase<br>non-receptor type 11      | PTN11_HU<br>MAN |
| 4.085 | 0.5836 | 1.07326  | Gastrotropin                                              | FABP6_HU<br>MAN |
| 3.723 | 0.7446 | 1.07273  | Corticosteroid 11-beta-<br>dehydrogenase isozyme 1        | DHI1_HUM<br>AN  |
| 3.966 | 0.3606 | 1.0705   | Caspase-1                                                 | CASP1_HU<br>MAN |
| 3.743 | 0.5347 | 0.978141 | Tyrosine-protein kinase ZAP-70                            | ZAP70_HU<br>MAN |
| 3.404 | 0.6807 | 0.960505 | Steroid hormone receptor ERR1                             | P11474          |
| 3.769 | 0.6282 | 0.95958  | [Pyruvate dehydrogenase                                   | PDK2_HU         |



|                                                           |       |        |          |                                              |             |
|-----------------------------------------------------------|-------|--------|----------|----------------------------------------------|-------------|
|                                                           |       |        |          | [lipoamide]] kinase isozyme 2, mitochondrial | MAN         |
|                                                           | 3.397 | 0.4247 | 0.955421 | Heme oxygenase 1                             | HMOX1_HUMAN |
|                                                           | 3.637 | 0.5196 | 0.955378 | Neutrophil gelatinase-associated lipocalin   | NGAL_HUMAN  |
|                                                           | 3.917 | 0.4896 | 0.951895 | Ferrochelatase, mitochondrial                | P22830      |
|                                                           | 3.531 | 0.7062 | 0.948088 | Alpha-tocopherol transfer protein            | P49638      |
|                                                           | 3.634 | 0.6057 | 0.896048 | Oxysterols receptor LXR-beta                 | NR1H2_HUMAN |
|                                                           | 3.811 | 0.7623 | 0.886215 | Bile salt sulfotransferase                   | Q06520      |
|                                                           | 3.57  | 0.51   | 0.87814  | Basic fibroblast growth factor receptor 1    | FGFR1_HUMAN |
|                                                           | 3.75  | 0.5357 | 0.875328 | Protein kinase C theta type                  | KPCT_HUMAN  |
|                                                           | 3.563 | 0.7125 | 0.864243 | Mineralocorticoid receptor                   | MCR_HUMAN   |
|                                                           | 4.094 | 0.5118 | 0.854761 | Histamine N-methyltransferase                | P50135      |
|                                                           | 3.476 | 0.3862 | 0.848878 | Bcl-2-like protein 1                         | Q07817      |
|                                                           | 5.595 | 0.5595 | 0.836732 | Cellular retinoic acid-binding protein 2     | P29373      |
|                                                           | 3.832 | 0.479  | 0.807156 | Retinoic acid receptor alpha                 | RARA_HUMAN  |
| <b>24-Methylcholest-5-enyl-3beta-O-glucopyranoside_qt</b> | 4.636 | 0.4636 | 2.75318  | Retinoic acid receptor gamma                 | RARG_HUMAN  |
|                                                           | 4.534 | 0.5667 | 2.60253  | Retinoic acid receptor RXR-alpha             | P19793      |
|                                                           | 4.419 | 0.5524 | 2.4917   | Fatty acid-binding protein, brain            | FABP7_HUMAN |
|                                                           | 4.781 | 0.683  | 2.37677  | Aldo-keto reductase family 1 member C2       | AK1C2_HUMAN |
|                                                           | 4.955 | 0.3812 | 2.05142  | Vitamin D3 receptor                          | VDR_HUMAN   |
|                                                           | 3.415 | 0.5691 | 2.05106  | Coagulation factor X                         | FA10_HUMAN  |
|                                                           | 4.791 | 0.3993 | 1.89034  | Alpha-tocopherol transfer protein            | P49638      |
|                                                           | 3.446 | 0.5743 | 1.82616  | Flavin reductase                             | P30043      |
|                                                           | 3.361 | 0.6722 | 1.75821  | E3 ubiquitin-protein ligase Mdm2             | MDM2_HUMAN  |
|                                                           | 3.314 | 0.6627 | 1.63403  | Alcohol dehydrogenase 1C                     | P00326      |
|                                                           | 3.329 | 0.3699 | 1.59647  | Peptidyl-prolyl cis-trans                    | FKB1B_HUMAN |

|                                  |       |        |          |                                                     |                 |
|----------------------------------|-------|--------|----------|-----------------------------------------------------|-----------------|
|                                  |       |        |          | isomerase FKBP1B                                    | MAN             |
|                                  | 3.355 | 0.6709 | 1.56896  | Lanosterol synthase                                 | ERG7_HU<br>MAN  |
|                                  | 3.429 | 0.4899 | 1.47307  | Protein S100-A9                                     | S10A9_HU<br>MAN |
|                                  | 3.362 | 0.6725 | 1.1951   | Sorbitol dehydrogenase                              | DHSO_HU<br>MAN  |
|                                  | 3.342 | 0.4178 | 1.14507  | Bile acid receptor                                  | Q96R11          |
|                                  | 3.171 | 0.5285 | 1.0923   | Peroxisome proliferator-activated<br>receptor delta | PPARD_HU<br>MAN |
|                                  | 3.175 | 0.7938 | 1.08315  | Collagenase 3                                       | MMP13_H<br>UMAN |
|                                  | 3.318 | 0.553  | 1.04098  | Histone deacetylase 8                               | HDAC8_H<br>UMAN |
|                                  | 3.39  | 0.339  | 1.01809  | Ornithine aminotransferase,<br>mitochondrial        | OAT_HUM<br>AN   |
|                                  | 3.352 | 0.4189 | 1.00138  | Betaine--homocysteine S-<br>methyltransferase 1     | Q93088          |
|                                  | 3.192 | 0.2455 | 0.996543 | Amine oxidase [flavin-<br>containing] A             | AOFA_HU<br>MAN  |
|                                  | 3.433 | 0.4904 | 0.927657 | L-serine dehydratase                                | P20132          |
|                                  | 3.35  | 0.4785 | 0.88826  | Insulin-like growth factor IA                       | P01343          |
|                                  | 3.177 | 0.6355 | 0.885145 | Epoxide hydrolase 2                                 | HYES_HU<br>MAN  |
|                                  | 3.122 | 0.5204 | 0.870546 | Thyroid hormone receptor beta-2                     | P37243          |
|                                  | 3.145 | 0.7864 | 0.865488 | Progesterone receptor                               | PRGR_HU<br>MAN  |
|                                  | 3.408 | 0.3787 | 0.850232 | Interleukin-2                                       | IL2_HUMA<br>N   |
|                                  | 3.105 | 0.6209 | 0.840729 | Macrophage metalloelastase                          | MMP12_H<br>UMAN |
|                                  | 3.439 | 0.3439 | 0.828436 | Histamine N-methyltransferase                       | P50135          |
|                                  | 3.135 | 0.5225 | 0.822941 | Serine hydroxymethyltransferase,<br>cytosolic       | GLYC_HU<br>MAN  |
|                                  | 2.994 | 0.9979 | 0.808337 | Mitogen-activated protein kinase<br>1               | MK01_HU<br>MAN  |
| <b>24-methylenelanost-8-enol</b> | 4.363 | 0.7272 | 2.47347  | Trafficking protein particle<br>complex subunit 3   | O43617          |
|                                  | 3.757 | 0.9392 | 2.36402  | Nuclear receptor ROR-alpha                          | RORA_HU<br>MAN  |
|                                  | 4.218 | 0.703  | 2.19337  | E3 ubiquitin-protein ligase                         | MDM2_HU         |

|       |        |         |                                                            |             |
|-------|--------|---------|------------------------------------------------------------|-------------|
|       |        |         | Mdm2                                                       | MAN         |
| 4.22  | 0.6028 | 2.17939 | B-Raf proto-oncogene serine/threonine-protein kinase       | BRAF1_HUMAN |
| 4.464 | 0.5581 | 2.13773 | Ferrochelatase, mitochondrial                              | P22830      |
| 4.174 | 0.8349 | 2.13033 | SEC14-like protein 2                                       | O76054      |
| 3.816 | 0.7633 | 2.07634 | Aldo-keto reductase family 1 member C1                     | Q04828      |
| 3.812 | 0.7623 | 2.06693 | Bile acid receptor                                         | NR1H4_HUMAN |
| 3.619 | 0.7238 | 1.89106 | Glutathione S-transferase P                                | GSTP1_HUMAN |
| 3.925 | 0.7849 | 1.85306 | Mineralocorticoid receptor                                 | MCR_HUMAN   |
| 4.854 | 0.5393 | 1.7202  | Dual specificity mitogen-activated protein kinase kinase 1 | MP2K1_HUMAN |
| 3.575 | 0.5107 | 1.69588 | 3-hydroxy-3-methylglutaryl-coenzyme A reductase            | HMDH_HUMAN  |
| 3.893 | 0.4866 | 1.65538 | Stromelysin-1                                              | MMP3_HUMAN  |
| 4.518 | 0.502  | 1.64    | Retinoic acid receptor beta                                | RARB_HUMAN  |
| 3.784 | 0.7567 | 1.57138 | Corticosteroid 11-beta-dehydrogenase isozyme 1             | DH11_HUMAN  |
| 4.118 | 0.5883 | 1.55249 | Estrogen sulfotransferase                                  | ST1E1_HUMAN |
| 3.753 | 0.5361 | 1.5299  | 72 kDa type IV collagenase                                 | MMP2_HUMAN  |
| 4.156 | 0.5937 | 1.48944 | Gastrotropin                                               | FABP6_HUMAN |
| 3.622 | 0.7244 | 1.47788 | Alpha-tocopherol transfer protein                          | P49638      |
| 3.904 | 0.5576 | 1.46817 | Cytochrome P450 2C8                                        | CP2C8_HUMAN |
| 3.482 | 0.6963 | 1.4469  | Histone deacetylase 8                                      | Q9BY41      |
| 4.012 | 0.5732 | 1.43371 | Hepatocyte nuclear factor 4-gamma                          | Q14541      |
| 3.659 | 0.7318 | 1.42914 | Calmodulin                                                 | CALM_HUMAN  |
| 3.797 | 0.5424 | 1.42866 | Insulin-like growth factor IA                              | P01343      |
| 4.147 | 0.319  | 1.42306 | Endothelial protein C receptor                             | EPCR_HUMAN  |
| 3.878 | 0.6463 | 1.40746 | Glutathione-requiring                                      | PTGD2_HUMAN |

|       |        |         |                                                                            |             |
|-------|--------|---------|----------------------------------------------------------------------------|-------------|
|       |        |         | prostaglandin D synthase                                                   | MAN         |
| 3.612 | 0.602  | 1.39453 | Receptor tyrosine-protein kinase<br>erbB-4                                 | ERBB4_HUMAN |
| 3.829 | 0.4787 | 1.38224 | Proto-oncogene tyrosine-protein<br>kinase ABL1                             | P00519      |
| 4.099 | 0.5856 | 1.35566 | Sulfotransferase family cytosolic<br>2B member 1                           | O00204      |
| 3.758 | 0.5368 | 1.35538 | Retinoic acid receptor gamma                                               | RARG_HUMAN  |
| 4.308 | 0.5385 | 1.34176 | Glucocorticoid receptor                                                    | GCR_HUMAN   |
| 3.371 | 0.5619 | 1.29538 | cGMP-specific 3,5-cyclic<br>phosphodiesterase                              | PDE5A_HUMAN |
| 3.607 | 0.6011 | 1.28953 | Oxysterols receptor LXR-alpha                                              | NR1H3_HUMAN |
| 3.889 | 0.3535 | 1.27243 | Caspase-1                                                                  | CASP1_HUMAN |
| 3.83  | 0.4256 | 1.26083 | Serine/threonine-protein<br>phosphatase PP1-gamma<br>catalytic subunit     | P36873      |
| 3.624 | 0.604  | 1.21362 | Oxysterols receptor LXR-beta                                               | NR1H2_HUMAN |
| 3.694 | 0.6157 | 1.21128 | Glutathione S-transferase A1                                               | P08263      |
| 3.745 | 0.749  | 1.19473 | Estradiol 17-beta-dehydrogenase<br>1                                       | P14061      |
| 3.571 | 0.7143 | 1.18865 | Tyrosine-protein phosphatase<br>non-receptor type 11                       | PTN11_HUMAN |
| 3.706 | 0.6176 | 1.17072 | [Pyruvate dehydrogenase<br>[lipoamide]] kinase isozyme 2,<br>mitochondrial | PDK2_HUMAN  |
| 3.585 | 0.8963 | 1.15031 | Vitamin D-binding protein                                                  | VTDB_HUMAN  |
| 3.981 | 0.6636 | 1.14378 | Sex hormone-binding globulin                                               | SHBG_HUMAN  |
| 3.605 | 0.6008 | 1.14221 | Dipeptidyl peptidase 4                                                     | DPP4_HUMAN  |
| 4.61  | 0.5763 | 1.1204  | Retinol-binding protein 4                                                  | RET4_HUMAN  |
| 3.552 | 0.592  | 1.10917 | Tyrosine-protein kinase JAK3                                               | JAK3_HUMAN  |
| 3.648 | 0.6079 | 1.10146 | Tyrosine-protein kinase SYK                                                | KSYK_HUMAN  |

|                            |       |        |          |                                                        |                  |
|----------------------------|-------|--------|----------|--------------------------------------------------------|------------------|
|                            |       |        |          |                                                        | MAN              |
|                            | 3.556 | 0.7112 | 1.08206  | Wiskott-Aldrich syndrome protein                       | WASP_HU<br>MAN   |
|                            | 3.537 | 0.5895 | 1.08189  | Nuclear receptor subfamily 1 group 1 member 3          | NR1I3_HU<br>MAN  |
|                            | 3.788 | 0.4735 | 1.02897  | Retinoic acid receptor alpha                           | RARA_HU<br>MAN   |
|                            | 3.352 | 0.5586 | 0.97003  | Alpha-1-antitrypsin                                    | A1AT_HU<br>MAN   |
|                            | 3.828 | 0.5468 | 0.968446 | Mitogen-activated protein kinase 10                    | MK10_HU<br>MAN   |
|                            | 3.499 | 0.4998 | 0.958747 | Interleukin-2                                          | IL2_HUMA<br>N    |
|                            | 3.268 | 0.5446 | 0.9539   | Ganglioside GM2 activator                              | P17900           |
|                            | 3.397 | 0.5662 | 0.942851 | Flavin reductase                                       | P30043           |
|                            | 3.474 | 0.4964 | 0.933812 | Neutrophil gelatinase-associated lipocalin             | NGAL_HU<br>MAN   |
|                            | 4.28  | 0.428  | 0.913422 | Retinoic acid receptor RXR-beta                        | RXRβ_HU<br>MAN   |
|                            | 3.791 | 0.4739 | 0.910837 | Peptidyl-prolyl cis-trans isomerase FKBP1A             | FKBP1A_HU<br>MAN |
|                            | 3.342 | 0.5571 | 0.910332 | Leukocyte elastase                                     | ELNE_HU<br>MAN   |
|                            | 3.537 | 0.5896 | 0.89636  | Hepatocyte growth factor receptor                      | MET_HUM<br>AN    |
|                            | 3.373 | 0.4216 | 0.89173  | Heat shock protein HSP 90-beta                         | P08238           |
|                            | 3.971 | 0.361  | 0.861017 | Phosphatidylcholine transfer protein                   | Q9UKL6           |
|                            | 3.39  | 0.3767 | 0.844568 | Phosphatidylinositol 3-kinase regulatory subunit alpha | P85A_HUM<br>AN   |
|                            | 3.852 | 0.5503 | 0.810765 | Fatty acid-binding protein, brain                      | FABP7_HU<br>MAN  |
| <b>31-norcyclolaudenol</b> | 5.618 | 0.7022 | 2.23252  | Glucocorticoid receptor                                | GCR_HUM<br>AN    |
|                            | 4.465 | 0.893  | 2.21212  | Calmodulin                                             | CALM_HU<br>MAN   |
|                            | 4.537 | 0.7562 | 2.14343  | Oxysterols receptor LXR-beta                           | NR1H2_HU<br>MAN  |
|                            | 5.119 | 0.7313 | 2.0764   | Gastrotropin                                           | FABP6_HU<br>MAN  |
|                            | 4.63  | 0.7717 | 2.04419  | [Pyruvate dehydrogenase                                | PDK2_HU          |

|       |        |         |  |                                                            |             |
|-------|--------|---------|--|------------------------------------------------------------|-------------|
|       |        |         |  | [lipoamide]] kinase isozyme 2, mitochondrial               | MAN         |
| 4.708 | 0.7847 | 2.03251 |  | Adenosine kinase                                           | P55263      |
| 5.306 | 0.4824 | 1.93329 |  | Phosphatidylcholine transfer protein                       | Q9UKL6      |
| 4.761 | 0.6801 | 1.92861 |  | Thyroid hormone receptor alpha                             | P10827      |
| 4.157 | 0.8313 | 1.8856  |  | Bile acid receptor                                         | NR1H4_HUMAN |
| 4     | 0.8    | 1.86717 |  | Glutathione S-transferase P                                | GSTP1_HUMAN |
| 4     | 1      | 1.84271 |  | Mitogen-activated protein kinase 14                        | Q16539      |
| 4     | 0.8    | 1.78975 |  | Histone deacetylase 8                                      | Q9BY41      |
| 4.775 | 0.5968 | 1.76639 |  | Ferrochelatase, mitochondrial                              | P22830      |
| 5.211 | 0.579  | 1.74554 |  | Retinoic acid receptor beta                                | RARB_HUMAN  |
| 3.935 | 0.9838 | 1.73109 |  | Cell division protein kinase 2                             | P24941      |
| 3.878 | 0.9695 | 1.67753 |  | Peroxisome proliferator-activated receptor gamma           | PPARG_HUMAN |
| 4.505 | 0.901  | 1.62828 |  | Bile salt sulfotransferase                                 | Q06520      |
| 3.891 | 0.9728 | 1.61342 |  | Estrogen-related receptor gamma                            | P62508      |
| 4.784 | 0.6834 | 1.58479 |  | Sulfotransferase family cytosolic 2B member 1              | O00204      |
| 3.903 | 0.6505 | 1.57996 |  | Histo-blood group ABO system transferase                   | P16442      |
| 4.865 | 0.6949 | 1.56297 |  | Fatty acid-binding protein, brain                          | FABP7_HUMAN |
| 4.677 | 0.5846 | 1.55749 |  | Retinoic acid receptor gamma                               | RARG_HUMAN  |
| 4.914 | 0.6143 | 1.54784 |  | Histamine N-methyltransferase                              | P50135      |
| 3.788 | 0.9471 | 1.517   |  | Coagulation factor X                                       | FA10_HUMAN  |
| 5.296 | 0.5884 | 1.47341 |  | Dual specificity mitogen-activated protein kinase kinase 1 | MP2K1_HUMAN |
| 3.938 | 0.6563 | 1.41629 |  | Alpha-1-antitrypsin                                        | A1AT_HUMAN  |
| 3.919 | 0.6531 | 1.39644 |  | Tyrosine-protein phosphatase non-receptor type 1           | PTNI_HUMAN  |
| 5.536 | 0.692  | 1.39108 |  | Retinol-binding protein 4                                  | RET4_HUMAN  |
| 4.213 | 0.5267 | 1.3888  |  | 3-hydroxy-3-methylglutaryl-                                | HMDH_HUMAN  |

|       |        |         |                                                   |                 |
|-------|--------|---------|---------------------------------------------------|-----------------|
|       |        |         | coenzyme A reductase                              | MAN             |
| 4.365 | 0.6235 | 1.36195 | Nuclear receptor subfamily 1<br>group 1 member 2  | NR1I2_HU<br>MAN |
| 4.269 | 0.6098 | 1.34826 | Lanosterol synthase                               | ERG7_HU<br>MAN  |
| 4     | 0.8    | 1.34636 | Prothrombin                                       | THRB_HU<br>MAN  |
| 3.912 | 0.7824 | 1.29267 | Alpha-tocopherol transfer protein                 | P49638          |
| 4.249 | 0.7082 | 1.28678 | Glutathione-requiring<br>prostaglandin D synthase | PTGD2_HU<br>MAN |
| 4.073 | 0.6788 | 1.27372 | Dipeptidyl peptidase 4                            | DPP4_HUM<br>AN  |
| 4     | 0.6667 | 1.24245 | Tyrosine-protein kinase JAK3                      | JAK3_HUM<br>AN  |
| 4.05  | 0.5063 | 1.23774 | Vitamin D3 receptor                               | VDR_HUM<br>AN   |
| 3.989 | 0.6649 | 1.22777 | Nuclear receptor subfamily 1<br>group 1 member 3  | NR1I3_HU<br>MAN |
| 4.122 | 0.5152 | 1.17502 | Interleukin-2                                     | IL2_HUMA<br>N   |
| 3.935 | 0.5621 | 1.14634 | Proactivator polypeptide                          | P07602          |
| 3.907 | 0.7814 | 1.13186 | Mineralocorticoid receptor                        | MCR_HUM<br>AN   |
| 4     | 0.6667 | 1.11381 | Tyrosine-protein kinase<br>ITK/TSK                | Q08881          |
| 4.478 | 0.6397 | 1.11326 | Fatty acid-binding protein, heart                 | FABPH_HU<br>MAN |
| 3.633 | 0.7267 | 1.11229 | E3 ubiquitin-protein ligase<br>Mdm2               | MDM2_HU<br>MAN  |
| 3.949 | 0.9873 | 1.10976 | Vitamin D-binding protein                         | VTDB_HU<br>MAN  |
| 3.987 | 0.6645 | 1.10234 | cAMP-specific 3,5-cyclic<br>phosphodiesterase 4D  | PDE4D_HU<br>MAN |
| 3.576 | 0.8941 | 1.09928 | Liver carboxylesterase 1                          | EST1_HUM<br>AN  |
| 3.547 | 0.8867 | 1.08988 | Beta-secretase 1                                  | BACE1_HU<br>MAN |
| 5.008 | 0.5564 | 1.08016 | Cellular retinoic acid-binding<br>protein 2       | P29373          |
| 4.98  | 0.498  | 1.06691 | Retinoic acid receptor RXR-beta                   | RXRB_HU<br>MAN  |

|                                |       |        |          |                                                                      |             |
|--------------------------------|-------|--------|----------|----------------------------------------------------------------------|-------------|
|                                | 4     | 0.6667 | 1.05396  | Hepatocyte growth factor receptor                                    | MET_HUMAN   |
|                                | 3.573 | 0.8934 | 1.02282  | Progesterone receptor                                                | PRGR_HUMAN  |
|                                | 3.947 | 0.4934 | 1.00245  | Stromelysin-1                                                        | MMP3_HUMAN  |
|                                | 3.977 | 0.6628 | 0.997181 | Glutathione S-transferase A1                                         | P08263      |
|                                | 3.898 | 0.7796 | 0.992914 | Corticosteroid 11-beta-dehydrogenase isozyme 1                       | DH11_HUMAN  |
|                                | 3.579 | 0.7159 | 0.990347 | Aldo-keto reductase family 1 member C3                               | AK1C3_HUMAN |
|                                | 4.321 | 0.3324 | 0.954336 | Endothelial protein C receptor                                       | EPCR_HUMAN  |
|                                | 4.149 | 0.461  | 0.933011 | Mast/stem cell growth factor receptor                                | KIT_HUMAN   |
|                                | 3.965 | 0.7929 | 0.882567 | Estradiol 17-beta-dehydrogenase 1                                    | P14061      |
|                                | 3.895 | 0.5564 | 0.864838 | Tyrosine-protein kinase ZAP-70                                       | ZAP70_HUMAN |
|                                | 3.586 | 0.7172 | 0.863035 | Aldo-keto reductase family 1 member C1                               | Q04828      |
|                                | 3.769 | 0.6281 | 0.861573 | Oxysterols receptor LXR-alpha                                        | NR1H3_HUMAN |
|                                | 4.051 | 0.4501 | 0.843621 | Growth factor receptor-bound protein 2                               | GRB2_HUMAN  |
|                                | 4.201 | 0.7002 | 0.832671 | Sex hormone-binding globulin                                         | SHBG_HUMAN  |
| <b>31-norlanost-9(11)-enol</b> | 4.344 | 0.543  | 2.77699  | Heat shock protein HSP 90-beta                                       | P08238      |
|                                | 4.367 | 0.5459 | 2.31395  | Interleukin-2                                                        | IL2_HUMAN   |
|                                | 4.193 | 0.5991 | 2.19126  | Renin                                                                | RENI_HUMAN  |
|                                | 4.308 | 0.7181 | 2.18661  | [Pyruvate dehydrogenase [lipoamide]] kinase isozyme 2, mitochondrial | PDK2_HUMAN  |
|                                | 3.962 | 0.7925 | 2.16722  | Bile acid receptor                                                   | NR1H4_HUMAN |
|                                | 4.273 | 0.7122 | 2.06597  | Trafficking protein particle complex subunit 3                       | O43617      |
|                                | 3.955 | 0.7909 | 1.96263  | Prothrombin                                                          | THRB_HUMAN  |



|  |       |        |         |                                                  |             |
|--|-------|--------|---------|--------------------------------------------------|-------------|
|  | 3.702 | 0.9255 | 1.95061 | Nuclear receptor ROR-alpha                       | RORA_HUMAN  |
|  | 4.58  | 0.3523 | 1.93993 | Endothelial protein C receptor                   | EPCR_HUMAN  |
|  | 3.734 | 0.9334 | 1.89841 | Mitogen-activated protein kinase 14              | Q16539      |
|  | 4.562 | 0.6517 | 1.87993 | Sulfotransferase family cytosolic 2B member 1    | O00204      |
|  | 3.841 | 0.6401 | 1.8078  | Poly [ADP-ribose] polymerase 1                   | P09874      |
|  | 3.905 | 0.4881 | 1.77752 | 3-hydroxy-3-methylglutaryl-coenzyme A reductase  | HMDH_HUMAN  |
|  | 3.842 | 0.9606 | 1.75258 | Kinesin-like protein KIF11                       | KIF11_HUMAN |
|  | 4.223 | 0.6033 | 1.74573 | cAMP-specific 3,5-cyclic phosphodiesterase 4D    | PDE4D_HUMAN |
|  | 4.706 | 0.5229 | 1.72027 | Retinoic acid receptor beta                      | RARB_HUMAN  |
|  | 5.074 | 0.5074 | 1.71536 | Retinoic acid receptor RXR-beta                  | RXRB_HUMAN  |
|  | 3.819 | 0.6365 | 1.69508 | Oxysterols receptor LXR-beta                     | NR1H2_HUMAN |
|  | 4.065 | 0.813  | 1.69098 | SEC14-like protein 2                             | O76054      |
|  | 3.683 | 0.4603 | 1.66275 | Heme oxygenase 1                                 | HMOX1_HUMAN |
|  | 4.659 | 0.5823 | 1.66194 | Glucocorticoid receptor                          | GCR_HUMAN   |
|  | 4.09  | 0.5842 | 1.60834 | Cytochrome P450 2C8                              | CP2C8_HUMAN |
|  | 3.843 | 0.6405 | 1.59395 | Oxysterols receptor LXR-alpha                    | NR1H3_HUMAN |
|  | 3.867 | 0.9667 | 1.59271 | Vitamin D-binding protein                        | VTDB_HUMAN  |
|  | 4.574 | 0.4158 | 1.59128 | Phosphatidylcholine transfer protein             | Q9UKL6      |
|  | 3.637 | 0.7274 | 1.5738  | Steroid hormone receptor ERR1                    | P11474      |
|  | 4.142 | 0.6903 | 1.52862 | Alcohol dehydrogenase class-3                    | ADHX_HUMAN  |
|  | 3.755 | 0.6258 | 1.52528 | Peroxisome proliferator-activated receptor alpha | PPARA_HUMAN |
|  | 3.843 | 0.549  | 1.50108 | 72 kDa type IV collagenase                       | MMP2_HUMAN  |

|  |       |        |         |                                                                  |             |
|--|-------|--------|---------|------------------------------------------------------------------|-------------|
|  | 3.841 | 0.7683 | 1.49932 | Wiskott-Aldrich syndrome protein                                 | WASP_HUMAN  |
|  | 3.816 | 0.636  | 1.47857 | Nuclear receptor subfamily 1 group I member 3                    | NR1I3_HUMAN |
|  | 3.922 | 0.6537 | 1.46303 | Glutathione S-transferase A1                                     | P08263      |
|  | 3.702 | 0.617  | 1.45824 | Flavin reductase                                                 | P30043      |
|  | 4.158 | 0.5198 | 1.44507 | Ferrochelatase, mitochondrial                                    | P22830      |
|  | 3.881 | 0.5545 | 1.38931 | Retinoic acid receptor gamma                                     | RARG_HUMAN  |
|  | 3.578 | 0.7155 | 1.38241 | cAMP-dependent protein kinase catalytic subunit alpha            | P00517      |
|  | 3.728 | 0.7457 | 1.35158 | Calmodulin                                                       | CALM_HUMAN  |
|  | 4.061 | 0.5801 | 1.31863 | Hepatocyte nuclear factor 4-gamma                                | Q14541      |
|  | 3.851 | 0.6418 | 1.30538 | Tyrosine-protein kinase SYK                                      | KSYK_HUMAN  |
|  | 3.802 | 0.4752 | 1.26494 | Stromelysin-1                                                    | MMP3_HUMAN  |
|  | 3.463 | 0.6926 | 1.21533 | Glutathione S-transferase P                                      | GSTP1_HUMAN |
|  | 3.87  | 0.645  | 1.17636 | Adenosine kinase                                                 | P55263      |
|  | 4.538 | 0.5042 | 1.15511 | Dual specificity mitogen-activated protein kinase kinase 1       | MP2K1_HUMAN |
|  | 3.881 | 0.7762 | 1.14352 | Bile salt sulfotransferase                                       | Q06520      |
|  | 3.666 | 0.611  | 1.1422  | Tyrosine-protein kinase JAK3                                     | JAK3_HUMAN  |
|  | 3.695 | 0.4619 | 1.12389 | Vitamin D3 receptor                                              | VDR_HUMAN   |
|  | 4.033 | 0.5762 | 1.10923 | Gastrotropin                                                     | FABP6_HUMAN |
|  | 3.588 | 0.5125 | 1.10824 | Protein S100-A9                                                  | S10A9_HUMAN |
|  | 3.51  | 0.5851 | 1.10582 | Alpha-1-antitrypsin                                              | A1AT_HUMAN  |
|  | 3.442 | 0.6884 | 1.09218 | Histone deacetylase 8                                            | Q9BY41      |
|  | 3.842 | 0.4269 | 1.07013 | Serine/threonine-protein phosphatase PP1-gamma catalytic subunit | P36873      |
|  | 3.862 | 0.4291 | 1.0562  | Growth factor receptor-bound protein 2                           | GRB2_HUMAN  |

|                         |       |        |          |                                                      |              |
|-------------------------|-------|--------|----------|------------------------------------------------------|--------------|
|                         | 3.377 | 0.6755 | 1.04121  | E3 ubiquitin-protein ligase<br>Mdm2                  | MDM2_HUMAN   |
|                         | 4.057 | 0.4508 | 1.03348  | Angiotensin-1 receptor                               | TIE2_HUMAN   |
|                         | 3.631 | 0.6051 | 1.02865  | Retinol-binding protein 4                            | RET4_HUMAN   |
|                         | 3.735 | 0.4668 | 1.01849  | Proto-oncogene tyrosine-protein<br>kinase ABL1       | P00519       |
|                         | 3.492 | 0.6984 | 0.978512 | Alpha-tocopherol transfer protein                    | P49638       |
|                         | 3.717 | 0.7433 | 0.947652 | Estradiol 17-beta-dehydrogenase<br>1                 | P14061       |
|                         | 3.923 | 0.5604 | 0.946604 | Mitogen-activated protein kinase<br>10               | MK10_HUMAN   |
|                         | 3.623 | 0.5176 | 0.864196 | Tyrosine-protein kinase ZAP-70                       | ZAP70_HUMAN  |
|                         | 5.499 | 0.5499 | 0.863123 | Cellular retinoic acid-binding<br>protein 2          | P29373       |
|                         | 3.595 | 0.5991 | 0.858888 | Tyrosine-protein kinase<br>ITK/TSK                   | Q08881       |
|                         | 3.564 | 0.7129 | 0.857779 | Corticosteroid 11-beta-<br>dehydrogenase isozyme 1   | DH11_HUMAN   |
|                         | 3.524 | 0.7048 | 0.849626 | Tyrosine-protein phosphatase<br>non-receptor type 11 | PTN11_HUMAN  |
|                         | 3.67  | 0.5242 | 0.842425 | Protein kinase C theta type                          | KPCT_HUMAN   |
|                         | 3.486 | 0.498  | 0.823198 | Basic fibroblast growth factor<br>receptor 1         | FGFR1_HUMAN  |
|                         | 3.841 | 0.4801 | 0.819841 | Peptidyl-prolyl cis-trans<br>isomerase FKBP1A        | FKBP1A_HUMAN |
|                         | 3.302 | 0.5504 | 0.819361 | Ganglioside GM2 activator                            | P17900       |
|                         | 3.716 | 0.5309 | 0.804874 | Nuclear receptor subfamily 1<br>group I member 2     | NR1I2_HUMAN  |
| <b>31-norlanosterol</b> | 5.061 | 0.723  | 3.17901  | Lanosterol synthase                                  | ERG7_HUMAN   |
|                         | 4.514 | 0.5643 | 2.52853  | Vitamin D3 receptor                                  | VDR_HUMAN    |
|                         | 4.587 | 0.7645 | 2.45819  | Trafficking protein particle<br>complex subunit 3    | O43617       |
|                         | 4.966 | 0.382  | 2.36835  | Endothelial protein C receptor                       | EPCR_HUMAN   |
|                         | 5.636 | 0.6263 | 2.31898  | Dual specificity mitogen-                            | MP2K1_HUMAN  |

|       |        |         |                                                       |             |
|-------|--------|---------|-------------------------------------------------------|-------------|
|       |        |         | activated protein kinase kinase 1                     | MAN         |
| 3.971 | 0.9927 | 2.29424 | Progesterone receptor                                 | PRGR_HUMAN  |
| 3.946 | 0.7893 | 2.08373 | cAMP-dependent protein kinase catalytic subunit alpha | P00517      |
| 4.346 | 0.8691 | 2.04844 | SEC14-like protein 2                                  | O76054      |
| 3.925 | 0.7851 | 1.95641 | Mineralocorticoid receptor                            | MCR_HUMAN   |
| 4.374 | 0.6248 | 1.95547 | Cytochrome P450 2C8                                   | CP2C8_HUMAN |
| 4     | 0.6667 | 1.91565 | Peroxisome proliferator-activated receptor alpha      | PPARA_HUMAN |
| 5.503 | 0.6879 | 1.77204 | Retinol-binding protein 4                             | RET4_HUMAN  |
| 4.466 | 0.638  | 1.76464 | Estrogen sulfotransferase                             | ST1E1_HUMAN |
| 3.825 | 0.765  | 1.67803 | Bile acid receptor                                    | NR1H4_HUMAN |
| 4.783 | 0.5314 | 1.66578 | Retinoic acid receptor beta                           | RARB_HUMAN  |
| 3.646 | 0.9114 | 1.64699 | Nuclear receptor ROR-alpha                            | RORA_HUMAN  |
| 3.789 | 0.7577 | 1.63443 | Vascular endothelial growth factor receptor 2         | P35968      |
| 3.868 | 0.4835 | 1.59848 | Heat shock protein HSP 90-beta                        | P08238      |
| 4.394 | 0.5492 | 1.58726 | Retinoic acid receptor gamma                          | RARG_HUMAN  |
| 3.911 | 0.6519 | 1.57891 | Oxysterols receptor LXR-alpha                         | NR1H3_HUMAN |
| 4.198 | 0.4665 | 1.54284 | Growth factor receptor-bound protein 2                | GRB2_HUMAN  |
| 3.806 | 0.6344 | 1.54217 | Flavin reductase                                      | P30043      |
| 3.677 | 0.7353 | 1.53664 | Histone deacetylase 8                                 | Q9BY41      |
| 3.82  | 0.764  | 1.53468 | Alpha-tocopherol transfer protein                     | P49638      |
| 3.612 | 0.7223 | 1.44806 | Glutathione S-transferase P                           | GSTP1_HUMAN |
| 4.21  | 0.5263 | 1.42249 | Retinoic acid receptor alpha                          | RARA_HUMAN  |
| 4.081 | 0.5102 | 1.37379 | Caspase-3                                             | CASP3_HUMAN |
| 3.605 | 0.721  | 1.37295 | Steroid hormone receptor ERR1                         | P11474      |

|  |       |        |          |                                                           |                 |
|--|-------|--------|----------|-----------------------------------------------------------|-----------------|
|  | 4.199 | 0.5249 | 1.36943  | Ferrochelatase, mitochondrial                             | P22830          |
|  | 4.867 | 0.4867 | 1.32447  | Retinoic acid receptor RXR-beta                           | RXRB_HU<br>MAN  |
|  | 3.806 | 0.5437 | 1.30348  | 72 kDa type IV collagenase                                | MMP2_HU<br>MAN  |
|  | 3.814 | 0.9536 | 1.29334  | Vitamin D-binding protein                                 | VTDB_HU<br>MAN  |
|  | 3.818 | 0.7635 | 1.28989  | Wiskott-Aldrich syndrome<br>protein                       | WASP_HU<br>MAN  |
|  | 6.292 | 0.6292 | 1.28147  | Cellular retinoic acid-binding<br>protein 2               | P29373          |
|  | 3.987 | 0.6645 | 1.26769  | Glutathione-requiring<br>prostaglandin D synthase         | PTGD2_HU<br>MAN |
|  | 3.53  | 0.8825 | 1.26298  | Mitogen-activated protein kinase<br>14                    | Q16539          |
|  | 4.208 | 0.6012 | 1.24486  | Gastrotropin                                              | FABP6_HU<br>MAN |
|  | 4.429 | 0.4027 | 1.22736  | Phosphatidylcholine transfer<br>protein                   | Q9UKL6          |
|  | 3.796 | 0.7592 | 1.21358  | Corticosteroid 11-beta-<br>dehydrogenase isozyme 1        | DHI1_HUM<br>AN  |
|  | 3.702 | 0.4113 | 1.20345  | Phosphatidylinositol 3-kinase<br>regulatory subunit alpha | P85A_HUM<br>AN  |
|  | 3.852 | 0.6421 | 1.19787  | Hepatocyte growth factor<br>receptor                      | MET_HUM<br>AN   |
|  | 3.632 | 0.6053 | 1.18942  | Poly [ADP-ribose] polymerase 1                            | P09874          |
|  | 3.907 | 0.7814 | 1.16177  | Estradiol 17-beta-dehydrogenase<br>1                      | P14061          |
|  | 3.824 | 0.6373 | 1.12181  | Glutathione S-transferase A1                              | P08263          |
|  | 4     | 0.6667 | 1.11692  | Alcohol dehydrogenase class-3                             | ADHX_HU<br>MAN  |
|  | 3.816 | 0.6361 | 1.0927   | Tyrosine-protein kinase SYK                               | KSYK_HU<br>MAN  |
|  | 3.609 | 0.6015 | 1.09195  | Tyrosine-protein phosphatase<br>non-receptor type 1       | PTN1_HU<br>MAN  |
|  | 3.667 | 0.7334 | 1.03442  | Tyrosine-protein phosphatase<br>non-receptor type 11      | PTN11_HU<br>MAN |
|  | 3.607 | 0.5153 | 1.01232  | Protein S100-A9                                           | S10A9_HU<br>MAN |
|  | 3.671 | 0.5244 | 0.980914 | Interleukin-2                                             | IL2_HUMA<br>N   |

|                 |       |        |          |                                                                  |             |
|-----------------|-------|--------|----------|------------------------------------------------------------------|-------------|
|                 | 3.624 | 0.7248 | 0.970122 | Calmodulin                                                       | CALM_HUMAN  |
|                 | 3.849 | 0.4277 | 0.941614 | Serine/threonine-protein phosphatase PP1-gamma catalytic subunit | P36873      |
|                 | 4.162 | 0.5203 | 0.940518 | Histamine N-methyltransferase                                    | P50135      |
|                 | 3.836 | 0.7672 | 0.920744 | Bile salt sulfotransferase                                       | Q06520      |
|                 | 4.051 | 0.4502 | 0.902438 | Angiopoietin-1 receptor                                          | TIE2_HUMAN  |
|                 | 3.888 | 0.5555 | 0.881143 | Hepatocyte nuclear factor 4-gamma                                | Q14541      |
|                 | 3.959 | 0.5655 | 0.85066  | Sulfotransferase family cytosolic 2B member 1                    | O00204      |
|                 | 3.773 | 0.6288 | 0.850271 | Adenosine kinase                                                 | P55263      |
|                 | 3.421 | 0.6842 | 0.841032 | Serine/threonine-protein kinase Chk1                             | CHK1_HUMAN  |
|                 | 3.767 | 0.4186 | 0.828254 | Cathepsin B                                                      | CATB_HUMAN  |
|                 | 3.422 | 0.5703 | 0.81609  | Alpha-1-antitrypsin                                              | A1AT_HUMAN  |
| <b>Atropine</b> | 3.556 | 0.4445 | 4.51205  | Eukaryotic translation initiation factor 4E                      | P06730      |
|                 | 3.354 | 0.4791 | 3.8744   | Dihydrofolate reductase                                          | DYR_HUMAN   |
|                 | 3.687 | 0.6146 | 2.37246  | Phosphoenolpyruvate carboxykinase, cytosolic [GTP]               | P35558      |
|                 | 3.448 | 0.3831 | 2.0066   | 5(3)-deoxyribonucleotidase, mitochondrial                        | Q9NPB1      |
|                 | 2.966 | 0.7414 | 1.9018   | Cathepsin B                                                      | CATB_HUMAN  |
|                 | 2.914 | 0.7284 | 1.77799  | Galectin-7                                                       | LEG7_HUMAN  |
|                 | 2.933 | 0.9777 | 1.77356  | Peptidyl-prolyl cis-trans isomerase A                            | P62937      |
|                 | 2.941 | 0.7353 | 1.76386  | Carnitine O-acetyltransferase                                    | CACP_HUMAN  |
|                 | 2.952 | 0.2684 | 1.65668  | Histone-lysine N-methyltransferase SETD8                         | SETD8_HUMAN |
|                 | 2.98  | 0.7449 | 1.63124  | Proto-oncogene tyrosine-protein kinase Src                       | SRC_HUMAN   |
|                 | 2.916 | 0.7291 | 1.60151  | Ig lambda chain V-II region                                      | P01709      |

|       |        |         |                                                                      |             |
|-------|--------|---------|----------------------------------------------------------------------|-------------|
|       |        |         | MGC                                                                  |             |
| 2.921 | 0.7302 | 1.59683 | Cell division protein kinase 2                                       | P24941      |
| 2.907 | 0.7269 | 1.55304 | Stromelysin-1                                                        | MMP3_HUMAN  |
| 2.868 | 0.717  | 1.55122 | Aldose reductase                                                     | ALDR_HUMAN  |
| 3.876 | 0.3876 | 1.52787 | Sulfotransferase family cytosolic 2B member 1                        | O00204      |
| 2.907 | 0.9691 | 1.52206 | Oxysterols receptor LXR-beta                                         | NR1H2_HUMAN |
| 2.899 | 0.3624 | 1.35829 | Dipeptidyl peptidase 4                                               | DPP4_HUMAN  |
| 2.873 | 0.7181 | 1.34996 | Prothrombin                                                          | THRB_HUMAN  |
| 2.954 | 0.3693 | 1.32569 | Signal transducer and activator of transcription 1-alpha/beta        | STAT1_HUMAN |
| 2.841 | 0.7101 | 1.31656 | Coagulation factor X                                                 | FA10_HUMAN  |
| 3.824 | 0.3824 | 1.27547 | Neprilysin                                                           | NEP_HUMAN   |
| 2.84  | 0.5681 | 1.26701 | Urokinase-type plasminogen activator                                 | UROK_HUMAN  |
| 2.987 | 0.3733 | 1.2636  | Coagulation factor XI                                                | FA11_HUMAN  |
| 2.956 | 0.4223 | 1.26258 | cAMP-dependent protein kinase, alpha-catalytic subunit               | P00517      |
| 2.902 | 0.4146 | 1.22077 | Endoplasmic reticulum mannosyl-oligosaccharide 1,2-alpha-mannosidase | Q9UKM7      |
| 2.949 | 0.3277 | 1.18953 | Histone acetyltransferase PCAF                                       | Q92831      |
| 2.933 | 0.419  | 1.18716 | Renin                                                                | RENI_HUMAN  |
| 2.934 | 0.4191 | 1.17317 | Spermidine synthase                                                  | P19623      |
| 2.823 | 0.5646 | 1.16432 | Cathepsin K                                                          | CATK_HUMAN  |
| 2.95  | 0.59   | 1.13826 | Tyrosine-protein phosphatase non-receptor type 1                     | PTN1_HUMAN  |
| 2.903 | 0.7258 | 1.11879 | Serum amyloid P-component                                            | P02743      |
| 2.84  | 0.5681 | 1.06841 | Superoxide dismutase [Mn], mitochondrial                             | P04179      |
| 2.943 | 0.5886 | 1.03777 | Ornithine carbamoyltransferase,                                      | P00480      |

|                    |       |        |          |                                                                            |             |
|--------------------|-------|--------|----------|----------------------------------------------------------------------------|-------------|
|                    |       |        |          | mitochondrial                                                              |             |
|                    | 2.847 | 0.5694 | 1.03476  | Macrophage metalloelastase                                                 | MMP12_HUMAN |
|                    | 2.76  | 0.69   | 1.03022  | Carbonic anhydrase 2                                                       | CAH2_HUMAN  |
|                    | 2.913 | 0.4855 | 1.02053  | Dihydroorotate dehydrogenase, mitochondrial                                | PYRD_HUMAN  |
|                    | 2.775 | 0.6938 | 1.01103  | Complement factor D                                                        | CFAD_HUMAN  |
|                    | 2.785 | 0.4642 | 1.00429  | Fatty acid-binding protein, adipocyte                                      | FABP4_HUMAN |
|                    | 2.849 | 0.4748 | 0.983223 | Peroxisome proliferator-activated receptor gamma                           | PPARG_HUMAN |
|                    | 2.838 | 0.4054 | 0.962224 | Arginase-2, mitochondrial                                                  | ARGI2_HUMAN |
|                    | 2.884 | 0.3204 | 0.940296 | Pancreatic alpha-amylase                                                   | AMYP_HUMAN  |
|                    | 3.178 | 0.3178 | 0.93682  | ADAM 33                                                                    | ADA33_HUMAN |
|                    | 2.718 | 0.9062 | 0.910828 | Cholinesterase                                                             | CHLE_HUMAN  |
|                    | 2.741 | 0.4569 | 0.907249 | Glycogen synthase kinase-3 beta                                            | GSK3B_HUMAN |
|                    | 2.839 | 0.3549 | 0.873073 | Beta-secretase 1                                                           | P56817      |
|                    | 2.945 | 0.3682 | 0.870922 | Betaine--homocysteine S-methyltransferase 1                                | Q93088      |
|                    | 2.758 | 0.6896 | 0.869062 | Protein farnesyltransferase/geranylgeranyltransferase type-1 subunit alpha | FNTA_HUMAN  |
|                    | 2.848 | 0.4747 | 0.864099 | Eosinophil cationic protein                                                | P12724      |
|                    | 2.825 | 0.4709 | 0.85758  | Thymidylate synthase                                                       | TYSY_HUMAN  |
|                    | 2.982 | 0.3728 | 0.85732  | ADP-ribosylation factor 4                                                  | P18085      |
|                    | 2.719 | 0.6797 | 0.825916 | Casein kinase I isoform gamma-2                                            | KC1G2_HUMAN |
| <b>campesterol</b> | 4.633 | 0.9266 | 2.66174  | Estradiol 17-beta-dehydrogenase 1                                          | P14061      |
|                    | 3.929 | 0.9823 | 2.55778  | Nuclear receptor ROR-alpha                                                 | RORA_HUMAN  |
|                    | 4.543 | 0.5048 | 2.41179  | Growth factor receptor-bound protein 2                                     | GRB2_HUMAN  |



|  |       |        |         |                                                |             |
|--|-------|--------|---------|------------------------------------------------|-------------|
|  | 4.393 | 0.8787 | 2.33989 | SEC14-like protein 2                           | O76054      |
|  | 3.822 | 0.9556 | 2.12912 | Progesterone receptor                          | PRGR_HUMAN  |
|  | 3.935 | 0.7869 | 2.1248  | Bile acid receptor                             | NR1H4_HUMAN |
|  | 3.783 | 0.9458 | 2.04746 | Mineralocorticoid receptor                     | MCR_HUMAN   |
|  | 4.318 | 0.7197 | 2.00872 | Glutathione-requiring prostaglandin D synthase | PTGD2_HUMAN |
|  | 3.753 | 0.7506 | 1.92168 | Histone deacetylase 8                          | Q9BY41      |
|  | 4.227 | 0.6039 | 1.89956 | Lanosterol synthase                            | ERG7_HUMAN  |
|  | 3.941 | 0.6568 | 1.83502 | Oxysterols receptor LXR-alpha                  | NR1H3_HUMAN |
|  | 3.86  | 0.965  | 1.81437 | Kinesin-like protein KIF11                     | KIF11_HUMAN |
|  | 4.127 | 0.6878 | 1.8063  | Trafficking protein particle complex subunit 3 | O43617      |
|  | 4.488 | 0.6412 | 1.78123 | Sulfotransferase family cytosolic 2B member 1  | O00204      |
|  | 4.283 | 0.5354 | 1.71945 | Retinoic acid receptor alpha                   | RARA_HUMAN  |
|  | 3.832 | 0.7665 | 1.6746  | Prothrombin                                    | THRB_HUMAN  |
|  | 4.446 | 0.7409 | 1.66715 | Sex hormone-binding globulin                   | SHBG_HUMAN  |
|  | 4.119 | 0.5149 | 1.62447 | Caspase-3                                      | CASP3_HUMAN |
|  | 3.851 | 0.9628 | 1.57575 | Vitamin D-binding protein                      | VTDB_HUMAN  |
|  | 3.745 | 0.7489 | 1.57474 | Androgen receptor                              | ANDR_HUMAN  |
|  | 5.126 | 0.6407 | 1.53916 | Retinol-binding protein 4                      | RET4_HUMAN  |
|  | 3.861 | 0.7722 | 1.52653 | Corticosteroid 11-beta-dehydrogenase isozyme 1 | DHI1_HUMAN  |
|  | 3.603 | 0.7206 | 1.51953 | Steroid hormone receptor ERR1                  | P11474      |
|  | 4.239 | 0.5299 | 1.51044 | Retinoic acid receptor gamma                   | RARG_HUMAN  |
|  | 4.166 | 0.5208 | 1.47204 | Ferrochelatase, mitochondrial                  | P22830      |
|  | 4.754 | 0.5282 | 1.43304 | Dual specificity mitogen-                      | MP2K1_HU    |

|       |        |         |                                                        |             |
|-------|--------|---------|--------------------------------------------------------|-------------|
|       |        |         | activated protein kinase kinase 1                      | MAN         |
| 4.091 | 0.5844 | 1.38773 | Hepatocyte nuclear factor 4-gamma                      | Q14541      |
| 3.936 | 0.5623 | 1.3395  | Cytochrome P450 2C8                                    | CP2C8_HUMAN |
| 4.135 | 0.5907 | 1.31887 | Mitogen-activated protein kinase 10                    | MK10_HUMAN  |
| 3.5   | 0.5834 | 1.31697 | Ganglioside GM2 activator                              | P17900      |
| 3.922 | 0.6536 | 1.29686 | Adenosine kinase                                       | P55263      |
| 4.156 | 0.3197 | 1.25843 | Endothelial protein C receptor                         | EPCR_HUMAN  |
| 3.455 | 0.8639 | 1.23811 | Collagenase 3                                          | MMP13_HUMAN |
| 3.637 | 0.4041 | 1.22405 | Phosphatidylinositol 3-kinase regulatory subunit alpha | P85A_HUMAN  |
| 3.675 | 0.735  | 1.21955 | Tyrosine-protein phosphatase non-receptor type 11      | PTN11_HUMAN |
| 3.661 | 0.7322 | 1.2177  | Calmodulin                                             | CALM_HUMAN  |
| 3.703 | 0.7405 | 1.20975 | Wiskott-Aldrich syndrome protein                       | WASP_HUMAN  |
| 3.792 | 0.474  | 1.2056  | 3-hydroxy-3-methylglutaryl-coenzyme A reductase        | HMDH_HUMAN  |
| 3.777 | 0.6295 | 1.18777 | Glutathione S-transferase A1                           | P08263      |
| 4.059 | 0.5798 | 1.16426 | Gastrotropin                                           | FABP6_HUMAN |
| 3.475 | 0.695  | 1.15679 | cAMP-dependent protein kinase catalytic subunit alpha  | P00517      |
| 3.447 | 0.6894 | 1.14067 | Dipeptidyl peptidase 4                                 | DPP4_HUMAN  |
| 3.629 | 0.5184 | 1.12152 | 72 kDa type IV collagenase                             | MMP2_HUMAN  |
| 3.673 | 0.6122 | 1.12101 | Oxysterols receptor LXR-beta                           | NR1H2_HUMAN |
| 3.574 | 0.5956 | 1.10785 | Receptor tyrosine-protein kinase erbB-4                | ERBB4_HUMAN |
| 3.739 | 0.6231 | 1.09717 | Tyrosine-protein kinase SYK                            | KSYK_HUMAN  |
| 3.517 | 0.5862 | 1.08765 | Poly [ADP-ribose] polymerase 1                         | P09874      |
| 3.686 | 0.6144 | 1.05711 | Proto-oncogene tyrosine-protein kinase LCK             | LCK_HUMAN   |

|                     |       |        |          |                                                     |             |
|---------------------|-------|--------|----------|-----------------------------------------------------|-------------|
|                     | 4.103 | 0.5861 | 1.0507   | Fatty acid-binding protein, brain                   | FABP7_HUMAN |
|                     | 3.525 | 0.5876 | 1.04797  | Flavin reductase                                    | P30043      |
|                     | 3.302 | 0.8255 | 1.03947  | Bile salt sulfotransferase                          | Q06520      |
|                     | 3.547 | 0.5067 | 1.034    | Protein S100-A9                                     | S10A9_HUMAN |
|                     | 3.664 | 0.6107 | 1.03027  | Tyrosine-protein kinase<br>ITK/TSK                  | Q08881      |
|                     | 3.863 | 0.6439 | 1.02551  | Alcohol dehydrogenase class-3                       | ADHX_HUMAN  |
|                     | 3.727 | 0.4659 | 1.02042  | Proto-oncogene tyrosine-protein<br>kinase ABL1      | P00519      |
|                     | 3.667 | 0.5238 | 0.967487 | Tyrosine-protein kinase ZAP-70                      | ZAP70_HUMAN |
|                     | 3.342 | 0.8355 | 0.964636 | Mitogen-activated protein kinase<br>14              | Q16539      |
|                     | 3.568 | 0.5946 | 0.944967 | Tyrosine-protein kinase JAK3                        | JAK3_HUMAN  |
|                     | 3.808 | 0.4231 | 0.902243 | Mast/stem cell growth factor<br>receptor            | KIT_HUMAN   |
|                     | 5.544 | 0.5544 | 0.900073 | Cellular retinoic acid-binding<br>protein 2         | P29373      |
|                     | 3.539 | 0.5898 | 0.889477 | Nuclear receptor subfamily 1<br>group I member 3    | NR1I3_HUMAN |
|                     | 3.535 | 0.5891 | 0.880579 | Ephrin type-B receptor 4                            | EPHB4_HUMAN |
|                     | 3.542 | 0.506  | 0.870491 | Interleukin-2                                       | IL2_HUMAN   |
|                     | 3.436 | 0.4295 | 0.846212 | Heat shock protein HSP 90-beta                      | P08238      |
|                     | 3.438 | 0.5731 | 0.801752 | Peroxisome proliferator-activated<br>receptor alpha | PPARA_HUMAN |
| <b>Cycloartenol</b> | 3.484 | 0.5807 | 2.5178   | Nuclear receptor subfamily 1<br>group I member 3    | NR1I3_HUMAN |
|                     | 3.63  | 0.4537 | 2.33584  | Caspase-3                                           | CASP3_HUMAN |
|                     | 3.474 | 0.4963 | 2.30011  | 72 kDa type IV collagenase                          | MMP2_HUMAN  |
|                     | 3.807 | 0.2928 | 2.21527  | Endothelial protein C receptor                      | EPCR_HUMAN  |
|                     | 3.575 | 0.3972 | 2.14867  | Growth factor receptor-bound<br>protein 2           | GRB2_HUMAN  |

|       |        |         |                                                                      |             |
|-------|--------|---------|----------------------------------------------------------------------|-------------|
| 3.402 | 0.567  | 1.87454 | Trafficking protein particle complex subunit 3                       | O43617      |
| 3.451 | 0.3834 | 1.86372 | Serine/threonine-protein phosphatase PP1-gamma catalytic subunit     | P36873      |
| 3.519 | 0.5027 | 1.81061 | Hepatocyte nuclear factor 4-gamma                                    | Q14541      |
| 3.35  | 0.5584 | 1.80509 | Tyrosine-protein kinase SYK                                          | KSYK_HUMAN  |
| 3.261 | 0.5436 | 1.78231 | Tyrosine-protein phosphatase non-receptor type 1                     | PTN1_HUMAN  |
| 2.959 | 0.9863 | 1.70913 | Steryl-sulfatase                                                     | STS_HUMAN   |
| 2.944 | 0.9812 | 1.64268 | Apolipoprotein A-II                                                  | APOA2_HUMAN |
| 3.306 | 0.5509 | 1.63063 | [Pyruvate dehydrogenase [lipoamide]] kinase isozyme 2, mitochondrial | PDK2_HUMAN  |
| 3.934 | 0.3934 | 1.62687 | Nuclear receptor subfamily 1 group 1 member 2                        | NR1I2_HUMAN |
| 3.531 | 0.5045 | 1.61676 | Gastrotropin                                                         | FABP6_HUMAN |
| 2.994 | 0.5989 | 1.554   | Glutathione S-transferase P                                          | GSTP1_HUMAN |
| 2.975 | 0.595  | 1.5448  | Epidermal growth factor receptor                                     | EGFR_HUMAN  |
| 3.256 | 0.6513 | 1.49716 | SEC14-like protein 2                                                 | O76054      |
| 2.987 | 0.4978 | 1.46066 | Histo-blood group ABO system transferase                             | P16442      |
| 3.167 | 0.5278 | 1.45933 | Integrin alpha-L                                                     | ITAL_HUMAN  |
| 2.851 | 0.9502 | 1.457   | Transthyretin                                                        | TTHY_HUMAN  |
| 2.918 | 0.5836 | 1.43716 | Renin                                                                | RENI_HUMAN  |
| 2.995 | 0.4992 | 1.39549 | Insulin-like growth factor IA                                        | P01343      |
| 3.405 | 0.4256 | 1.39364 | Phospholipase A2, membrane associated                                | P14555      |
| 2.877 | 0.9591 | 1.39119 | Amine oxidase [flavin-containing] B                                  | AOFB_HUMAN  |
| 3.534 | 0.4417 | 1.37165 | Histamine N-methyltransferase                                        | P50135      |

|  |       |        |          |                                                            |             |
|--|-------|--------|----------|------------------------------------------------------------|-------------|
|  | 2.85  | 0.9499 | 1.35567  | Serum albumin                                              | ALBU_HUMAN  |
|  | 3.566 | 0.4457 | 1.30484  | Glucocorticoid receptor                                    | GCR_HUMAN   |
|  | 2.909 | 0.7273 | 1.30375  | Cell division protein kinase 2                             | P24941      |
|  | 2.878 | 0.7195 | 1.2254   | Mitogen-activated protein kinase 8                         | MK08_HUMAN  |
|  | 3.329 | 0.4756 | 1.19123  | Mitogen-activated protein kinase 10                        | MK10_HUMAN  |
|  | 3.567 | 0.4458 | 1.18939  | Retinoic acid receptor RXR-alpha                           | RXRA_HUMAN  |
|  | 2.847 | 0.5693 | 1.09764  | Androgen receptor                                          | ANDR_HUMAN  |
|  | 2.766 | 0.9221 | 1.0919   | Prothrombin                                                | THRB_HUMAN  |
|  | 2.907 | 0.5813 | 1.07097  | Proto-oncogene tyrosine-protein kinase Src                 | SRC_HUMAN   |
|  | 3.59  | 0.3989 | 1.03292  | Dual specificity mitogen-activated protein kinase kinase 1 | MP2K1_HUMAN |
|  | 2.922 | 0.487  | 1.00399  | Poly [ADP-ribose] polymerase 1                             | P09874      |
|  | 2.973 | 0.5947 | 0.967932 | Calmodulin                                                 | CALM_HUMAN  |
|  | 2.926 | 0.3658 | 0.953792 | Heat shock protein HSP 90-beta                             | P08238      |
|  | 2.962 | 0.5925 | 0.90149  | Tyrosine-protein phosphatase non-receptor type 11          | PTN11_HUMAN |
|  | 2.784 | 0.6959 | 0.899418 | Nuclear receptor ROR-alpha                                 | RORA_HUMAN  |
|  | 2.706 | 0.9018 | 0.890307 | Kinesin-like protein KIF11                                 | KIF11_HUMAN |
|  | 2.704 | 0.5409 | 0.858343 | Stromelysin-1                                              | MMP3_HUMAN  |
|  | 3.246 | 0.4637 | 0.845893 | Fatty acid-binding protein, heart                          | FABPH_HUMAN |
|  | 2.894 | 0.4824 | 0.841731 | Flavin reductase                                           | P30043      |
|  | 2.897 | 0.4829 | 0.832013 | NAD(P)H dehydrogenase [quinone] 1                          | NQO1_HUMAN  |
|  | 2.865 | 0.5731 | 0.827054 | Serine/threonine-protein kinase Chk1                       | CHK1_HUMAN  |
|  | 2.904 | 0.4149 | 0.803339 | 3-phosphoinositide-dependent protein kinase 1              | PDPK1_HUMAN |
|  | 2.892 | 0.4819 | 0.801156 | Peroxisome proliferator-activated                          | PPARA_HUMAN |

|                       |       |        |          |                                                                            |              |
|-----------------------|-------|--------|----------|----------------------------------------------------------------------------|--------------|
|                       |       |        |          | receptor alpha                                                             | MAN          |
|                       | 2.944 | 0.4206 | 0.800629 | Mitogen-activated protein kinase 1                                         | MK01_HUMAN   |
| <b>Cycloeucalenol</b> | 3.806 | 0.4757 | 2.79645  | Caspase-3                                                                  | CASP3_HUMAN  |
|                       | 3.845 | 0.5493 | 2.60713  | Hepatocyte nuclear factor 4-gamma                                          | Q14541       |
|                       | 3.414 | 0.8534 | 2.41308  | Vitamin D-binding protein                                                  | VTDB_HUMAN   |
|                       | 3.423 | 0.4891 | 2.28964  | Protein farnesyltransferase/geranylgeranyltransferase type-1 subunit alpha | FNTA_HUMAN   |
|                       | 3.873 | 0.5533 | 2.18227  | Fatty acid-binding protein, brain                                          | FABP7_HUMAN  |
|                       | 3.727 | 0.5324 | 2.04541  | Gastrotropin                                                               | FABP6_HUMAN  |
|                       | 2.961 | 0.9871 | 1.8733   | Integrin alpha-L                                                           | ITAL_HUMAN   |
|                       | 3.221 | 0.6442 | 1.84893  | Calmodulin                                                                 | CALM_HUMAN   |
|                       | 3.154 | 0.3942 | 1.72109  | Heat shock protein HSP 90-beta                                             | P08238       |
|                       | 2.998 | 0.5996 | 1.68401  | Glutathione S-transferase P                                                | GSTP1_HUMAN  |
|                       | 2.932 | 0.7331 | 1.67713  | Phenylethanolamine N-methyltransferase                                     | PNMT_HUMAN   |
|                       | 3.563 | 0.4453 | 1.65674  | Heat shock protein HSP 90-alpha                                            | HS90A_HUMAN  |
|                       | 3.564 | 0.2742 | 1.65603  | Endothelial protein C receptor                                             | EPCR_HUMAN   |
|                       | 2.843 | 0.9478 | 1.63792  | Peptidyl-prolyl cis-trans isomerase FKBP1A                                 | FKBP1A_HUMAN |
|                       | 3.652 | 0.4565 | 1.62422  | Histamine N-methyltransferase                                              | P50135       |
|                       | 3.164 | 0.5273 | 1.58851  | Nuclear receptor subfamily 1 group I member 3                              | NR1I3_HUMAN  |
|                       | 2.927 | 0.7317 | 1.58821  | Troponin C, slow skeletal and cardiac muscles                              | P63316       |
|                       | 2.862 | 0.954  | 1.58807  | Caspase-7                                                                  | CASP7_HUMAN  |
|                       | 2.974 | 0.4957 | 1.52767  | Histo-blood group ABO system transferase                                   | P16442       |
|                       | 3.141 | 0.4488 | 1.48603  | 72 kDa type IV collagenase                                                 | MMP2_HUMAN   |

|       |        |          |                                                                  |             |
|-------|--------|----------|------------------------------------------------------------------|-------------|
|       |        |          |                                                                  | MAN         |
| 3.504 | 0.438  | 1.47662  | Retinoic acid receptor RXR-alpha                                 | RXRA_HUMAN  |
| 3.062 | 0.4375 | 1.43456  | Protein S100-A9                                                  | S10A9_HUMAN |
| 2.916 | 0.7291 | 1.33396  | Progesterone receptor                                            | PRGR_HUMAN  |
| 3.231 | 0.359  | 1.29776  | Serine/threonine-protein phosphatase PP1-gamma catalytic subunit | P36873      |
| 2.952 | 0.5904 | 1.26507  | Bile acid receptor                                               | NR1H4_HUMAN |
| 2.913 | 0.4855 | 1.23145  | Insulin-like growth factor IA                                    | P01343      |
| 2.745 | 0.6862 | 1.21944  | Heat shock cognate 71 kDa protein                                | P11142      |
| 3.132 | 0.5221 | 1.21292  | Trafficking protein particle complex subunit 3                   | O43617      |
| 2.734 | 0.9112 | 1.15668  | Serum albumin                                                    | ALBU_HUMAN  |
| 2.77  | 0.6925 | 1.14164  | Coagulation factor X                                             | FA10_HUMAN  |
| 3.126 | 0.4466 | 1.12454  | Lanosterol synthase                                              | ERG7_HUMAN  |
| 3.625 | 0.3625 | 1.08222  | Nuclear receptor subfamily 1 group 1 member 2                    | NR1I2_HUMAN |
| 3.19  | 0.5317 | 1.0798   | Alcohol dehydrogenase class-3                                    | ADHX_HUMAN  |
| 2.832 | 0.4719 | 1.06694  | Renin                                                            | RENI_HUMAN  |
| 3.589 | 0.3988 | 1.03501  | Dual specificity mitogen-activated protein kinase kinase 1       | MP2K1_HUMAN |
| 2.956 | 0.4927 | 0.979595 | Estrogen-related receptor gamma                                  | ERR3_HUMAN  |
| 2.722 | 0.3889 | 0.948941 | Medium-chain specific acyl-CoA dehydrogenase, mitochondrial      | ACADM_HUMAN |
| 2.931 | 0.5862 | 0.941044 | Prothrombin                                                      | THRB_HUMAN  |
| 3.005 | 0.4293 | 0.93745  | Retinoic acid receptor gamma                                     | RARG_HUMAN  |
| 2.716 | 0.5431 | 0.931372 | Cell division protein kinase 2                                   | P24941      |
| 3.141 | 0.3926 | 0.929767 | Ferrochelatase, mitochondrial                                    | P22830      |

|                    |       |        |          |                                                |              |
|--------------------|-------|--------|----------|------------------------------------------------|--------------|
|                    | 2.998 | 0.5997 | 0.874966 | SEC14-like protein 2                           | O76054       |
|                    | 2.864 | 0.2603 | 0.870251 | FK506-binding protein 3                        | FKBP3_HUMAN  |
|                    | 3.178 | 0.3973 | 0.870223 | Phospholipase A2, membrane associated          | P14555       |
|                    | 3.237 | 0.4624 | 0.87009  | Fatty acid-binding protein, heart              | FABPH_HUMAN  |
|                    | 2.715 | 0.6787 | 0.868726 | Dihydroorotate dehydrogenase, mitochondrial    | PYRD_HUMAN   |
|                    | 3.011 | 0.4301 | 0.809252 | Cytochrome P450 2C8                            | CP2C8_HUMAN  |
|                    | 2.647 | 0.8824 | 0.80723  | Transthyretin                                  | TTHY_HUMAN   |
|                    | 2.83  | 0.566  | 0.805289 | Sex hormone-binding globulin                   | SHBG_HUMAN   |
|                    | 2.845 | 0.4741 | 0.804296 | Flavin reductase                               | P30043       |
| <b>Denudatin B</b> | 4.43  | 0.5538 | 2.92413  | Glutathione S-transferase A1                   | P08263       |
|                    | 3.932 | 0.6553 | 2.7131   | Oxysterols receptor LXR-alpha                  | NR1H3_HUMAN  |
|                    | 3.753 | 0.7505 | 2.54761  | Catenin alpha-1                                | CTNA1_HUMAN  |
|                    | 3.796 | 0.6326 | 2.40038  | Cytochrome P450 2C9                            | CP2C9_HUMAN  |
|                    | 3.571 | 0.8927 | 2.38959  | cAMP-specific 3,5-cyclic phosphodiesterase 4B  | PDE4B_HUMAN  |
|                    | 3.903 | 0.4878 | 2.3141   | Vitamin D3 receptor                            | VDR_HUMAN    |
|                    | 3.629 | 0.9073 | 2.30104  | Estrogen-related receptor gamma                | P62508       |
|                    | 3.584 | 0.3982 | 2.29901  | Peptidyl-prolyl cis-trans isomerase FKBP1B     | FKBP1B_HUMAN |
|                    | 3.598 | 0.514  | 2.22197  | Histo-blood group ABO system transferase       | P16442       |
|                    | 3.555 | 0.711  | 2.16199  | Serine/threonine-protein kinase 6              | O14965       |
|                    | 3.717 | 0.4647 | 2.15551  | Heat shock protein HSP 90-beta                 | P08238       |
|                    | 3.866 | 0.5523 | 2.13035  | Insulin-like growth factor IA                  | P01343       |
|                    | 3.96  | 0.66   | 2.09735  | Glutathione-requiring prostaglandin D synthase | PTGD2_HUMAN  |
|                    | 3.709 | 0.7418 | 2.05261  | Sorbitol dehydrogenase                         | DHSO_HUMAN   |
|                    | 3.839 | 0.6399 | 1.95883  | Trafficking protein particle complex subunit 3 | O43617       |



|  |       |        |         |                                                     |             |
|--|-------|--------|---------|-----------------------------------------------------|-------------|
|  | 3.685 | 0.9212 | 1.94614 | Vitamin D-binding protein                           | VTDB_HUMAN  |
|  | 4.564 | 0.5071 | 1.82914 | Cellular retinoic acid-binding protein 2            | P29373      |
|  | 3.499 | 0.4999 | 1.78443 | Dual specificity protein kinase CLK1                | CLK1_HUMAN  |
|  | 3.576 | 0.7152 | 1.77814 | Estradiol 17-beta-dehydrogenase 1                   | P14061      |
|  | 3.84  | 0.3491 | 1.70111 | Caspase-1                                           | CASP1_HUMAN |
|  | 3.508 | 0.5846 | 1.66228 | Alpha-1-antitrypsin                                 | A1AT_HUMAN  |
|  | 3.765 | 0.5379 | 1.66087 | Cytochrome P450 2C8                                 | CP2C8_HUMAN |
|  | 3.52  | 0.5866 | 1.61505 | Oxysterols receptor LXR-beta                        | NR1H2_HUMAN |
|  | 3.788 | 0.5411 | 1.60723 | Nuclear receptor subfamily 1 group I member 2       | NR1I2_HUMAN |
|  | 3.725 | 0.4139 | 1.51572 | Leukotriene A-4 hydrolase                           | LKHA4_HUMAN |
|  | 3.825 | 0.4782 | 1.50867 | Ferrochelatase, mitochondrial                       | P22830      |
|  | 4.089 | 0.5111 | 1.50569 | Glucocorticoid receptor                             | GCR_HUMAN   |
|  | 3.577 | 0.5111 | 1.49032 | Interleukin-2                                       | IL2_HUMAN   |
|  | 3.749 | 0.5356 | 1.45909 | Thyroid hormone receptor alpha                      | P10827      |
|  | 3.247 | 0.8119 | 1.4391  | Retinoic acid receptor RXR-alpha                    | RXRA_HUMAN  |
|  | 3.865 | 0.5521 | 1.40904 | Sulfotransferase family cytosolic 2B member 1       | O00204      |
|  | 3.237 | 0.8092 | 1.3345  | Sex hormone-binding globulin                        | SHBG_HUMAN  |
|  | 3.528 | 0.5879 | 1.31776 | Tyrosine-protein kinase ITK/TSK                     | Q08881      |
|  | 3.76  | 0.5371 | 1.27571 | Fatty acid-binding protein, heart                   | FABPH_HUMAN |
|  | 3.31  | 0.331  | 1.20234 | Hydroxyacyl-coenzyme A dehydrogenase, mitochondrial | Q16836      |
|  | 3.257 | 0.8142 | 1.19291 | Mitogen-activated protein kinase 14                 | Q16539      |
|  | 3.318 | 0.6636 | 1.18801 | Poly [ADP-ribose] polymerase 1                      | P09874      |

|                         |       |        |          |                                                            |             |
|-------------------------|-------|--------|----------|------------------------------------------------------------|-------------|
|                         | 3.654 | 0.522  | 1.12006  | Estrogen sulfotransferase                                  | ST1E1_HUMAN |
|                         | 3.51  | 0.4388 | 1.10607  | Neprilysin                                                 | NEP_HUMAN   |
|                         | 3.626 | 0.4533 | 1.09738  | Retinoic acid receptor alpha                               | RARA_HUMAN  |
|                         | 3.778 | 0.5397 | 1.08819  | Fatty acid-binding protein, brain                          | FABP7_HUMAN |
|                         | 3.68  | 0.5257 | 1.06614  | Gastrotropin                                               | FABP6_HUMAN |
|                         | 3.594 | 0.5989 | 1.06201  | Alcohol dehydrogenase class-3                              | ADHX_HUMAN  |
|                         | 3.342 | 0.557  | 1.06104  | Peroxisome proliferator-activated receptor alpha           | PPARA_HUMAN |
|                         | 3.778 | 0.6296 | 1.04648  | Phosphoenolpyruvate carboxykinase, cytosolic [GTP]         | P35558      |
|                         | 3.802 | 0.4752 | 1.02167  | Protein-glutamine gamma-glutamyltransferase E              | TGM3_HUMAN  |
|                         | 3.984 | 0.4426 | 0.99517  | Dual specificity mitogen-activated protein kinase kinase 1 | MP2K1_HUMAN |
|                         | 3.272 | 0.5454 | 0.97807  | Leukocyte elastase                                         | ELNE_HUMAN  |
|                         | 3.367 | 0.3741 | 0.970792 | Glutathione S-transferase Mu 1                             | GSTM1_HUMAN |
|                         | 3.524 | 0.3916 | 0.943358 | Glutathione S-transferase A3                               | Q16772      |
| <b>Ethyl linolenate</b> | 4.099 | 0.6831 | 2.73197  | Insulin-like growth factor IA                              | P01343      |
|                         | 4.049 | 0.6749 | 2.2901   | Peroxisome proliferator-activated receptor alpha           | PPARA_HUMAN |
|                         | 4.355 | 0.6222 | 2.26794  | Lanosterol synthase                                        | ERG7_HUMAN  |
|                         | 4.49  | 0.3454 | 1.96144  | Endothelial protein C receptor                             | EPCR_HUMAN  |
|                         | 3.842 | 0.7685 | 1.94413  | Estrogen receptor                                          | ESR1_HUMAN  |
|                         | 4.552 | 0.6504 | 1.92855  | Fatty acid-binding protein, brain                          | FABP7_HUMAN |
|                         | 3.81  | 0.762  | 1.80818  | Tyrosine-protein kinase ITK/TSK                            | Q08881      |
|                         | 3.841 | 0.6402 | 1.79201  | Flavin reductase                                           | P30043      |
|                         | 3.879 | 0.431  | 1.77769  | Phosphatidylinositol 3-kinase regulatory subunit alpha     | P85A_HUMAN  |

|  |       |        |         |                                                       |             |
|--|-------|--------|---------|-------------------------------------------------------|-------------|
|  | 4.072 | 0.6786 | 1.75172 | Trafficking protein particle complex subunit 3        | O43617      |
|  | 4.189 | 0.6981 | 1.71712 | Alcohol dehydrogenase class-3                         | ADHX_HUMAN  |
|  | 3.666 | 0.9165 | 1.70367 | Mitogen-activated protein kinase 14                   | Q16539      |
|  | 4.027 | 0.8054 | 1.67133 | SEC14-like protein 2                                  | O76054      |
|  | 3.628 | 0.9071 | 1.66482 | Nuclear receptor ROR-alpha                            | RORA_HUMAN  |
|  | 4.535 | 0.5039 | 1.63631 | Retinoic acid receptor beta                           | RARB_HUMAN  |
|  | 4.066 | 0.5809 | 1.62715 | Cytochrome P450 2C8                                   | CP2C8_HUMAN |
|  | 3.696 | 0.7392 | 1.60356 | cAMP-dependent protein kinase catalytic subunit alpha | P00517      |
|  | 3.912 | 0.5588 | 1.59176 | Interleukin-2                                         | IL2_HUMAN   |
|  | 3.84  | 0.64   | 1.52261 | Tyrosine-protein kinase JAK3                          | JAK3_HUMAN  |
|  | 4.281 | 0.6115 | 1.51064 | Fatty acid-binding protein, heart                     | FABPH_HUMAN |
|  | 3.92  | 0.56   | 1.48633 | Retinoic acid receptor gamma                          | RARG_HUMAN  |
|  | 3.615 | 0.6025 | 1.47703 | Ganglioside GM2 activator                             | P17900      |
|  | 4.407 | 0.4006 | 1.47603 | Phosphatidylcholine transfer protein                  | Q9UKL6      |
|  | 3.754 | 0.4693 | 1.47393 | Heat shock protein HSP 90-beta                        | P08238      |
|  | 3.822 | 0.9554 | 1.46975 | Vitamin D-binding protein                             | VTDB_HUMAN  |
|  | 3.819 | 0.7638 | 1.46901 | Mineralocorticoid receptor                            | MCR_HUMAN   |
|  | 4.075 | 0.5821 | 1.40666 | Hepatocyte nuclear factor 4-gamma                     | Q14541      |
|  | 3.798 | 0.5426 | 1.40023 | 72 kDa type IV collagenase                            | MMP2_HUMAN  |
|  | 4.672 | 0.5191 | 1.38093 | Cellular retinoic acid-binding protein 2              | P29373      |
|  | 3.761 | 0.5373 | 1.35657 | Proactivator polypeptide                              | P07602      |
|  | 3.485 | 0.8712 | 1.35049 | Peroxisome proliferator-activated receptor delta      | Q03181      |
|  | 3.922 | 0.7844 | 1.34752 | Estradiol 17-beta-dehydrogenase                       | P14061      |

|  |       |        |         |                                                            |             |
|--|-------|--------|---------|------------------------------------------------------------|-------------|
|  |       |        |         | 1                                                          |             |
|  | 3.49  | 0.698  | 1.30621 | Estrogen receptor beta                                     | Q92731      |
|  | 3.833 | 0.6389 | 1.30035 | Hepatocyte growth factor receptor                          | MET_HUMAN   |
|  | 3.845 | 0.5493 | 1.29253 | Tyrosine-protein kinase ZAP-70                             | ZAP70_HUMAN |
|  | 4.523 | 0.5025 | 1.27072 | Dual specificity mitogen-activated protein kinase kinase 1 | MP2K1_HUMAN |
|  | 3.825 | 0.6376 | 1.2564  | Glutathione S-transferase A1                               | P08263      |
|  | 3.757 | 0.6262 | 1.25589 | Integrin alpha-L                                           | ITAL_HUMAN  |
|  | 3.758 | 0.7516 | 1.24687 | Corticosteroid 11-beta-dehydrogenase isozyme 1             | DHI1_HUMAN  |
|  | 3.776 | 0.6294 | 1.23261 | cAMP-specific 3,5-cyclic phosphodiesterase 4D              | PDE4D_HUMAN |
|  | 3.704 | 0.7408 | 1.2084  | Tyrosine-protein phosphatase non-receptor type 11          | PTN11_HUMAN |
|  | 3.631 | 0.7262 | 1.19953 | Alpha-tocopherol transfer protein                          | P49638      |
|  | 3.519 | 0.7039 | 1.16705 | Tyrosine-protein kinase SYK                                | KSYK_HUMAN  |
|  | 3.622 | 0.6037 | 1.16324 | Cytochrome P450 2C9                                        | CP2C9_HUMAN |
|  | 3.833 | 0.5476 | 1.12867 | Protein kinase C theta type                                | KPCT_HUMAN  |
|  | 3.625 | 0.4531 | 1.12366 | Vitamin D3 receptor                                        | VDR_HUMAN   |
|  | 3.468 | 0.6936 | 1.11422 | E3 ubiquitin-protein ligase Mdm2                           | MDM2_HUMAN  |
|  | 3.905 | 0.5578 | 1.11416 | Thyroid hormone receptor alpha                             | P10827      |
|  | 3.558 | 0.7117 | 1.10086 | Bile acid receptor                                         | NR1H4_HUMAN |
|  | 3.875 | 0.4305 | 1.09107 | Proto-oncogene tyrosine-protein kinase ABL1                | P00519      |
|  | 3.587 | 0.3261 | 1.07293 | FK506-binding protein 3                                    | FKBP3_HUMAN |
|  | 3.913 | 0.4891 | 1.06912 | Ferrochelatase, mitochondrial                              | P22830      |
|  | 3.671 | 0.6119 | 1.04868 | Retinol-binding protein 4                                  | RET4_HUMAN  |
|  | 3.896 | 0.4871 | 1.04256 | Retinoic acid receptor alpha                               | RARA_HUMAN  |
|  | 4.158 | 0.5198 | 1.02639 | Glucocorticoid receptor                                    | GCR_HUMAN   |

|                          |       |        |          |                                                                  |             |
|--------------------------|-------|--------|----------|------------------------------------------------------------------|-------------|
|                          |       |        |          |                                                                  | AN          |
|                          | 3.616 | 0.7233 | 1.00233  | Calmodulin                                                       | CALM_HUMAN  |
|                          | 4.39  | 0.439  | 1.00224  | Retinoic acid receptor RXR-beta                                  | RXRB_HUMAN  |
|                          | 3.511 | 0.5852 | 0.991203 | Alpha-1-antitrypsin                                              | A1AT_HUMAN  |
|                          | 3.616 | 0.5165 | 0.948807 | Neutrophil gelatinase-associated lipocalin                       | NGAL_HUMAN  |
|                          | 3.765 | 0.6274 | 0.939705 | Adenosine kinase                                                 | P55263      |
|                          | 3.69  | 0.5272 | 0.938884 | Serine--pyruvate aminotransferase                                | SPYA_HUMAN  |
|                          | 3.475 | 0.6949 | 0.936721 | Poly [ADP-ribose] polymerase 1                                   | P09874      |
|                          | 3.768 | 0.4187 | 0.894738 | Serine/threonine-protein phosphatase PP1-gamma catalytic subunit | P36873      |
|                          | 3.595 | 0.719  | 0.851367 | Wiskott-Aldrich syndrome protein                                 | WASP_HUMAN  |
|                          | 3.397 | 0.8493 | 0.840306 | ADAM 17                                                          | ADA17_HUMAN |
|                          | 3.853 | 0.5504 | 0.825037 | Gastrotropin                                                     | FABP6_HUMAN |
| <b>Ethyl oleate (NF)</b> | 4.665 | 0.6664 | 2.95052  | Cytochrome P450 2C8                                              | CP2C8_HUMAN |
|                          | 4.492 | 0.7487 | 2.71594  | Trafficking protein particle complex subunit 3                   | O43617      |
|                          | 4.456 | 0.7426 | 2.33543  | Alcohol dehydrogenase class-3                                    | ADHX_HUMAN  |
|                          | 4.734 | 0.6763 | 2.28966  | Fatty acid-binding protein, brain                                | FABP7_HUMAN |
|                          | 3.87  | 0.9676 | 2.02051  | ADAM 17                                                          | ADA17_HUMAN |
|                          | 4.28  | 0.3891 | 2.00662  | Caspase-1                                                        | CASP1_HUMAN |
|                          | 4.153 | 0.8307 | 2.00605  | SEC14-like protein 2                                             | O76054      |
|                          | 4.232 | 0.7053 | 1.99455  | Glutathione-requiring prostaglandin D synthase                   | PTGD2_HUMAN |
|                          | 3.782 | 0.7564 | 1.98304  | Corticosteroid 11-beta-dehydrogenase isozyme 1                   | P28845      |
|                          | 4.471 | 0.3439 | 1.95979  | Endothelial protein C receptor                                   | EPCR_HUMAN  |

|  |       |        |         |                                                   |             |
|--|-------|--------|---------|---------------------------------------------------|-------------|
|  | 3.674 | 0.9186 | 1.89642 | Nuclear receptor ROR-alpha                        | RORA_HUMAN  |
|  | 3.896 | 0.487  | 1.83666 | Vitamin D3 receptor                               | VDR_HUMAN   |
|  | 5.159 | 0.6448 | 1.80021 | Retinol-binding protein 4                         | RET4_HUMAN  |
|  | 3.703 | 0.4629 | 1.72861 | Heme oxygenase 1                                  | HMOX1_HUMAN |
|  | 4.142 | 0.5916 | 1.68171 | Thyroid hormone receptor alpha                    | P10827      |
|  | 3.654 | 0.9136 | 1.67146 | Progesterone receptor                             | PRGR_HUMAN  |
|  | 4.189 | 0.5236 | 1.6232  | Ferrochelatase, mitochondrial                     | P22830      |
|  | 3.867 | 0.5525 | 1.60961 | 72 kDa type IV collagenase                        | MMP2_HUMAN  |
|  | 3.695 | 0.739  | 1.59986 | Vascular endothelial growth factor receptor 2     | P35968      |
|  | 3.816 | 0.7632 | 1.58735 | Tyrosine-protein phosphatase non-receptor type 11 | PTN11_HUMAN |
|  | 4.127 | 0.5896 | 1.56317 | Hepatocyte nuclear factor 4-gamma                 | Q14541      |
|  | 3.746 | 0.6243 | 1.54467 | Peroxisome proliferator-activated receptor alpha  | PPARA_HUMAN |
|  | 3.686 | 0.7372 | 1.53715 | Bile acid receptor                                | NR1H4_HUMAN |
|  | 3.658 | 0.7316 | 1.50973 | Aldo-keto reductase family 1 member C1            | Q04828      |
|  | 4.092 | 0.5115 | 1.48813 | Retinoic acid receptor alpha                      | RARA_HUMAN  |
|  | 3.882 | 0.6469 | 1.48704 | Hepatocyte growth factor receptor                 | MET_HUMAN   |
|  | 3.956 | 0.5651 | 1.47175 | Lanosterol synthase                               | ERG7_HUMAN  |
|  | 3.83  | 0.5471 | 1.47123 | Interleukin-2                                     | IL2_HUMAN   |
|  | 3.688 | 0.7377 | 1.45221 | Sex hormone-binding globulin                      | SHBG_HUMAN  |
|  | 3.833 | 0.4791 | 1.44411 | Betaine--homocysteine S-methyltransferase 1       | Q93088      |
|  | 3.501 | 0.8752 | 1.39557 | Coagulation factor X                              | FA10_HUMAN  |
|  | 3.585 | 0.717  | 1.38526 | cAMP-dependent protein kinase                     | P00517      |

|       |        |          |  |                                                        |             |
|-------|--------|----------|--|--------------------------------------------------------|-------------|
|       |        |          |  | catalytic subunit alpha                                |             |
| 3.558 | 0.7116 | 1.38033  |  | Steroid hormone receptor ERR1                          | P11474      |
| 3.773 | 0.6289 | 1.36754  |  | Integrin alpha-L                                       | ITAL_HUMAN  |
| 3.659 | 0.6098 | 1.36484  |  | Flavin reductase                                       | P30043      |
| 3.531 | 0.5885 | 1.33688  |  | Ganglioside GM2 activator                              | P17900      |
| 5.857 | 0.5857 | 1.33198  |  | Cellular retinoic acid-binding protein 2               | P29373      |
| 3.605 | 0.6009 | 1.29724  |  | Alpha-1-antitrypsin                                    | A1AT_HUMAN  |
| 3.793 | 0.5419 | 1.2636   |  | Retinoic acid receptor gamma                           | RARG_HUMAN  |
| 4.064 | 0.5806 | 1.25692  |  | Gastrotropin                                           | FABP6_HUMAN |
| 4.253 | 0.3866 | 1.24714  |  | Phosphatidylcholine transfer protein                   | Q9UKL6      |
| 3.709 | 0.9273 | 1.23736  |  | Vitamin D-binding protein                              | VTDB_HUMAN  |
| 3.679 | 0.6132 | 1.18804  |  | Tyrosine-protein kinase JAK3                           | JAK3_HUMAN  |
| 3.551 | 0.5918 | 1.14713  |  | Leukocyte elastase                                     | ELNE_HUMAN  |
| 3.604 | 0.7207 | 1.0827   |  | Sorbitol dehydrogenase                                 | DHSO_HUMAN  |
| 3.427 | 0.8567 | 1.0801   |  | Mitogen-activated protein kinase 14                    | Q16539      |
| 3.824 | 0.5462 | 1.05777  |  | Nuclear receptor subfamily 1 group 1 member 2          | NR112_HUMAN |
| 3.712 | 0.6186 | 1.04924  |  | Tyrosine-protein kinase SYK                            | KSYK_HUMAN  |
| 3.396 | 0.5659 | 1.04482  |  | cGMP-specific 3,5-cyclic phosphodiesterase             | PDE5A_HUMAN |
| 3.827 | 0.4253 | 1.04411  |  | Growth factor receptor-bound protein 2                 | GRB2_HUMAN  |
| 3.572 | 0.3969 | 1.03269  |  | Phosphatidylinositol 3-kinase regulatory subunit alpha | P85A_HUMAN  |
| 3.668 | 0.6113 | 1.03242  |  | Tyrosine-protein kinase ITK/TSK                        | Q08881      |
| 3.688 | 0.5269 | 1.00802  |  | Tyrosine-protein kinase ZAP-70                         | ZAP70_HUMAN |
| 3.325 | 0.665  | 0.991656 |  | Estrogen receptor beta                                 | Q92731      |

|                   |       |        |          |                                                            |             |
|-------------------|-------|--------|----------|------------------------------------------------------------|-------------|
|                   | 3.735 | 0.5336 | 0.990519 | Tyrosine-protein kinase JAK2                               | JAK2_HUMAN  |
|                   | 4.299 | 0.4777 | 0.978797 | Dual specificity mitogen-activated protein kinase kinase 1 | MP2K1_HUMAN |
|                   | 3.798 | 0.5425 | 0.96656  | Tyrosine-protein kinase HCK                                | HCK_HUMAN   |
|                   | 3.711 | 0.5301 | 0.938114 | Protein kinase C theta type                                | KPCT_HUMAN  |
|                   | 3.656 | 0.5223 | 0.933626 | Serine--pyruvate aminotransferase                          | SPYA_HUMAN  |
|                   | 4.317 | 0.4317 | 0.929643 | Retinoic acid receptor RXR-beta                            | RXRΒ_HUMAN  |
|                   | 3.59  | 0.718  | 0.924051 | Wiskott-Aldrich syndrome protein                           | WASP_HUMAN  |
|                   | 3.42  | 0.5699 | 0.898297 | Insulin-like growth factor IA                              | P01343      |
|                   | 3.868 | 0.5525 | 0.881978 | Sulfotransferase family cytosolic 2B member 1              | O00204      |
|                   | 3.625 | 0.6042 | 0.861503 | Glutathione S-transferase A1                               | P08263      |
|                   | 4.026 | 0.4473 | 0.85726  | Retinoic acid receptor beta                                | RARB_HUMAN  |
|                   | 3.526 | 0.7052 | 0.851513 | Calmodulin                                                 | CALM_HUMAN  |
|                   | 3.482 | 0.5803 | 0.839282 | Receptor tyrosine-protein kinase erbB-4                    | ERBB4_HUMAN |
|                   | 3.518 | 0.5863 | 0.827023 | Oxysterols receptor LXR-alpha                              | NR1H3_HUMAN |
|                   | 3.935 | 0.6558 | 0.819932 | Phosphoenolpyruvate carboxykinase, cytosolic [GTP]         | P35558      |
| <b>Fucosterol</b> | 4.563 | 0.9125 | 2.80135  | SEC14-like protein 2                                       | O76054      |
|                   | 4.634 | 0.9268 | 2.7953   | Estradiol 17-beta-dehydrogenase 1                          | P14061      |
|                   | 4.499 | 0.7498 | 2.78733  | Glutathione S-transferase A1                               | P08263      |
|                   | 3.892 | 0.7783 | 2.42625  | Histone deacetylase 8                                      | Q9BY41      |
|                   | 3.822 | 0.9556 | 2.27279  | Progesterone receptor                                      | PRGR_HUMAN  |
|                   | 3.721 | 0.9303 | 2.15721  | Nuclear receptor ROR-alpha                                 | RORA_HUMAN  |
|                   | 3.78  | 0.9451 | 2.15134  | Mineralocorticoid receptor                                 | MCR_HUMAN   |
|                   | 4.165 | 0.6941 | 1.99454  | Trafficking protein particle complex subunit 3             | O43617      |



|  |       |        |         |                                                           |             |
|--|-------|--------|---------|-----------------------------------------------------------|-------------|
|  | 4.48  | 0.64   | 1.87187 | Sulfotransferase family cytosolic<br>2B member 1          | O00204      |
|  | 3.757 | 0.7515 | 1.83028 | Bile acid receptor                                        | NR1H4_HUMAN |
|  | 5.305 | 0.6632 | 1.82133 | Retinol-binding protein 4                                 | RET4_HUMAN  |
|  | 3.69  | 0.7381 | 1.79763 | cAMP-dependent protein kinase<br>catalytic subunit alpha  | P00517      |
|  | 4.134 | 0.689  | 1.79041 | Glutathione-requiring<br>prostaglandin D synthase         | PTGD2_HUMAN |
|  | 4.251 | 0.6073 | 1.78356 | Hepatocyte nuclear factor 4-<br>gamma                     | Q14541      |
|  | 4.446 | 0.741  | 1.76457 | Sex hormone-binding globulin                              | SHBG_HUMAN  |
|  | 3.809 | 0.7619 | 1.75308 | Prothrombin                                               | THRB_HUMAN  |
|  | 3.599 | 0.8998 | 1.71261 | Mitogen-activated protein kinase<br>14                    | Q16539      |
|  | 3.808 | 0.7616 | 1.68238 | Calmodulin                                                | CALM_HUMAN  |
|  | 3.722 | 0.7445 | 1.62985 | Androgen receptor                                         | ANDR_HUMAN  |
|  | 4.239 | 0.5299 | 1.61035 | Retinoic acid receptor gamma                              | RARG_HUMAN  |
|  | 4.181 | 0.5226 | 1.59436 | Ferrochelatase, mitochondrial                             | P22830      |
|  | 3.731 | 0.4145 | 1.56658 | Phosphatidylinositol 3-kinase<br>regulatory subunit alpha | P85A_HUMAN  |
|  | 3.981 | 0.5687 | 1.52967 | Cytochrome P450 2C8                                       | CP2C8_HUMAN |
|  | 3.792 | 0.7585 | 1.49312 | Corticosteroid 11-beta-<br>dehydrogenase isozyme 1        | DH11_HUMAN  |
|  | 3.508 | 0.8771 | 1.46313 | Collagenase 3                                             | MMP13_HUMAN |
|  | 3.706 | 0.6176 | 1.42273 | Oxysterols receptor LXR-alpha                             | NR1H3_HUMAN |
|  | 3.71  | 0.742  | 1.42054 | Tyrosine-protein phosphatase<br>non-receptor type 11      | PTN11_HUMAN |
|  | 3.911 | 0.6518 | 1.38603 | Adenosine kinase                                          | P55263      |
|  | 3.612 | 0.6019 | 1.3827  | Flavin reductase                                          | P30043      |
|  | 3.929 | 0.4912 | 1.36666 | Caspase-3                                                 | CASP3_HUMAN |

|  |       |        |          |                                                                            |             |
|--|-------|--------|----------|----------------------------------------------------------------------------|-------------|
|  | 3.529 | 0.7058 | 1.34419  | Aldo-keto reductase family 1 member C1                                     | Q04828      |
|  | 4.315 | 0.4315 | 1.33911  | Vitamin D3 receptor                                                        | VDR_HUMAN   |
|  | 4.104 | 0.5862 | 1.32976  | Gastrotropin                                                               | FABP6_HUMAN |
|  | 3.527 | 0.7054 | 1.31376  | Serine/threonine-protein kinase Chk1                                       | CHK1_HUMAN  |
|  | 3.664 | 0.5234 | 1.2809   | 72 kDa type IV collagenase                                                 | MMP2_HUMAN  |
|  | 4.079 | 0.3138 | 1.22992  | Endothelial protein C receptor                                             | EPCR_HUMAN  |
|  | 3.557 | 0.4446 | 1.21096  | Heat shock protein HSP 90-beta                                             | P08238      |
|  | 3.648 | 0.608  | 1.176    | Oxysterols receptor LXR-beta                                               | NR1H2_HUMAN |
|  | 3.554 | 0.5923 | 1.17138  | Receptor tyrosine-protein kinase erbB-4                                    | ERBB4_HUMAN |
|  | 3.657 | 0.5224 | 1.15494  | Protein farnesyltransferase/geranylgeranyltransferase type-1 subunit alpha | FNTA_HUMAN  |
|  | 4.452 | 0.4946 | 1.14288  | Dual specificity mitogen-activated protein kinase kinase 1                 | MP2K1_HUMAN |
|  | 3.302 | 0.8254 | 1.13966  | Bile salt sulfotransferase                                                 | Q06520      |
|  | 3.601 | 0.6001 | 1.11438  | Ephrin type-B receptor 4                                                   | EPHB4_HUMAN |
|  | 3.559 | 0.5084 | 0.998922 | Interleukin-2                                                              | IL2_HUMAN   |
|  | 3.807 | 0.4759 | 0.986142 | Retinoic acid receptor alpha                                               | RARA_HUMAN  |
|  | 3.321 | 0.6642 | 0.982093 | Glutathione S-transferase P                                                | GSTP1_HUMAN |
|  | 3.786 | 0.6311 | 0.981895 | Alcohol dehydrogenase class-3                                              | ADHX_HUMAN  |
|  | 3.653 | 0.4567 | 0.978732 | Proto-oncogene tyrosine-protein kinase ABL1                                | P00519      |
|  | 5.504 | 0.5504 | 0.933987 | Cellular retinoic acid-binding protein 2                                   | P29373      |
|  | 3.6   | 0.6    | 0.916695 | Tyrosine-protein kinase SYK                                                | KSYK_HUMAN  |
|  | 3.526 | 0.8814 | 0.902583 | Vitamin D-binding protein                                                  | VTDB_HUMAN  |

|                    |       |        |          |                                                |             |
|--------------------|-------|--------|----------|------------------------------------------------|-------------|
|                    | 3.952 | 0.5646 | 0.867685 | Lactylglutathione lyase                        | LGUL_HUMAN  |
|                    | 3.412 | 0.5686 | 0.857526 | NAD(P)H dehydrogenase [quinone] 1              | NQO1_HUMAN  |
|                    | 3.311 | 0.8279 | 0.842497 | Estrogen receptor                              | ESR1_HUMAN  |
|                    | 3.329 | 0.5548 | 0.840394 | Alpha-1-antitrypsin                            | A1AT_HUMAN  |
|                    | 4.257 | 0.4257 | 0.825894 | Retinoic acid receptor RXR-beta                | RXRβ_HUMAN  |
|                    | 3.362 | 0.6725 | 0.814543 | Alpha-tocopherol transfer protein              | P49638      |
| <b>Kadsurenone</b> | 4.517 | 0.5647 | 3.81561  | Vitamin D3 receptor                            | VDR_HUMAN   |
|                    | 4.468 | 0.4062 | 3.23504  | Caspase-1                                      | CASP1_HUMAN |
|                    | 3.822 | 0.546  | 2.82912  | Histo-blood group ABO system transferase       | P16442      |
|                    | 3.982 | 0.7964 | 2.58248  | Corticosteroid 11-beta-dehydrogenase isozyme 1 | DH11_HUMAN  |
|                    | 3.636 | 0.909  | 2.46722  | Sex hormone-binding globulin                   | SHBG_HUMAN  |
|                    | 4.128 | 0.688  | 2.40025  | Glutathione-requiring prostaglandin D synthase | PTGD2_HUMAN |
|                    | 3.776 | 0.6294 | 2.22691  | Cytochrome P450 2C9                            | CP2C9_HUMAN |
|                    | 3.669 | 0.7338 | 2.10364  | Aldo-keto reductase family 1 member C1         | Q04828      |
|                    | 3.553 | 0.8882 | 2.01445  | Mitogen-activated protein kinase 14            | Q16539      |
|                    | 3.512 | 0.8779 | 1.98878  | Insulin-like growth factor 1 receptor          | P08069      |
|                    | 3.701 | 0.7401 | 1.90972  | Sorbitol dehydrogenase                         | DHSO_HUMAN  |
|                    | 3.82  | 0.5456 | 1.89891  | Insulin-like growth factor IA                  | P01343      |
|                    | 3.629 | 0.5185 | 1.84804  | Deoxycytidine kinase                           | DCK_HUMAN   |
|                    | 3.854 | 0.4282 | 1.84788  | Neutrophil gelatinase-associated lipocalin     | NGAL_HUMAN  |
|                    | 3.68  | 0.6133 | 1.83683  | Oxysterols receptor LXR-alpha                  | NR1H3_HUMAN |
|                    | 3.594 | 0.5134 | 1.76154  | cAMP-dependent protein kinase,                 | P00517      |

|       |        |         |                                                    |             |
|-------|--------|---------|----------------------------------------------------|-------------|
|       |        |         | alpha-catalytic subunit                            |             |
| 3.772 | 0.4715 | 1.72721 | Neprilysin                                         | NEP_HUMAN   |
| 3.781 | 0.6302 | 1.71057 | Trafficking protein particle complex subunit 3     | O43617      |
| 3.842 | 0.7683 | 1.69173 | Bile salt sulfotransferase                         | Q06520      |
| 3.55  | 0.5917 | 1.67749 | Leukocyte elastase                                 | ELNE_HUMAN  |
| 3.873 | 0.5533 | 1.66677 | Thyroid hormone receptor alpha                     | P10827      |
| 3.682 | 0.5259 | 1.65488 | Interleukin-2                                      | IL2_HUMAN   |
| 3.933 | 0.5619 | 1.63877 | Estrogen sulfotransferase                          | ST1E1_HUMAN |
| 3.408 | 0.8519 | 1.51526 | Collagenase 3                                      | MMP13_HUMAN |
| 3.649 | 0.5213 | 1.44528 | Retinoic acid receptor gamma                       | RARG_HUMAN  |
| 3.47  | 0.5784 | 1.36346 | Oxysterols receptor LXR-beta                       | NR1H2_HUMAN |
| 3.372 | 0.6745 | 1.35198 | Catenin alpha-1                                    | CTNA1_HUMAN |
| 3.304 | 0.8261 | 1.34586 | Estrogen receptor                                  | ESR1_HUMAN  |
| 3.718 | 0.5312 | 1.33403 | Nuclear receptor subfamily 1 group I member 2      | NR1I2_HUMAN |
| 3.56  | 0.5933 | 1.22033 | Hepatocyte growth factor receptor                  | MET_HUMAN   |
| 3.259 | 0.8148 | 1.21907 | Mineralocorticoid receptor                         | MCR_HUMAN   |
| 3.336 | 0.8341 | 1.1848  | ADAM 17                                            | ADA17_HUMAN |
| 3.268 | 0.8169 | 1.17304 | cAMP-specific 3,5-cyclic phosphodiesterase 4B      | PDE4B_HUMAN |
| 3.479 | 0.5799 | 1.13376 | Retinol-binding protein 4                          | RET4_HUMAN  |
| 3.455 | 0.5759 | 1.10575 | Phosphoenolpyruvate carboxykinase, cytosolic [GTP] | P35558      |
| 3.843 | 0.4804 | 1.08108 | Histamine N-methyltransferase                      | P50135      |
| 3.379 | 0.4224 | 1.07072 | Heat shock protein HSP 90-beta                     | P08238      |
| 3.633 | 0.4541 | 1.05566 | Glucose-6-phosphate isomerase                      | G6PI_HUMAN  |

|                 |       |        |          |                                                            |             |
|-----------------|-------|--------|----------|------------------------------------------------------------|-------------|
|                 | 3.314 | 0.5523 | 1.05185  | Serine hydroxymethyltransferase, cytosolic                 | GLYC_HUMAN  |
|                 | 3.451 | 0.5752 | 1.0474   | Triosephosphate isomerase                                  | TPIS_HUMAN  |
|                 | 3.358 | 0.6716 | 1.04266  | Alpha-tocopherol transfer protein                          | P49638      |
|                 | 4.048 | 0.4498 | 1.03537  | Dual specificity mitogen-activated protein kinase kinase 1 | MP2K1_HUMAN |
|                 | 4.996 | 0.4996 | 1.0053   | Cellular retinoic acid-binding protein 2                   | P29373      |
|                 | 3.56  | 0.3956 | 1.00196  | Nitric oxide synthase, inducible                           | NOS2_HUMAN  |
|                 | 3.547 | 0.5912 | 0.985885 | Adenosine kinase                                           | P55263      |
|                 | 3.633 | 0.3633 | 0.963671 | Glutathione S-transferase Mu 1                             | GSTM1_HUMAN |
|                 | 3.224 | 0.6448 | 0.950866 | Macrophage metalloelastase                                 | MMP12_HUMAN |
|                 | 4.027 | 0.4027 | 0.926269 | Retinoic acid receptor RXR-beta                            | RXR_B_HUMAN |
|                 | 3.45  | 0.3833 | 0.924547 | E-selectin                                                 | LYAM2_HUMAN |
|                 | 3.417 | 0.4271 | 0.917453 | Chymase                                                    | CMA1_HUMAN  |
|                 | 3.411 | 0.4264 | 0.910241 | Betaine--homocysteine S-methyltransferase 1                | Q93088      |
|                 | 3.571 | 0.4464 | 0.87403  | Retinoic acid receptor alpha                               | RARA_HUMAN  |
|                 | 3.612 | 0.4515 | 0.847344 | Glucokinase                                                | HXK4_HUMAN  |
|                 | 3.183 | 0.3978 | 0.826918 | Heme oxygenase 1                                           | HMOX1_HUMAN |
|                 | 3.425 | 0.6851 | 0.816335 | SEC14-like protein 2                                       | O76054      |
|                 | 3.534 | 0.5891 | 0.80976  | Alcohol dehydrogenase class-3                              | ADHX_HUMAN  |
| <b>Karanjin</b> | 4.027 | 0.5753 | 4.09216  | Tyrosine-protein kinase HCK                                | HCK_HUMAN   |
|                 | 3.654 | 0.4567 | 3.81185  | Coagulation factor XI                                      | FA11_HUMAN  |
|                 | 3.446 | 0.6892 | 3.80512  | Carbonyl reductase [NADPH] 1                               | CBR1_HUMAN  |
|                 | 3.596 | 0.5994 | 3.27056  | Proto-oncogene tyrosine-protein kinase LCK                 | LCK_HUMAN   |

|  |       |        |         |                                                                            |             |
|--|-------|--------|---------|----------------------------------------------------------------------------|-------------|
|  | 3.467 | 0.4333 | 2.7748  | Betaine--homocysteine S-methyltransferase 1                                | Q93088      |
|  | 3.154 | 0.6307 | 2.38835 | Glycogen synthase kinase-3 beta                                            | P49841      |
|  | 3.496 | 0.3885 | 2.03511 | 5(3)-deoxyribonucleotidase, mitochondrial                                  | Q9NPB1      |
|  | 3.377 | 0.4221 | 1.97482 | Glucose-6-phosphate isomerase                                              | G6PI_HUMAN  |
|  | 3.554 | 0.5077 | 1.95661 | Cystathionine beta-synthase                                                | P35520      |
|  | 2.968 | 0.4946 | 1.89318 | Fatty acid-binding protein, adipocyte                                      | FABP4_HUMAN |
|  | 3.117 | 0.5196 | 1.85843 | Dihydroorotate dehydrogenase, mitochondrial                                | PYRD_HUMAN  |
|  | 3.566 | 0.4457 | 1.85572 | Protein-glutamine gamma-glutamyltransferase E                              | TGM3_HUMAN  |
|  | 3.551 | 0.3551 | 1.65401 | 3 histone mRNA exonuclease 1                                               | Q8IV48      |
|  | 2.916 | 0.5832 | 1.65145 | Heat shock protein HSP 90-alpha                                            | HS90A_HUMAN |
|  | 2.934 | 0.7334 | 1.61618 | cAMP-specific 3,5-cyclic phosphodiesterase 4D                              | PDE4D_HUMAN |
|  | 2.946 | 0.7365 | 1.61394 | Mitogen-activated protein kinase 14                                        | Q16539      |
|  | 2.912 | 0.728  | 1.58973 | B-Raf proto-oncogene serine/threonine-protein kinase                       | BRAF1_HUMAN |
|  | 2.943 | 0.7359 | 1.54589 | Protein farnesyltransferase/geranylgeranyltransferase type-1 subunit alpha | FNTA_HUMAN  |
|  | 2.865 | 0.9551 | 1.50248 | Glutathione S-transferase P                                                | GSTP1_HUMAN |
|  | 2.89  | 0.7226 | 1.49786 | Cyclin-A2                                                                  | CCNA2_HUMAN |
|  | 2.96  | 0.4934 | 1.48098 | Thymidylate synthase                                                       | TYSY_HUMAN  |
|  | 2.868 | 0.5735 | 1.46582 | Cyclin-T1                                                                  | CCNT1_HUMAN |
|  | 2.888 | 0.7219 | 1.45527 | Macrophage migration inhibitory factor                                     | MIF_HUMAN   |
|  | 2.851 | 0.9503 | 1.42776 | Mitogen-activated protein kinase 10                                        | MK10_HUMAN  |
|  | 3.204 | 0.4577 | 1.4244  | Nuclear receptor subfamily 1 group 1 member 2                              | NR1I2_HUMAN |
|  | 2.85  | 0.9501 | 1.40814 | Carbonic anhydrase 2                                                       | CAH2_HUMAN  |

|       |        |         |                                                       |             |
|-------|--------|---------|-------------------------------------------------------|-------------|
|       |        |         |                                                       | MAN         |
| 2.891 | 0.5782 | 1.40777 | Methionine aminopeptidase 2                           | AMPM2_HUMAN |
| 2.892 | 0.7231 | 1.39078 | Mineralocorticoid receptor                            | MCR_HUMAN   |
| 2.846 | 0.9488 | 1.37653 | Mitogen-activated protein kinase 1                    | MK01_HUMAN  |
| 2.878 | 0.5757 | 1.35538 | Neutrophil collagenase                                | MMP8_HUMAN  |
| 2.917 | 0.5833 | 1.3115  | Vascular endothelial growth factor receptor 2         | P35968      |
| 2.894 | 0.7236 | 1.30816 | Transthyretin                                         | TTHY_HUMAN  |
| 2.831 | 0.9435 | 1.26344 | Mitogen-activated protein kinase 8                    | MK08_HUMAN  |
| 2.987 | 0.4979 | 1.25292 | Receptor tyrosine-protein kinase erbB-4               | ERBB4_HUMAN |
| 2.84  | 0.71   | 1.23583 | Sex hormone-binding globulin                          | SHBG_HUMAN  |
| 2.838 | 0.7096 | 1.22644 | Peroxisome proliferator-activated receptor delta      | Q03181      |
| 2.8   | 0.7001 | 1.19084 | Cathepsin B                                           | CATB_HUMAN  |
| 2.852 | 0.5703 | 1.17052 | Cell division protein kinase 6                        | CDK6_HUMAN  |
| 2.813 | 0.5627 | 1.15861 | Cathepsin K                                           | CATK_HUMAN  |
| 2.85  | 0.7125 | 1.15779 | Peroxisome proliferator-activated receptor gamma      | PPARG_HUMAN |
| 2.8   | 0.9334 | 1.14412 | Estrogen receptor                                     | ESR1_HUMAN  |
| 2.813 | 0.5627 | 1.13621 | cAMP-dependent protein kinase catalytic subunit alpha | P00517      |
| 2.78  | 0.9266 | 1.11937 | Complement factor B                                   | CFAB_HUMAN  |
| 2.857 | 0.4761 | 1.11783 | Coagulation factor X                                  | FA10_HUMAN  |
| 2.795 | 0.6987 | 1.08911 | Angiogenin                                            | ANGI_HUMAN  |
| 2.834 | 0.4724 | 1.08678 | Alpha-amylase 1                                       | P04745      |
| 2.867 | 0.7168 | 1.07043 | Proto-oncogene tyrosine-protein                       | SRC_HUMAN   |

|     |       |        |          |                                                               |             |
|-----|-------|--------|----------|---------------------------------------------------------------|-------------|
|     |       |        |          | kinase Src                                                    | AN          |
|     | 2.956 | 0.4223 | 1.0451   | Matrix metalloproteinase-9                                    | MMP9_HUMAN  |
|     | 2.885 | 0.3606 | 1.02069  | Vitamin D3 receptor                                           | VDR_HUMAN   |
|     | 2.915 | 0.265  | 1.00576  | FK506-binding protein 3                                       | FKBP3_HUMAN |
|     | 2.832 | 0.5663 | 0.985134 | Hepatocyte growth factor receptor                             | P08581      |
|     | 2.822 | 0.3136 | 0.96644  | Pancreatic alpha-amylase                                      | AMYP_HUMAN  |
|     | 2.888 | 0.5776 | 0.951895 | Serine/threonine-protein kinase Chk1                          | CHK1_HUMAN  |
|     | 2.82  | 0.564  | 0.947982 | Aldo-keto reductase family 1 member C3                        | AK1C3_HUMAN |
|     | 2.877 | 0.3596 | 0.947498 | Signal transducer and activator of transcription 1-alpha/beta | STAT1_HUMAN |
|     | 2.931 | 0.3663 | 0.934186 | Cell division protein kinase 7                                | P50613      |
|     | 2.75  | 0.6876 | 0.892215 | Dipeptidyl peptidase 4                                        | DPP4_HUMAN  |
|     | 2.777 | 0.5553 | 0.888981 | Phenylalanine-4-hydroxylase                                   | PH4H_HUMAN  |
|     | 2.744 | 0.6861 | 0.873378 | Androgen receptor                                             | ANDR_HUMAN  |
|     | 2.786 | 0.6966 | 0.851587 | ADAM 17                                                       | ADA17_HUMAN |
|     | 2.978 | 0.4254 | 0.83174  | S-methyl-5-thioadenosine phosphorylase                        | Q13126      |
|     | 2.719 | 0.6797 | 0.829469 | Complement factor D                                           | CFAD_HUMAN  |
|     | 3.629 | 0.3629 | 0.824824 | Neprilysin                                                    | NEP_HUMAN   |
|     | 2.814 | 0.5628 | 0.800302 | Corticosteroid 11-beta-dehydrogenase isozyme 1                | P28845      |
| LAN | 4.542 | 0.9085 | 3.29745  | Aldo-keto reductase family 1 member C1                        | Q04828      |
|     | 4.937 | 0.7053 | 3.04636  | Lanosterol synthase                                           | ERG7_HUMAN  |
|     | 4.431 | 0.6329 | 2.589    | Renin                                                         | RENI_HUMAN  |
|     | 4.641 | 0.663  | 2.51593  | Cytochrome P450 2C8                                           | CP2C8_HUMAN |



|       |        |         |                                                          |                 |
|-------|--------|---------|----------------------------------------------------------|-----------------|
|       |        |         |                                                          | MAN             |
| 4.471 | 0.7451 | 2.35577 | E3 ubiquitin-protein ligase<br>Mdm2                      | MDM2_HU<br>MAN  |
| 4.455 | 0.8911 | 2.34343 | SEC14-like protein 2                                     | O76054          |
| 3.857 | 0.9644 | 2.30149 | Nuclear receptor ROR-alpha                               | RORA_HU<br>MAN  |
| 5.975 | 0.7469 | 2.2942  | Retinol-binding protein 4                                | RET4_HU<br>MAN  |
| 3.905 | 0.6509 | 2.21675 | Ganglioside GM2 activator                                | P17900          |
| 3.872 | 0.7745 | 2.04263 | cAMP-dependent protein kinase<br>catalytic subunit alpha | P00517          |
| 4.409 | 0.5511 | 1.945   | Retinoic acid receptor gamma                             | RARG_HU<br>MAN  |
| 3.886 | 0.7771 | 1.94049 | Bile acid receptor                                       | NR1H4_HU<br>MAN |
| 4.225 | 0.7042 | 1.90163 | Trafficking protein particle<br>complex subunit 3        | O43617          |
| 4.462 | 0.5578 | 1.84738 | Ferrochelatase, mitochondrial                            | P22830          |
| 4.256 | 0.532  | 1.79378 | Caspase-3                                                | CASP3_HU<br>MAN |
| 3.9   | 0.9751 | 1.62199 | Vitamin D-binding protein                                | VTDB_HU<br>MAN  |
| 4.692 | 0.5864 | 1.61792 | Glucocorticoid receptor                                  | GCR_HUM<br>AN   |
| 3.834 | 0.7667 | 1.61295 | Prothrombin                                              | THRB_HU<br>MAN  |
| 4.756 | 0.5945 | 1.5992  | Tyrosine-protein phosphatase<br>non-receptor type 1      | PTN1_HU<br>MAN  |
| 3.846 | 0.7691 | 1.55203 | Tyrosine-protein phosphatase<br>non-receptor type 11     | PTN11_HU<br>MAN |
| 3.902 | 0.7805 | 1.55034 | Corticosteroid 11-beta-<br>dehydrogenase isozyme 1       | DH11_HUM<br>AN  |
| 3.946 | 0.4933 | 1.5182  | Proto-oncogene tyrosine-protein<br>kinase ABL1           | P00519          |
| 3.845 | 0.5493 | 1.47151 | 72 kDa type IV collagenase                               | MMP2_HU<br>MAN  |
| 3.794 | 0.7587 | 1.46911 | Calmodulin                                               | CALM_HU<br>MAN  |
| 3.776 | 0.7552 | 1.44311 | Estradiol 17-beta-dehydrogenase<br>1                     | P14061          |
| 4.122 | 0.687  | 1.42964 | Alcohol dehydrogenase class-3                            | ADHX_HU         |

|       |        |         |                                                            |             |
|-------|--------|---------|------------------------------------------------------------|-------------|
|       |        |         |                                                            | MAN         |
| 3.793 | 0.7586 | 1.40314 | Mineralocorticoid receptor                                 | MCR_HUMAN   |
| 4.287 | 0.6124 | 1.39987 | Sulfotransferase family cytosolic 2B member 1              | O00204      |
| 3.891 | 0.6484 | 1.35879 | Glutathione S-transferase A1                               | P08263      |
| 3.756 | 0.5366 | 1.34954 | Serine/threonine-protein kinase 6                          | O14965      |
| 3.768 | 0.6279 | 1.34277 | Nuclear receptor subfamily 1 group I member 3              | NR1I3_HUMAN |
| 3.529 | 0.7058 | 1.33672 | Steroid hormone receptor ERR1                              | P11474      |
| 4.103 | 0.5862 | 1.33625 | Hepatocyte nuclear factor 4-gamma                          | Q14541      |
| 3.665 | 0.7331 | 1.33441 | Alpha-tocopherol transfer protein                          | P49638      |
| 3.863 | 0.6438 | 1.33124 | Hepatocyte growth factor receptor                          | MET_HUMAN   |
| 3.693 | 0.6154 | 1.32902 | Receptor tyrosine-protein kinase erbB-4                    | ERBB4_HUMAN |
| 3.551 | 0.5919 | 1.32498 | Retinoic acid receptor RXR-alpha                           | RXRA_HUMAN  |
| 4.207 | 0.601  | 1.32374 | Gastrotropin                                               | FABP6_HUMAN |
| 3.959 | 0.6599 | 1.31396 | Glutathione-requiring prostaglandin D synthase             | PTGD2_HUMAN |
| 4.726 | 0.5251 | 1.30582 | Dual specificity mitogen-activated protein kinase kinase 1 | MP2K1_HUMAN |
| 3.494 | 0.6988 | 1.30003 | Glutathione S-transferase P                                | GSTP1_HUMAN |
| 3.973 | 0.6621 | 1.29491 | Sex hormone-binding globulin                               | SHBG_HUMAN  |
| 4.215 | 0.3243 | 1.27793 | Endothelial protein C receptor                             | EPCR_HUMAN  |
| 4.764 | 0.4764 | 1.26368 | Retinoic acid receptor RXR-beta                            | RXRB_HUMAN  |
| 4.236 | 0.6052 | 1.18511 | Fatty acid-binding protein, brain                          | FABP7_HUMAN |
| 3.498 | 0.2691 | 1.17436 | Amine oxidase [flavin-containing] A                        | AOFA_HUMAN  |
| 4.082 | 0.5832 | 1.16241 | Mitogen-activated protein kinase 10                        | MK10_HUMAN  |
| 3.939 | 0.4376 | 1.16212 | Growth factor receptor-bound protein 2                     | GRB2_HUMAN  |

|                             |       |        |          |                                                 |             |
|-----------------------------|-------|--------|----------|-------------------------------------------------|-------------|
|                             | 3.503 | 0.7006 | 1.1391   | Poly [ADP-ribose] polymerase 1                  | P09874      |
|                             | 4.329 | 0.481  | 1.13614  | Retinoic acid receptor beta                     | RARB_HUMAN  |
|                             | 3.645 | 0.6075 | 1.13206  | Oxysterols receptor LXR-alpha                   | NR1H3_HUMAN |
|                             | 3.543 | 0.3936 | 1.12605  | Bcl-2-like protein 1                            | Q07817      |
|                             | 3.474 | 0.579  | 1.10861  | Insulin-like growth factor IA                   | P01343      |
|                             | 3.681 | 0.5258 | 1.10614  | Interleukin-2                                   | IL2_HUMAN   |
|                             | 3.421 | 0.6843 | 1.05133  | Histone deacetylase 8                           | Q9BY41      |
|                             | 3.529 | 0.5881 | 1.03374  | Flavin reductase                                | P30043      |
|                             | 3.613 | 0.5162 | 1.02152  | Neutrophil gelatinase-associated lipocalin      | NGAL_HUMAN  |
|                             | 3.462 | 0.577  | 1.01223  | Alpha-1-antitrypsin                             | A1AT_HUMAN  |
|                             | 4.213 | 0.383  | 0.997048 | Phosphatidylcholine transfer protein            | Q9UKL6      |
|                             | 3.341 | 0.4772 | 0.929073 | 3-hydroxy-3-methylglutaryl-coenzyme A reductase | HMDH_HUMAN  |
|                             | 3.588 | 0.598  | 0.860887 | cAMP-specific 3,5-cyclic phosphodiesterase 4D   | PDE4D_HUMAN |
|                             | 3.743 | 0.7485 | 0.854952 | Bile salt sulfotransferase                      | Q06520      |
|                             | 3.552 | 0.592  | 0.838784 | Oxysterols receptor LXR-beta                    | NR1H2_HUMAN |
|                             | 3.547 | 0.7095 | 0.835192 | Wiskott-Aldrich syndrome protein                | WASP_HUMAN  |
|                             | 3.467 | 0.4953 | 0.832579 | Protein S100-A9                                 | S10A9_HUMAN |
|                             | 3.346 | 0.6692 | 0.805078 | Vascular endothelial growth factor receptor 2   | P35968      |
| <b>lanost-8-en-3beta-ol</b> | 4.543 | 0.9085 | 3.40766  | Aldo-keto reductase family 1 member C1          | Q04828      |
|                             | 4.931 | 0.7044 | 3.143    | Lanosterol synthase                             | ERG7_HUMAN  |
|                             | 4.69  | 0.6699 | 2.70006  | Cytochrome P450 2C8                             | CP2C8_HUMAN |
|                             | 3.927 | 0.9816 | 2.56554  | Nuclear receptor ROR-alpha                      | RORA_HUMAN  |
|                             | 4.454 | 0.8909 | 2.43385  | SEC14-like protein 2                            | O76054      |
|                             | 4.298 | 0.614  | 2.41714  | Renin                                           | RENI_HUMAN  |

|       |        |         |                                                           |             |
|-------|--------|---------|-----------------------------------------------------------|-------------|
| 4.328 | 0.7214 | 2.17376 | E3 ubiquitin-protein ligase<br>Mdm2                       | MDM2_HUMAN  |
| 4.16  | 0.6933 | 2.11162 | Retinol-binding protein 4                                 | RET4_HUMAN  |
| 3.787 | 0.6312 | 2.02914 | Ganglioside GM2 activator                                 | P17900      |
| 4.462 | 0.5578 | 1.92402 | Ferrochelatase, mitochondrial                             | P22830      |
| 4.184 | 0.6974 | 1.90784 | Trafficking protein particle<br>complex subunit 3         | O43617      |
| 3.813 | 0.7626 | 1.858   | Bile acid receptor                                        | NR1H4_HUMAN |
| 4.215 | 0.5269 | 1.80141 | Caspase-3                                                 | CASP3_HUMAN |
| 4.278 | 0.713  | 1.78657 | Alcohol dehydrogenase class-3                             | ADHX_HUMAN  |
| 3.939 | 0.7878 | 1.70702 | Corticosteroid 11-beta-<br>dehydrogenase isozyme 1        | DH11_HUMAN  |
| 3.835 | 0.4261 | 1.70594 | Phosphatidylinositol 3-kinase<br>regulatory subunit alpha | P85A_HUMAN  |
| 3.895 | 0.9737 | 1.69753 | Vitamin D-binding protein                                 | VTDB_HUMAN  |
| 4.763 | 0.5954 | 1.68122 | Tyrosine-protein phosphatase<br>non-receptor type 1       | PTN1_HUMAN  |
| 4.353 | 0.6219 | 1.67105 | Mitogen-activated protein kinase<br>10                    | MK10_HUMAN  |
| 3.906 | 0.558  | 1.64506 | 72 kDa type IV collagenase                                | MMP2_HUMAN  |
| 3.885 | 0.555  | 1.64166 | Macrophage metalloelastase                                | MMP12_HUMAN |
| 3.978 | 0.4973 | 1.64087 | Proto-oncogene tyrosine-protein<br>kinase ABL1            | P00519      |
| 4.644 | 0.5805 | 1.62722 | Glucocorticoid receptor                                   | GCR_HUMAN   |
| 3.616 | 0.7231 | 1.58102 | Steroid hormone receptor ERR1                             | P11474      |
| 3.706 | 0.6176 | 1.52015 | Flavin reductase                                          | P30043      |
| 3.776 | 0.7552 | 1.51232 | Estradiol 17-beta-dehydrogenase<br>1                      | P14061      |
| 3.568 | 0.7137 | 1.48583 | Histone deacetylase 8                                     | Q9BY41      |
| 3.531 | 0.8828 | 1.46935 | Mitogen-activated protein kinase<br>14                    | Q16539      |
| 3.886 | 0.6477 | 1.42127 | Glutathione S-transferase A1                              | P08263      |
| 3.759 | 0.7518 | 1.40444 | Mineralocorticoid receptor                                | MCR_HUMAN   |

|       |        |         |                                                            |              |
|-------|--------|---------|------------------------------------------------------------|--------------|
|       |        |         |                                                            | AN           |
| 3.733 | 0.6221 | 1.39217 | Oxysterols receptor LXR-alpha                              | NR1H3_HUMAN  |
| 4.207 | 0.601  | 1.39071 | Gastrotropin                                               | FABP6_HUMAN  |
| 4.229 | 0.6042 | 1.38198 | Sulfotransferase family cytosolic 2B member 1              | O00204       |
| 4.792 | 0.4792 | 1.3612  | Retinoic acid receptor RXR-beta                            | RXRB_HUMAN   |
| 3.734 | 0.6223 | 1.3431  | Nuclear receptor subfamily 1 group I member 3              | NR1I3_HUMAN  |
| 3.476 | 0.6953 | 1.32548 | Glutathione S-transferase P                                | GSTP1_HUMAN  |
| 3.621 | 0.7243 | 1.30905 | Alpha-tocopherol transfer protein                          | P49638       |
| 3.699 | 0.5284 | 1.28812 | Neutrophil gelatinase-associated lipocalin                 | NGAL_HUMAN   |
| 3.804 | 0.6339 | 1.28541 | Hepatocyte growth factor receptor                          | MET_HUMAN    |
| 3.921 | 0.6534 | 1.27093 | Sex hormone-binding globulin                               | SHBG_HUMAN   |
| 4.35  | 0.3955 | 1.25781 | Phosphatidylcholine transfer protein                       | Q9UKL6       |
| 4.62  | 0.5133 | 1.24555 | Dual specificity mitogen-activated protein kinase kinase 1 | MP2K1_HUMAN  |
| 3.513 | 0.7027 | 1.22155 | Poly [ADP-ribose] polymerase 1                             | P09874       |
| 3.646 | 0.7293 | 1.21588 | Calmodulin                                                 | CALM_HUMAN   |
| 4.13  | 0.3177 | 1.21311 | Endothelial protein C receptor                             | EPCR_HUMAN   |
| 3.696 | 0.528  | 1.19513 | Interleukin-2                                              | IL2_HUMAN    |
| 4.303 | 0.4781 | 1.16391 | Retinoic acid receptor beta                                | RARB_HUMAN   |
| 3.821 | 0.6368 | 1.14335 | Glutathione-requiring prostaglandin D synthase             | PTGD2_HUMAN  |
| 3.616 | 0.7232 | 1.11837 | Tyrosine-protein phosphatase non-receptor type 11          | PTN11_HUMAN  |
| 3.919 | 0.4898 | 1.09609 | Retinoic acid receptor alpha                               | RARA_HUMAN   |
| 3.998 | 0.4997 | 1.09019 | Peptidyl-prolyl cis-trans isomerase FKBP1A                 | FKBP1A_HUMAN |

|                                         |       |        |          |                                                                  |             |
|-----------------------------------------|-------|--------|----------|------------------------------------------------------------------|-------------|
|                                         | 3.805 | 0.7611 | 1.03234  | Bile salt sulfotransferase                                       | Q06520      |
|                                         | 3.515 | 0.5021 | 1.00254  | Protein S100-A9                                                  | S10A9_HUMAN |
|                                         | 3.537 | 0.5053 | 1.00164  | Serine/threonine-protein kinase 6                                | O14965      |
|                                         | 3.337 | 0.4767 | 0.97617  | 3-hydroxy-3-methylglutaryl-coenzyme A reductase                  | HMDH_HUMAN  |
|                                         | 4.08  | 0.51   | 0.961189 | Histamine N-methyltransferase                                    | P50135      |
|                                         | 3.377 | 0.6753 | 0.927537 | Vascular endothelial growth factor receptor 2                    | P35968      |
|                                         | 4.01  | 0.5728 | 0.90684  | Fatty acid-binding protein, brain                                | FABP7_HUMAN |
|                                         | 3.552 | 0.592  | 0.899387 | Oxysterols receptor LXR-beta                                     | NR1H2_HUMAN |
|                                         | 3.356 | 0.5593 | 0.853989 | Alpha-1-antitrypsin                                              | A1AT_HUMAN  |
| <b>lanosta-8,24-dien-3-ol,3-acetate</b> | 3.752 | 0.4169 | 2.96609  | Serine/threonine-protein phosphatase PP1-gamma catalytic subunit | P36873      |
|                                         | 3.834 | 0.4793 | 2.20822  | Fatty acid-binding protein, brain                                | FABP7_HUMAN |
|                                         | 3.352 | 0.419  | 2.08702  | Proto-oncogene tyrosine-protein kinase ABL1                      | P00519      |
|                                         | 3.608 | 0.2775 | 1.93798  | Endothelial protein C receptor                                   | EPCR_HUMAN  |
|                                         | 3.22  | 0.5366 | 1.86492  | Nuclear receptor subfamily 1 group I member 3                    | NR1I3_HUMAN |
|                                         | 2.921 | 0.9736 | 1.80989  | Proto-oncogene serine/threonine-protein kinase Pim-1             | P11309      |
|                                         | 3.642 | 0.4553 | 1.78216  | Histamine N-methyltransferase                                    | P50135      |
|                                         | 2.997 | 0.5995 | 1.71758  | Glutathione S-transferase P                                      | GSTP1_HUMAN |
|                                         | 3.256 | 0.5427 | 1.70014  | Tyrosine-protein kinase SYK                                      | KSYK_HUMAN  |
|                                         | 3.191 | 0.5318 | 1.6899   | Integrin alpha-L                                                 | ITAL_HUMAN  |
|                                         | 2.92  | 0.9735 | 1.6799   | Apolipoprotein A-II                                              | APOA2_HUMAN |
|                                         | 3.327 | 0.4159 | 1.67404  | Caspase-3                                                        | CASP3_HUMAN |
|                                         | 3.844 | 0.3844 | 1.63642  | Nuclear receptor subfamily 1 group I member 2                    | NR1I2_HUMAN |

|  |       |        |         |                                                                      |             |
|--|-------|--------|---------|----------------------------------------------------------------------|-------------|
|  | 2.953 | 0.7382 | 1.62648 | Mitogen-activated protein kinase 8                                   | MK08_HUMAN  |
|  | 3.12  | 0.4458 | 1.58113 | Proactivator polypeptide                                             | P07602      |
|  | 3.177 | 0.5296 | 1.57933 | Dipeptidyl peptidase 4                                               | DPP4_HUMAN  |
|  | 3.324 | 0.4748 | 1.47485 | Hepatocyte nuclear factor 4-gamma                                    | Q14541      |
|  | 3.129 | 0.3912 | 1.43595 | Vitamin D3 receptor                                                  | VDR_HUMAN   |
|  | 2.966 | 0.4943 | 1.42968 | Insulin-like growth factor IA                                        | P01343      |
|  | 3.348 | 0.4783 | 1.38869 | Mitogen-activated protein kinase 10                                  | MK10_HUMAN  |
|  | 3.07  | 0.4385 | 1.35599 | 72 kDa type IV collagenase                                           | MMP2_HUMAN  |
|  | 3.23  | 0.3589 | 1.34077 | Growth factor receptor-bound protein 2                               | GRB2_HUMAN  |
|  | 3.152 | 0.5254 | 1.33132 | [Pyruvate dehydrogenase [lipoamide]] kinase isozyme 2, mitochondrial | PDK2_HUMAN  |
|  | 2.87  | 0.7175 | 1.28288 | Cell division protein kinase 2                                       | P24941      |
|  | 3.226 | 0.4033 | 1.28012 | Glutathione S-transferase A1                                         | P08263      |
|  | 3.354 | 0.4791 | 1.2519  | Fatty acid-binding protein, heart                                    | FABPH_HUMAN |
|  | 2.778 | 0.926  | 1.24505 | Carbonic anhydrase 2                                                 | CAH2_HUMAN  |
|  | 2.951 | 0.4918 | 1.2305  | Aldo-keto reductase family 1 member C3                               | AK1C3_HUMAN |
|  | 2.761 | 0.9202 | 1.14502 | Amine oxidase [flavin-containing] B                                  | AOFB_HUMAN  |
|  | 3.572 | 0.3969 | 1.13821 | Dual specificity mitogen-activated protein kinase kinase 1           | MP2K1_HUMAN |
|  | 2.98  | 0.596  | 1.1374  | Prothrombin                                                          | THRB_HUMAN  |
|  | 2.753 | 0.9176 | 1.13381 | Thyroid hormone receptor beta                                        | P10828      |
|  | 2.908 | 0.4846 | 1.07251 | Poly [ADP-ribose] polymerase 1                                       | P09874      |
|  | 2.846 | 0.7115 | 1.05908 | Annexin A5                                                           | ANXA5_HUMAN |
|  | 2.835 | 0.567  | 1.04644 | NONE                                                                 | NONE        |
|  | 3.042 | 0.507  | 1.03514 | Androgen receptor                                                    | ANDR_HUMAN  |
|  | 2.95  | 0.5901 | 1.01651 | Calmodulin                                                           | CALM_HUMAN  |

|       |        |          |                                                        |             |
|-------|--------|----------|--------------------------------------------------------|-------------|
|       |        |          |                                                        | MAN         |
| 2.973 | 0.5947 | 0.998166 | Wiskott-Aldrich syndrome protein                       | WASP_HUMAN  |
| 3.537 | 0.3537 | 0.995722 | Retinoic acid receptor RXR-beta                        | RXR_B_HUMAN |
| 2.925 | 0.3251 | 0.988087 | Phosphatidylinositol 3-kinase regulatory subunit alpha | P85A_HUMAN  |
| 2.869 | 0.5737 | 0.985361 | Bile acid receptor                                     | NR1H4_HUMAN |
| 2.739 | 0.6848 | 0.982272 | Troponin C, slow skeletal and cardiac muscles          | P63316      |
| 2.835 | 0.5669 | 0.976191 | cAMP-dependent protein kinase catalytic subunit alpha  | P00517      |
| 2.82  | 0.7051 | 0.964711 | Proto-oncogene tyrosine-protein kinase Src             | SRC_HUMAN   |
| 2.817 | 0.4695 | 0.937549 | Histo-blood group ABO system transferase               | P16442      |
| 2.864 | 0.5727 | 0.92392  | Serine/threonine-protein kinase Chk1                   | CHK1_HUMAN  |
| 2.892 | 0.4819 | 0.914901 | Peroxisome proliferator-activated receptor alpha       | PPARA_HUMAN |
| 2.928 | 0.488  | 0.884293 | Tyrosine-protein kinase JAK3                           | JAK3_HUMAN  |
| 2.681 | 0.8937 | 0.876517 | Kinesin-like protein KIF11                             | KIF11_HUMAN |
| 3.146 | 0.4494 | 0.867844 | Gastrotropin                                           | FABP6_HUMAN |
| 3.578 | 0.5112 | 0.866549 | 3-phosphoinositide-dependent protein kinase 1          | PDPK1_HUMAN |
| 2.774 | 0.3963 | 0.849004 | 3-hydroxy-3-methylglutaryl-coenzyme A reductase        | HMDH_HUMAN  |
| 2.873 | 0.4789 | 0.842933 | Glycogen synthase kinase-3 beta                        | GSK3B_HUMAN |
| 3.275 | 0.4093 | 0.840451 | Glucocorticoid receptor                                | GCR_HUMAN   |
| 2.651 | 0.8836 | 0.812997 | Serum albumin                                          | ALBU_HUMAN  |
| 2.899 | 0.5797 | 0.807841 | Tyrosine-protein phosphatase non-receptor type 11      | PTN11_HUMAN |
| 2.958 | 0.4226 | 0.802951 | MAP kinase-activated protein kinase 2                  | P49137      |



|                  |        |          |                                                    |                                                                               |             |
|------------------|--------|----------|----------------------------------------------------|-------------------------------------------------------------------------------|-------------|
| <b>matrine</b>   | 3.552  | 0.7104   | 4.15263                                            | Estradiol 17-beta-dehydrogenase<br>1                                          | P14061      |
|                  | 2.968  | 0.4947   | 2.31826                                            | Prothrombin                                                                   | THRB_HUMAN  |
|                  | 2.899  | 0.7248   | 1.80421                                            | Protein<br>farnesyltransferase/geranylgeranyltransferase type-1 subunit alpha | FNTA_HUMAN  |
|                  | 2.894  | 0.7236   | 1.78874                                            | Estrogen-related receptor gamma                                               | P62508      |
|                  | 2.937  | 0.5875   | 1.60863                                            | Alpha-tocopherol transfer protein                                             | P49638      |
|                  | 2.995  | 0.4278   | 1.50438                                            | Retinoic acid receptor RXR-<br>alpha                                          | RXRA_HUMAN  |
|                  | 2.997  | 0.4282   | 1.42576                                            | Retinoic acid receptor gamma                                                  | RARG_HUMAN  |
|                  | 2.802  | 0.5604   | 1.36842                                            | Carbonic anhydrase 2                                                          | CAH2_HUMAN  |
|                  | 2.879  | 0.3599   | 1.33379                                            | Heat shock protein HSP 90-beta                                                | P08238      |
|                  | 2.901  | 0.4144   | 1.33333                                            | 3-phosphoinositide-dependent<br>protein kinase 1                              | PDPK1_HUMAN |
|                  | 2.852  | 0.4754   | 1.2888                                             | Thyroid hormone receptor beta                                                 | P10828      |
|                  | 2.842  | 0.5683   | 1.26878                                            | Mitogen-activated protein kinase<br>14                                        | Q16539      |
|                  | 2.882  | 0.4804   | 1.17495                                            | Nuclear receptor subfamily 1<br>group 1 member 3                              | NR1I3_HUMAN |
|                  | 2.897  | 0.4139   | 1.15201                                            | Peroxisome proliferator-activated<br>receptor gamma                           | PPARG_HUMAN |
|                  | 2.877  | 0.3596   | 1.07151                                            | Vitamin D3 receptor                                                           | VDR_HUMAN   |
|                  | 2.674  | 0.6686   | 1.03163                                            | Dipeptidyl peptidase 4                                                        | DPP4_HUMAN  |
|                  | 2.773  | 0.3962   | 1.01161                                            | Baculoviral IAP repeat-<br>containing protein 4                               | XIAP_HUMAN  |
|                  | 2.929  | 0.4882   | 0.975905                                           | Adenosine kinase                                                              | P55263      |
|                  | 2.687  | 0.5375   | 0.966677                                           | Neutrophil collagenase                                                        | MMP8_HUMAN  |
|                  | 2.815  | 0.4692   | 0.931216                                           | Oxysterols receptor LXR-alpha                                                 | NR1H3_HUMAN |
| 2.779            | 0.4632 | 0.824458 | Corticosteroid 11-beta-<br>dehydrogenase isozyme 1 | DH11_HUMAN                                                                    |             |
| <b>sophranol</b> | 2.88   | 0.2619   | 2.01287                                            | Histone-lysine N-<br>methyltransferase SETD8                                  | SETD8_HUMAN |
|                  | 3.083  | 0.3854   | 1.94076                                            | Stromelysin-1                                                                 | MMP3_HUMAN  |

|                 |       |        |          |                                                          |                 |
|-----------------|-------|--------|----------|----------------------------------------------------------|-----------------|
|                 |       |        |          |                                                          | MAN             |
|                 | 2.815 | 0.7037 | 1.86202  | Mitogen-activated protein kinase<br>8                    | MK08_HU<br>MAN  |
|                 | 2.803 | 0.5606 | 1.73391  | Neutrophil collagenase                                   | MMP8_HU<br>MAN  |
|                 | 2.769 | 0.5538 | 1.65756  | Heat shock protein HSP 90-alpha                          | HS90A_HU<br>MAN |
|                 | 2.81  | 0.5621 | 1.54379  | Phenylalanine-4-hydroxylase                              | PH4H_HU<br>MAN  |
|                 | 2.944 | 0.4205 | 1.43014  | cAMP-specific 3,5-cyclic<br>phosphodiesterase 4B         | PDE4B_HU<br>MAN |
|                 | 2.965 | 0.4235 | 1.36631  | Tyrosine-protein phosphatase<br>non-receptor type 1      | PTN1_HU<br>MAN  |
|                 | 2.722 | 0.6806 | 1.34382  | Dipeptidyl peptidase 4                                   | DPP4_HUM<br>AN  |
|                 | 2.786 | 0.398  | 1.30371  | Proto-oncogene serine/threonine-<br>protein kinase Pim-1 | PIM1_HUM<br>AN  |
|                 | 2.804 | 0.5609 | 1.26797  | Cell division protein kinase 2                           | P24941          |
|                 | 2.828 | 0.3535 | 1.17544  | Bile acid receptor                                       | Q96R11          |
|                 | 2.974 | 0.4249 | 1.16084  | Tyrosine-protein kinase HCK                              | HCK_HUM<br>AN   |
|                 | 2.752 | 0.3931 | 1.08608  | Corticosteroid 11-beta-<br>dehydrogenase isozyme 1       | DH11_HUM<br>AN  |
|                 | 2.771 | 0.4618 | 1.03532  | Cytochrome P450 2C9                                      | CP2C9_HU<br>MAN |
|                 | 2.69  | 0.5381 | 0.896974 | Fibroblast growth factor receptor<br>2                   | P21802          |
|                 | 2.563 | 0.6409 | 0.826476 | NONE                                                     | NONE            |
|                 | 2.83  | 0.3144 | 0.803871 | Peptidyl-prolyl cis-trans<br>isomerase FKBP1A            | FKB1A_HU<br>MAN |
|                 | 4.632 | 0.9263 | 3.19019  | SEC14-like protein 2                                     | O76054          |
|                 | 4.584 | 0.764  | 3.03863  | Trafficking protein particle<br>complex subunit 3        | O43617          |
|                 | 4.171 | 0.5958 | 2.32681  | Interleukin-2                                            | IL2_HUMA<br>N   |
|                 | 4     | 0.8    | 2.17117  | Tyrosine-protein phosphatase<br>non-receptor type 11     | PTN11_HU<br>MAN |
|                 | 4.229 | 0.6041 | 2.14019  | Lanosterol synthase                                      | ERG7_HU<br>MAN  |
|                 | 3.91  | 0.6516 | 2.07653  | Peroxisome proliferator-activated<br>receptor alpha      | PPARA_HU<br>MAN |
| <b>Mandenol</b> |       |        |          |                                                          |                 |

|  |       |        |         |                                                |             |
|--|-------|--------|---------|------------------------------------------------|-------------|
|  | 4.462 | 0.3432 | 2.04204 | Endothelial protein C receptor                 | EPCR_HUMAN  |
|  | 3.943 | 0.9857 | 1.98574 | Vitamin D-binding protein                      | VTDB_HUMAN  |
|  | 5.139 | 0.6424 | 1.86869 | Retinol-binding protein 4                      | RET4_HUMAN  |
|  | 4.098 | 0.5854 | 1.83419 | Cytochrome P450 2C8                            | CP2C8_HUMAN |
|  | 3.788 | 0.3443 | 1.80974 | FK506-binding protein 3                        | FKBP3_HUMAN |
|  | 3.693 | 0.6155 | 1.8092  | cGMP-specific 3,5-cyclic phosphodiesterase     | PDE5A_HUMAN |
|  | 3.83  | 0.766  | 1.73756 | Calmodulin                                     | CALM_HUMAN  |
|  | 4.163 | 0.5947 | 1.72257 | Hepatocyte nuclear factor 4-gamma              | Q14541      |
|  | 4.025 | 0.6709 | 1.65188 | Glutathione-requiring prostaglandin D synthase | PTGD2_HUMAN |
|  | 3.637 | 0.7273 | 1.63867 | Steroid hormone receptor ERR1                  | P11474      |
|  | 3.963 | 0.6604 | 1.61461 | E3 ubiquitin-protein ligase Mdm2               | MDM2_HUMAN  |
|  | 3.843 | 0.6406 | 1.54706 | Dipeptidyl peptidase 4                         | DPP4_HUMAN  |
|  | 4.694 | 0.5216 | 1.51528 | Cellular retinoic acid-binding protein 2       | P29373      |
|  | 3.694 | 0.7388 | 1.50112 | Alpha-tocopherol transfer protein              | P49638      |
|  | 3.555 | 0.5926 | 1.46256 | Ganglioside GM2 activator                      | P17900      |
|  | 3.624 | 0.7248 | 1.43812 | Epoxide hydrolase 2                            | HYES_HUMAN  |
|  | 3.658 | 0.6097 | 1.43272 | Flavin reductase                               | P30043      |
|  | 4.322 | 0.4803 | 1.4024  | Retinoic acid receptor beta                    | RARB_HUMAN  |
|  | 3.975 | 0.6625 | 1.38769 | Alcohol dehydrogenase class-3                  | ADHX_HUMAN  |
|  | 3.707 | 0.6179 | 1.38329 | Oxysterols receptor LXR-alpha                  | NR1H3_HUMAN |
|  | 4.18  | 0.5971 | 1.363   | Fatty acid-binding protein, brain              | FABP7_HUMAN |
|  | 3.766 | 0.6277 | 1.35101 | Tyrosine-protein kinase ITK/TSK                | Q08881      |
|  | 4     | 0.5715 | 1.34492 | Cytochrome P450 2C9                            | CP2C9_HUMAN |

|       |        |         |                                                                      |             |
|-------|--------|---------|----------------------------------------------------------------------|-------------|
|       |        |         |                                                                      | MAN         |
| 3.827 | 0.6378 | 1.33665 | [Pyruvate dehydrogenase [lipoamide]] kinase isozyme 2, mitochondrial | PDK2_HUMAN  |
| 3.389 | 0.8472 | 1.33148 | Macrophage migration inhibitory factor                               | MIF_HUMAN   |
| 3.708 | 0.5297 | 1.33005 | 72 kDa type IV collagenase                                           | MMP2_HUMAN  |
| 3.728 | 0.7456 | 1.31739 | Corticosteroid 11-beta-dehydrogenase isozyme 1                       | DH11_HUMAN  |
| 3.721 | 0.6201 | 1.30866 | Integrin alpha-L                                                     | ITAL_HUMAN  |
| 4.221 | 0.3837 | 1.26853 | Phosphatidylcholine transfer protein                                 | Q9UKL6      |
| 3.379 | 0.8446 | 1.23299 | Epidermal growth factor receptor                                     | EGFR_HUMAN  |
| 3.632 | 0.7264 | 1.21911 | Prothrombin                                                          | THRB_HUMAN  |
| 3.825 | 0.6375 | 1.21391 | Adenosine kinase                                                     | P55263      |
| 3.751 | 0.5358 | 1.21145 | Tyrosine-protein kinase ZAP-70                                       | ZAP70_HUMAN |
| 3.481 | 0.6962 | 1.19657 | Histone deacetylase 8                                                | Q9BY41      |
| 3.791 | 0.7581 | 1.19199 | Estradiol 17-beta-dehydrogenase 1                                    | P14061      |
| 3.652 | 0.6087 | 1.18319 | Tyrosine-protein kinase JAK3                                         | JAK3_HUMAN  |
| 3.913 | 0.4891 | 1.18204 | Ferrochelatase, mitochondrial                                        | P22830      |
| 3.794 | 0.5421 | 1.17022 | Protein kinase C theta type                                          | KPCT_HUMAN  |
| 4.355 | 0.4839 | 1.1275  | Dual specificity mitogen-activated protein kinase kinase 1           | MP2K1_HUMAN |
| 3.621 | 0.5173 | 1.12507 | Proactivator polypeptide                                             | P07602      |
| 3.693 | 0.5276 | 1.09857 | Retinoic acid receptor gamma                                         | RARG_HUMAN  |
| 3.498 | 0.583  | 1.08997 | Alpha-1-antitrypsin                                                  | A1AT_HUMAN  |
| 4.129 | 0.5162 | 1.08455 | Glucocorticoid receptor                                              | GCR_HUMAN   |
| 3.862 | 0.5516 | 1.05718 | Estrogen sulfotransferase                                            | ST1E1_HUMAN |
| 3.5   | 0.3889 | 1.03845 | Bcl-2-like protein 1                                                 | Q07817      |

|                                             |       |        |          |                                                           |             |
|---------------------------------------------|-------|--------|----------|-----------------------------------------------------------|-------------|
|                                             | 3.969 | 0.5671 | 1.02723  | Fatty acid-binding protein, heart                         | FABPH_HUMAN |
|                                             | 3.317 | 0.6633 | 0.99214  | Serine/threonine-protein kinase<br>PAK 7                  | PAK7_HUMAN  |
|                                             | 3.432 | 0.5721 | 0.981136 | Insulin-like growth factor IA                             | P01343      |
|                                             | 3.374 | 0.8436 | 0.975719 | Mitogen-activated protein kinase<br>14                    | Q16539      |
|                                             | 3.38  | 0.8451 | 0.919183 | ADAM 17                                                   | ADA17_HUMAN |
|                                             | 3.508 | 0.3898 | 0.91542  | Phosphatidylinositol 3-kinase<br>regulatory subunit alpha | P85A_HUMAN  |
|                                             | 3.499 | 0.4373 | 0.902622 | Glutamate carboxypeptidase 2                              | FOLH1_HUMAN |
|                                             | 3.428 | 0.6856 | 0.888958 | Bile acid receptor                                        | NR1H4_HUMAN |
|                                             | 3.463 | 0.4328 | 0.864115 | Vitamin D3 receptor                                       | VDR_HUMAN   |
|                                             | 3.926 | 0.6543 | 0.862154 | Phosphoenolpyruvate<br>carboxykinase, cytosolic [GTP]     | P35558      |
|                                             | 3.813 | 0.5447 | 0.83976  | Sulfotransferase family cytosolic<br>2B member 1          | O00204      |
|                                             | 3.445 | 0.4307 | 0.834454 | Heat shock protein HSP 90-beta                            | P08238      |
|                                             | 3.699 | 0.5285 | 0.818897 | Tyrosine-protein kinase HCK                               | HCK_HUMAN   |
| <b>(E,E)-1-ethyl octadeca-3,13-dienoate</b> | 4.818 | 0.6883 | 3.24485  | Cytochrome P450 2C8                                       | CP2C8_HUMAN |
|                                             | 4.157 | 0.6929 | 2.73545  | Flavin reductase                                          | P30043      |
|                                             | 4.411 | 0.7351 | 2.51873  | Trafficking protein particle<br>complex subunit 3         | O43617      |
|                                             | 4.464 | 0.6378 | 2.51782  | Lanosterol synthase                                       | ERG7_HUMAN  |
|                                             | 3.871 | 0.9677 | 2.30543  | Mitogen-activated protein kinase<br>14                    | Q16539      |
|                                             | 4.188 | 0.5983 | 2.27289  | 72 kDa type IV collagenase                                | MMP2_HUMAN  |
|                                             | 4.391 | 0.4879 | 2.06672  | Proto-oncogene tyrosine-protein<br>kinase ABL1            | P00519      |
|                                             | 3.801 | 0.9502 | 2.03595  | Collagenase 3                                             | MMP13_HUMAN |
|                                             | 4.138 | 0.8275 | 1.95689  | SEC14-like protein 2                                      | O76054      |
|                                             | 4.493 | 0.6419 | 1.93399  | Fatty acid-binding protein, heart                         | FABPH_HUMAN |

|       |        |         |                                                          |             |
|-------|--------|---------|----------------------------------------------------------|-------------|
|       |        |         |                                                          | MAN         |
| 3.812 | 0.953  | 1.83657 | ADAM 17                                                  | ADA17_HUMAN |
| 3.65  | 0.9124 | 1.8187  | Nuclear receptor ROR-alpha                               | RORA_HUMAN  |
| 3.672 | 0.7343 | 1.79951 | Serine/threonine-protein kinase<br>PAK 7                 | PAK7_HUMAN  |
| 4.235 | 0.605  | 1.76541 | Hepatocyte nuclear factor 4-<br>gamma                    | Q14541      |
| 3.682 | 0.6136 | 1.744   | Ganglioside GM2 activator                                | P17900      |
| 3.77  | 0.4189 | 1.70888 | Bcl-2-like protein 1                                     | Q07817      |
| 4.151 | 0.593  | 1.68503 | Thyroid hormone receptor alpha                           | P10827      |
| 4.547 | 0.5053 | 1.66472 | Retinoic acid receptor beta                              | RARB_HUMAN  |
| 3.683 | 0.7366 | 1.64709 | cAMP-dependent protein kinase<br>catalytic subunit alpha | P00517      |
| 4.485 | 0.4077 | 1.62366 | Phosphatidylcholine transfer<br>protein                  | Q9UUKL6     |
| 4.295 | 0.3304 | 1.61273 | Endothelial protein C receptor                           | EPCR_HUMAN  |
| 3.837 | 0.7674 | 1.56173 | Mineralocorticoid receptor                               | MCR_HUMAN   |
| 3.698 | 0.7397 | 1.56165 | Bile acid receptor                                       | NR1H4_HUMAN |
| 3.856 | 0.6426 | 1.55581 | Integrin alpha-L                                         | ITAL_HUMAN  |
| 3.807 | 0.7614 | 1.55302 | Tyrosine-protein phosphatase<br>non-receptor type 11     | PTN11_HUMAN |
| 3.785 | 0.7571 | 1.41512 | Wiskott-Aldrich syndrome<br>protein                      | WASP_HUMAN  |
| 3.628 | 0.7257 | 1.41142 | Poly [ADP-ribose] polymerase 1                           | P09874      |
| 3.901 | 0.7802 | 1.35136 | Estradiol 17-beta-dehydrogenase<br>1                     | P14061      |
| 3.529 | 0.7058 | 1.33203 | Heat shock protein HSP 90-alpha                          | HS90A_HUMAN |
| 3.746 | 0.9366 | 1.33085 | Vitamin D-binding protein                                | VTDB_HUMAN  |
| 3.613 | 0.6022 | 1.31138 | Alpha-1-antitrypsin                                      | A1AT_HUMAN  |
| 4.01  | 0.4455 | 1.29754 | Mast/stem cell growth factor<br>receptor                 | KIT_HUMAN   |

|  |       |        |          |                                                                      |              |
|--|-------|--------|----------|----------------------------------------------------------------------|--------------|
|  | 3.845 | 0.6408 | 1.29592  | [Pyruvate dehydrogenase [lipoamide]] kinase isozyme 2, mitochondrial | PK2_HUMAN    |
|  | 3.719 | 0.6198 | 1.22654  | Retinol-binding protein 4                                            | RET4_HUMAN   |
|  | 3.844 | 0.6406 | 1.19962  | Glutathione-requiring prostaglandin D synthase                       | PTGD2_HUMAN  |
|  | 3.625 | 0.6041 | 1.19457  | Receptor tyrosine-protein kinase erbB-4                              | ERBB4_HUMAN  |
|  | 4.509 | 0.4509 | 1.17668  | Retinoic acid receptor RXR-beta                                      | RXR_B_HUMAN  |
|  | 3.702 | 0.7404 | 1.1759   | Corticosteroid 11-beta-dehydrogenase isozyme 1                       | DH11_HUMAN   |
|  | 3.521 | 0.7042 | 1.16907  | cAMP-specific 3,5-cyclic phosphodiesterase 4D                        | PDE4D_HUMAN  |
|  | 3.736 | 0.5337 | 1.12824  | Retinoic acid receptor gamma                                         | RARG_HUMAN   |
|  | 3.452 | 0.6904 | 1.11485  | Steroid hormone receptor ERR1                                        | P11474       |
|  | 3.652 | 0.6087 | 1.11332  | Tyrosine-protein kinase JAK3                                         | JAK3_HUMAN   |
|  | 3.681 | 0.4601 | 1.0948   | Betaine--homocysteine S-methyltransferase 1                          | Q93088       |
|  | 5.558 | 0.5558 | 1.0784   | Cellular retinoic acid-binding protein 2                             | P29373       |
|  | 3.854 | 0.6423 | 1.04337  | Alcohol dehydrogenase class-3                                        | ADHX_HUMAN   |
|  | 3.756 | 0.5366 | 1.02875  | Tyrosine-protein kinase JAK2                                         | JAK2_HUMAN   |
|  | 3.549 | 0.5915 | 1.01149  | Peroxisome proliferator-activated receptor alpha                     | PPARA_HUMAN  |
|  | 3.458 | 0.5763 | 1.0034   | Insulin-like growth factor IA                                        | P01343       |
|  | 3.55  | 0.5071 | 0.981997 | Peptidyl-prolyl cis-trans isomerase FKBP1A                           | FKBP1A_HUMAN |
|  | 3.612 | 0.516  | 0.98078  | Interleukin-2                                                        | IL2_HUMAN    |
|  | 4.014 | 0.5734 | 0.972549 | Fatty acid-binding protein, brain                                    | FABP7_HUMAN  |
|  | 3.67  | 0.6116 | 0.959584 | Glutathione S-transferase A1                                         | P08263       |
|  | 4.28  | 0.4755 | 0.939564 | Dual specificity mitogen-activated protein kinase kinase 1           | MP2K1_HUMAN  |
|  | 3.559 | 0.7118 | 0.93475  | Calmodulin                                                           | CALM_HUMAN   |

|                                                           |        |         |                           |                                                                  |             |
|-----------------------------------------------------------|--------|---------|---------------------------|------------------------------------------------------------------|-------------|
|                                                           |        |         |                           |                                                                  | MAN         |
|                                                           | 3.359  | 0.6717  | 0.928261                  | Alcohol dehydrogenase 1C                                         | P00326      |
|                                                           | 3.743  | 0.4159  | 0.899302                  | Serine/threonine-protein phosphatase PP1-gamma catalytic subunit | P36873      |
|                                                           | 3.473  | 0.6945  | 0.888726                  | Alpha-tocopherol transfer protein                                | P49638      |
|                                                           | 3.755  | 0.4173  | 0.87453                   | Growth factor receptor-bound protein 2                           | GRB2_HUMAN  |
|                                                           | 3.534  | 0.589   | 0.826336                  | Nuclear receptor subfamily 1 group 1 member 3                    | NR1I3_HUMAN |
|                                                           | 3.685  | 0.6141  | 0.821474                  | Adenosine kinase                                                 | P55263      |
|                                                           | 3.829  | 0.547   | 0.807191                  | Sulfotransferase family cytosolic 2B member 1                    | O00204      |
| <b>2,6,10,14,18-pentamethylcosa-2,6,10,14,18-pentaene</b> | 4.965  | 0.8275  | 2.43115                   | Aldose reductase                                                 | ALDR_HUMAN  |
|                                                           | 5.048  | 0.7211  | 2.33241                   | Lanosterol synthase                                              | ERG7_HUMAN  |
|                                                           | 5.366  | 0.4127  | 2.2261                    | Endothelial protein C receptor                                   | EPCR_HUMAN  |
|                                                           | 4.529  | 0.7549  | 2.2142                    | ADAM 17                                                          | ADA17_HUMAN |
|                                                           | 5.609  | 0.6232  | 2.08708                   | Retinoic acid receptor beta                                      | RARB_HUMAN  |
|                                                           | 4.455  | 0.7425  | 2.04791                   | Flavin reductase                                                 | P30043      |
|                                                           | 4.667  | 0.9334  | 1.82003                   | SEC14-like protein 2                                             | O76054      |
|                                                           | 4.738  | 0.6769  | 1.8034                    | Cytochrome P450 2C8                                              | CP2C8_HUMAN |
|                                                           | 4.603  | 0.7672  | 1.69089                   | Trafficking protein particle complex subunit 3                   | O43617      |
|                                                           | 4.78   | 0.5975  | 1.56401                   | Ferrochelatase, mitochondrial                                    | P22830      |
|                                                           | 4.825  | 0.6032  | 1.54977                   | Retinoic acid receptor gamma                                     | RARG_HUMAN  |
|                                                           | 4.616  | 0.577   | 1.54456                   | Caspase-3                                                        | CASP3_HUMAN |
|                                                           | 5.043  | 0.6304  | 1.53413                   | Histamine N-methyltransferase                                    | P50135      |
|                                                           | 3.969  | 0.9922  | 1.4581                    | Nuclear receptor ROR-alpha                                       | RORA_HUMAN  |
|                                                           | 4.235  | 0.5293  | 1.45204                   | Vitamin D3 receptor                                              | VDR_HUMAN   |
| 5.695                                                     | 0.7119 | 1.44573 | Retinol-binding protein 4 | RET4_HUMAN                                                       |             |



|  |       |        |         |                                                  |             |
|--|-------|--------|---------|--------------------------------------------------|-------------|
|  | 4     | 0.8    | 1.41275 | Glutathione S-transferase P                      | GSTP1_HUMAN |
|  | 4.241 | 0.7069 | 1.37087 | Mitogen-activated protein kinase 10              | P53779      |
|  | 4.479 | 0.7465 | 1.36323 | Adenosine kinase                                 | P55263      |
|  | 5.018 | 0.6273 | 1.29193 | Fatty acid-binding protein, heart                | FABPH_HUMAN |
|  | 4.568 | 0.6526 | 1.2882  | Hepatocyte nuclear factor 4-gamma                | Q14541      |
|  | 4.05  | 0.81   | 1.27325 | Bile acid receptor                               | NR1H4_HUMAN |
|  | 4.909 | 0.4463 | 1.25393 | Phosphatidylcholine transfer protein             | Q9UKL6      |
|  | 5.285 | 0.5285 | 1.24747 | Retinoic acid receptor RXR-beta                  | RXR_B_HUMAN |
|  | 3.89  | 0.6484 | 1.23574 | cGMP-specific 3,5-cyclic phosphodiesterase       | PDE5A_HUMAN |
|  | 3.926 | 0.7852 | 1.21443 | Steroid hormone receptor ERR1                    | P11474      |
|  | 4.692 | 0.5213 | 1.17934 | Angiotensin II type 1 receptor                   | TIE2_HUMAN  |
|  | 4.623 | 0.6604 | 1.16972 | Sulfotransferase family cytosolic 2B member 1    | O00204      |
|  | 4.696 | 0.6708 | 1.12347 | Fatty acid-binding protein, brain                | FABP7_HUMAN |
|  | 3.853 | 0.7706 | 1.12049 | E3 ubiquitin-protein ligase Mdm2                 | MDM2_HUMAN  |
|  | 4.1   | 0.6833 | 1.10774 | Oxysterols receptor LXR-alpha                    | NR1H3_HUMAN |
|  | 4.308 | 0.7181 | 1.09699 | Glutathione-requiring prostaglandin D synthase   | PTGD2_HUMAN |
|  | 4.534 | 0.6477 | 1.07865 | Gastrotropin                                     | FABP6_HUMAN |
|  | 4.095 | 0.5851 | 1.06567 | Proactivator polypeptide                         | P07602      |
|  | 4     | 0.6667 | 1.06493 | Tyrosine-protein phosphatase non-receptor type 1 | PTN1_HUMAN  |
|  | 4     | 1      | 1.05811 | Kinesin-like protein KIF11                       | KIF11_HUMAN |
|  | 3.859 | 0.6432 | 1.05639 | Renin                                            | REN1_HUMAN  |
|  | 3.855 | 0.771  | 1.03877 | Dipeptidyl peptidase 4                           | DPP4_HUMAN  |

|  |       |        |          |                                                                  |             |
|--|-------|--------|----------|------------------------------------------------------------------|-------------|
|  | 3.868 | 0.7736 | 1.03683  | Histone deacetylase 8                                            | Q9BY41      |
|  | 5.013 | 0.557  | 1.03393  | Dual specificity mitogen-activated protein kinase kinase 1       | MP2K1_HUMAN |
|  | 4.191 | 0.6985 | 1.03015  | Glutathione S-transferase A1                                     | P08263      |
|  | 3.891 | 0.7782 | 1.02868  | Aldo-keto reductase family 1 member C1                           | Q04828      |
|  | 3.957 | 0.4397 | 1.02687  | Bcl-2-like protein 1                                             | Q07817      |
|  | 3.823 | 0.6372 | 1.00811  | Ganglioside GM2 activator                                        | P17900      |
|  | 3.941 | 0.6568 | 0.994957 | Poly [ADP-ribose] polymerase 1                                   | P09874      |
|  | 3.796 | 0.7591 | 0.972135 | Hepatocyte growth factor receptor                                | P08581      |
|  | 4.024 | 0.8048 | 0.96202  | Calmodulin                                                       | CALM_HUMAN  |
|  | 3.75  | 0.9375 | 0.94585  | Cell division protein kinase 2                                   | P24941      |
|  | 4.151 | 0.6918 | 0.944491 | Tyrosine-protein kinase SYK                                      | KSYK_HUMAN  |
|  | 3.839 | 0.7678 | 0.941935 | cAMP-dependent protein kinase catalytic subunit alpha            | P00517      |
|  | 3.868 | 0.7735 | 0.940861 | Proto-oncogene tyrosine-protein kinase Src                       | SRC_HUMAN   |
|  | 4     | 0.5714 | 0.936342 | 72 kDa type IV collagenase                                       | MMP2_HUMAN  |
|  | 3.826 | 0.2943 | 0.919763 | Amine oxidase [flavin-containing] A                              | AOFA_HUMAN  |
|  | 3.954 | 0.659  | 0.919326 | Peroxisome proliferator-activated receptor alpha                 | PPARA_HUMAN |
|  | 4     | 0.8    | 0.909102 | Prothrombin                                                      | THRB_HUMAN  |
|  | 3.844 | 0.7688 | 0.904953 | Vascular endothelial growth factor receptor 2                    | P35968      |
|  | 4     | 0.8    | 0.882343 | Tyrosine-protein phosphatase non-receptor type 11                | PTN11_HUMAN |
|  | 4.005 | 0.6676 | 0.877299 | Nuclear receptor subfamily 1 group 1 member 3                    | NR1I3_HUMAN |
|  | 4.215 | 0.4684 | 0.846869 | Serine/threonine-protein phosphatase PP1-gamma catalytic subunit | P36873      |
|  | 3.993 | 0.6656 | 0.844623 | Tyrosine-protein kinase JAK3                                     | JAK3_HUMAN  |
|  | 4.474 | 0.5592 | 0.811581 | Basic fibroblast growth factor receptor 1                        | FGFR1_HUMAN |

|                                 |        |         |                           |                                                                  |             |
|---------------------------------|--------|---------|---------------------------|------------------------------------------------------------------|-------------|
|                                 | 4      | 0.8     | 0.801312                  | Corticosteroid 11-beta-dehydrogenase isozyme 1                   | DHI1_HUMAN  |
| <b>3,4-Dehydrolycopen-16-al</b> | 5.804  | 0.6449  | 2.76454                   | Angiotensin-1 receptor                                           | TIE2_HUMAN  |
|                                 | 5.835  | 0.7294  | 2.70344                   | Histamine N-methyltransferase                                    | P50135      |
|                                 | 5.027  | 0.7181  | 2.46478                   | Lanosterol synthase                                              | ERG7_HUMAN  |
|                                 | 4.494  | 0.8987  | 2.45705                   | Bile acid receptor                                               | NR1H4_HUMAN |
|                                 | 4.625  | 0.7708  | 2.45004                   | Beta-secretase 1                                                 | P56817      |
|                                 | 5      | 0.7143  | 2.40551                   | Cytochrome P450 2C8                                              | CP2C8_HUMAN |
|                                 | 4.869  | 0.6086  | 2.39689                   | Interleukin-2                                                    | IL2_HUMAN   |
|                                 | 5.344  | 0.411   | 2.3268                    | Endothelial protein C receptor                                   | EPCR_HUMAN  |
|                                 | 4.527  | 0.9055  | 2.31964                   | Alpha-tocopherol transfer protein                                | P49638      |
|                                 | 4.697  | 0.9393  | 2.06565                   | SEC14-like protein 2                                             | O76054      |
|                                 | 4.565  | 0.7609  | 2.01373                   | Dipeptidyl peptidase 4                                           | DPP4_HUMAN  |
|                                 | 4.41   | 0.735   | 1.91133                   | Nuclear receptor subfamily 1 group I member 3                    | NR1I3_HUMAN |
|                                 | 4.545  | 0.6492  | 1.87598                   | Retinoic acid receptor gamma                                     | RARG_HUMAN  |
|                                 | 4.584  | 0.764   | 1.85634                   | Trafficking protein particle complex subunit 3                   | O43617      |
|                                 | 4      | 1       | 1.71871                   | Mitogen-activated protein kinase 14                              | Q16539      |
|                                 | 3.992  | 0.7985  | 1.71561                   | Glutathione S-transferase P                                      | GSTP1_HUMAN |
|                                 | 3.843  | 0.9607  | 1.6852                    | Proto-oncogene tyrosine-protein kinase Src                       | SRC_HUMAN   |
|                                 | 4.56   | 0.5066  | 1.66533                   | Serine/threonine-protein phosphatase PP1-gamma catalytic subunit | P36873      |
|                                 | 4.479  | 0.7464  | 1.65484                   | E3 ubiquitin-protein ligase Mdm2                                 | MDM2_HUMAN  |
|                                 | 3.998  | 0.7997  | 1.65357                   | Histone deacetylase 8                                            | Q9BY41      |
| 3.917                           | 0.9793 | 1.64924 | Coagulation factor X      | FA10_HUMAN                                                       |             |
| 4.316                           | 0.7194 | 1.63752 | Retinol-binding protein 4 | RET4_HUMAN                                                       |             |

|       |        |         |                                                       |             |
|-------|--------|---------|-------------------------------------------------------|-------------|
|       |        |         |                                                       | MAN         |
| 4.113 | 0.6855 | 1.59383 | Flavin reductase                                      | P30043      |
| 3.994 | 0.7987 | 1.568   | cAMP-dependent protein kinase catalytic subunit alpha | P00517      |
| 5.05  | 0.5611 | 1.52196 | Retinoic acid receptor beta                           | RARB_HUMAN  |
| 3.974 | 0.7948 | 1.49084 | Methionine aminopeptidase 2                           | AMPM2_HUMAN |
| 3.875 | 0.6458 | 1.422   | Ganglioside GM2 activator                             | P17900      |
| 4.926 | 0.4479 | 1.41607 | Phosphatidylcholine transfer protein                  | Q9UKL6      |
| 4.269 | 0.7115 | 1.40141 | Glutathione S-transferase A1                          | P08263      |
| 4.491 | 0.6416 | 1.35661 | Hepatocyte nuclear factor 4-gamma                     | Q14541      |
| 3.856 | 0.7712 | 1.35467 | Steroid hormone receptor ERR1                         | P11474      |
| 3.957 | 0.6595 | 1.34158 | Alpha-1-antitrypsin                                   | A1AT_HUMAN  |
| 3.973 | 0.6622 | 1.34148 | Poly [ADP-ribose] polymerase 1                        | P09874      |
| 4     | 1      | 1.33736 | Kinesin-like protein KIF11                            | KIF11_HUMAN |
| 3.843 | 0.6405 | 1.33644 | Renin                                                 | RENI_HUMAN  |
| 3.772 | 0.6287 | 1.29547 | cGMP-specific 3,5-cyclic phosphodiesterase            | PDE5A_HUMAN |
| 4.451 | 0.4945 | 1.28091 | Mast/stem cell growth factor receptor                 | KIT_HUMAN   |
| 4.585 | 0.655  | 1.27627 | Sulfotransferase family cytosolic 2B member 1         | O00204      |
| 3.849 | 0.7698 | 1.20337 | Vascular endothelial growth factor receptor 2         | P35968      |
| 4.079 | 0.5098 | 1.19268 | Proto-oncogene tyrosine-protein kinase ABL1           | P00519      |
| 4.376 | 0.547  | 1.16686 | Ferrochelatase, mitochondrial                         | P22830      |
| 4     | 0.8    | 1.16465 | Tyrosine-protein phosphatase non-receptor type 11     | PTN11_HUMAN |
| 4     | 0.5714 | 1.16268 | 72 kDa type IV collagenase                            | MMP2_HUMAN  |
| 3.794 | 0.7588 | 1.14988 | Tyrosine-protein kinase ITK/TSK                       | Q08881      |
| 3.965 | 0.7929 | 1.12555 | Calmodulin                                            | CALM_HUMAN  |

|  |       |        |          |                                                            |             |
|--|-------|--------|----------|------------------------------------------------------------|-------------|
|  | 3.97  | 0.6617 | 1.12433  | Oxysterols receptor LXR-alpha                              | NR1H3_HUMAN |
|  | 4.989 | 0.5544 | 1.12107  | Dual specificity mitogen-activated protein kinase kinase 1 | MP2K1_HUMAN |
|  | 5.064 | 0.5064 | 1.11941  | Retinoic acid receptor RXR-beta                            | RXRB_HUMAN  |
|  | 3.991 | 0.6651 | 1.11247  | Tyrosine-protein kinase JAK3                               | JAK3_HUMAN  |
|  | 4.565 | 0.6521 | 1.10476  | Fatty acid-binding protein, brain                          | FABP7_HUMAN |
|  | 4     | 0.8    | 1.0935   | Wiskott-Aldrich syndrome protein                           | WASP_HUMAN  |
|  | 4     | 1      | 1.08988  | Vitamin D-binding protein                                  | VTDB_HUMAN  |
|  | 3.659 | 0.9147 | 1.08932  | Nuclear receptor ROR-alpha                                 | RORA_HUMAN  |
|  | 3.745 | 0.9363 | 1.08098  | ADAM 17                                                    | ADA17_HUMAN |
|  | 3.96  | 0.5657 | 1.07329  | Proactivator polypeptide                                   | P07602      |
|  | 4.402 | 0.6289 | 1.06656  | Gastrotropin                                               | FABP6_HUMAN |
|  | 3.828 | 0.4253 | 1.05687  | Bcl-2-like protein 1                                       | Q07817      |
|  | 3.877 | 0.6462 | 1.0449   | Receptor tyrosine-protein kinase erbB-4                    | ERBB4_HUMAN |
|  | 4     | 0.6667 | 1.01931  | cAMP-specific 3,5-cyclic phosphodiesterase 4D              | PDE4D_HUMAN |
|  | 3.743 | 0.6238 | 1.0181   | Insulin-like growth factor IA                              | P01343      |
|  | 4.112 | 0.6853 | 0.998186 | Glutathione-requiring prostaglandin D synthase             | PTGD2_HUMAN |
|  | 3.841 | 0.4801 | 0.992762 | Vitamin D3 receptor                                        | VDR_HUMAN   |
|  | 3.852 | 0.428  | 0.959674 | Phosphatidylinositol 3-kinase regulatory subunit alpha     | P85A_HUMAN  |
|  | 4.894 | 0.5438 | 0.929238 | Cellular retinoic acid-binding protein 2                   | P29373      |
|  | 3.684 | 0.7368 | 0.914864 | Aldo-keto reductase family 1 member C1                     | Q04828      |
|  | 3.954 | 0.4943 | 0.913042 | Stromelysin-1                                              | MMP3_HUMAN  |
|  | 3.85  | 0.7699 | 0.892013 | Prothrombin                                                | THRB_HUMAN  |

|                          |       |        |          |                                                       |             |
|--------------------------|-------|--------|----------|-------------------------------------------------------|-------------|
|                          | 3.765 | 0.4706 | 0.874449 | Heat shock protein HSP 90-beta                        | P08238      |
|                          | 3.774 | 0.6291 | 0.846135 | Peroxisome proliferator-activated receptor alpha      | PPARA_HUMAN |
|                          | 4     | 0.8    | 0.842615 | Estradiol 17-beta-dehydrogenase 1                     | P14061      |
|                          | 3.772 | 0.5388 | 0.820057 | Protein S100-A9                                       | S10A9_HUMAN |
|                          | 4.032 | 0.672  | 0.816553 | Adenosine kinase                                      | P55263      |
|                          | 3.859 | 0.7718 | 0.803441 | Corticosteroid 11-beta-dehydrogenase isozyme 1        | DH11_HUMAN  |
| <b>4,24-methylphenol</b> | 4.191 | 0.8382 | 2.61616  | Aldo-keto reductase family 1 member C1                | Q04828      |
|                          | 4.871 | 0.6088 | 2.53577  | Ferrochelatase, mitochondrial                         | P22830      |
|                          | 3.917 | 0.9791 | 2.46587  | Nuclear receptor ROR-alpha                            | RORA_HUMAN  |
|                          | 4.439 | 0.7398 | 2.46414  | Glutathione S-transferase A1                          | P08263      |
|                          | 4.557 | 0.5696 | 2.40653  | Caspase-3                                             | CASP3_HUMAN |
|                          | 4.792 | 0.599  | 2.33039  | Retinoic acid receptor gamma                          | RARG_HUMAN  |
|                          | 4.428 | 0.738  | 2.31717  | Trafficking protein particle complex subunit 3        | O43617      |
|                          | 5.123 | 0.5692 | 2.25275  | Retinoic acid receptor beta                           | RARB_HUMAN  |
|                          | 4.127 | 0.6878 | 2.19352  | Oxysterols receptor LXR-alpha                         | NR1H3_HUMAN |
|                          | 4.674 | 0.6677 | 2.07741  | Gastrotropin                                          | FABP6_HUMAN |
|                          | 4.24  | 0.6057 | 1.87112  | Lanosterol synthase                                   | ERG7_HUMAN  |
|                          | 4.238 | 0.6054 | 1.84653  | Cytochrome P450 2C8                                   | CP2C8_HUMAN |
|                          | 3.78  | 0.756  | 1.8377   | cAMP-dependent protein kinase catalytic subunit alpha | P00517      |
|                          | 4.218 | 0.703  | 1.82573  | Adenosine kinase                                      | P55263      |
|                          | 4.531 | 0.6473 | 1.79676  | Sulfotransferase family cytosolic 2B member 1         | O00204      |
|                          | 3.673 | 0.6121 | 1.7847   | cGMP-specific 3,5-cyclic phosphodiesterase            | PDE5A_HUMAN |
|                          | 3.829 | 0.6382 | 1.66773  | Peroxisome proliferator-activated receptor alpha      | PPARA_HUMAN |

|  |       |        |         |                                                        |             |
|--|-------|--------|---------|--------------------------------------------------------|-------------|
|  | 3.651 | 0.7302 | 1.65377 | Dipeptidyl peptidase 4                                 | DPP4_HUMAN  |
|  | 3.746 | 0.7493 | 1.62954 | Bile acid receptor                                     | NR1H4_HUMAN |
|  | 4.614 | 0.4195 | 1.61333 | Phosphatidylcholine transfer protein                   | Q9UKL6      |
|  | 3.775 | 0.6292 | 1.60591 | Flavin reductase                                       | P30043      |
|  | 3.874 | 0.5534 | 1.53244 | 72 kDa type IV collagenase                             | MMP2_HUMAN  |
|  | 3.588 | 0.7177 | 1.51798 | Glutathione S-transferase P                            | GSTP1_HUMAN |
|  | 3.568 | 0.8921 | 1.50494 | Cell division protein kinase 2                         | P24941      |
|  | 4.418 | 0.6311 | 1.50104 | Fatty acid-binding protein, brain                      | FABP7_HUMAN |
|  | 4.002 | 0.6669 | 1.48081 | E3 ubiquitin-protein ligase Mdm2                       | MDM2_HUMAN  |
|  | 3.829 | 0.7658 | 1.47394 | Mineralocorticoid receptor                             | MCR_HUMAN   |
|  | 5.105 | 0.6382 | 1.47271 | Retinol-binding protein 4                              | RET4_HUMAN  |
|  | 3.529 | 0.8822 | 1.46099 | Peroxisome proliferator-activated receptor gamma       | PPARG_HUMAN |
|  | 3.585 | 0.5975 | 1.42615 | Histo-blood group ABO system transferase               | P16442      |
|  | 3.482 | 0.8706 | 1.3841  | Estradiol 17-beta-dehydrogenase 1                      | P14061      |
|  | 3.791 | 0.9477 | 1.37659 | Vitamin D-binding protein                              | VTDB_HUMAN  |
|  | 3.744 | 0.7488 | 1.36055 | Calmodulin                                             | CALM_HUMAN  |
|  | 3.539 | 0.7078 | 1.3509  | cAMP-specific 3,5-cyclic phosphodiesterase 4D          | PDE4D_HUMAN |
|  | 3.706 | 0.4117 | 1.33715 | Phosphatidylinositol 3-kinase regulatory subunit alpha | P85A_HUMAN  |
|  | 4.231 | 0.3255 | 1.33502 | Endothelial protein C receptor                         | EPCR_HUMAN  |
|  | 3.858 | 0.7717 | 1.26554 | SEC14-like protein 2                                   | O76054      |
|  | 3.749 | 0.7497 | 1.26527 | Wiskott-Aldrich syndrome protein                       | WASP_HUMAN  |
|  | 4.307 | 0.5384 | 1.26066 | Histamine N-methyltransferase                          | P50135      |
|  | 3.687 | 0.7374 | 1.25682 | Prothrombin                                            | THRB_HUMAN  |

|       |        |          |                                                                |             |
|-------|--------|----------|----------------------------------------------------------------|-------------|
|       |        |          |                                                                | MAN         |
| 3.475 | 0.5792 | 1.21551  | Ganglioside GM2 activator                                      | P17900      |
| 3.445 | 0.689  | 1.13828  | Steroid hormone receptor ERR1                                  | P11474      |
| 3.696 | 0.462  | 1.10348  | Vitamin D3 receptor                                            | VDR_HUMAN   |
| 3.712 | 0.6186 | 1.0901   | Tyrosine-protein kinase<br>ITK/TSK                             | Q08881      |
| 3.819 | 0.5455 | 1.08644  | Protein kinase C theta type                                    | KPCT_HUMAN  |
| 4.498 | 0.4998 | 1.07663  | Dual specificity mitogen-<br>activated protein kinase kinase 1 | MP2K1_HUMAN |
| 3.939 | 0.5626 | 1.07547  | Hepatocyte nuclear factor 4-<br>gamma                          | Q14541      |
| 3.748 | 0.6247 | 1.0724   | Tyrosine-protein kinase SYK                                    | KSYK_HUMAN  |
| 3.81  | 0.635  | 1.06955  | Glutathione-requiring<br>prostaglandin D synthase              | PTGD2_HUMAN |
| 3.738 | 0.534  | 1.06449  | Tyrosine-protein kinase ZAP-70                                 | ZAP70_HUMAN |
| 3.349 | 0.8372 | 1.0592   | Coagulation factor X                                           | FA10_HUMAN  |
| 3.654 | 0.7307 | 1.03092  | Corticosteroid 11-beta-<br>dehydrogenase isozyme 1             | DH11_HUMAN  |
| 3.64  | 0.6067 | 1.00845  | Oxysterols receptor LXR-beta                                   | NR1H2_HUMAN |
| 3.428 | 0.5714 | 0.97203  | Insulin-like growth factor IA                                  | P01343      |
| 3.528 | 0.504  | 0.947722 | Protein S100-A9                                                | S10A9_HUMAN |
| 3.595 | 0.5136 | 0.936724 | Interleukin-2                                                  | IL2_HUMAN   |
| 3.962 | 0.6603 | 0.930248 | Sex hormone-binding globulin                                   | SHBG_HUMAN  |
| 4.423 | 0.4423 | 0.911311 | Retinoic acid receptor RXR-beta                                | RXRβ_HUMAN  |
| 3.665 | 0.4581 | 0.90065  | 3-hydroxy-3-methylglutaryl-<br>coenzyme A reductase            | HMDH_HUMAN  |
| 4.12  | 0.515  | 0.878892 | Glucocorticoid receptor                                        | GCR_HUMAN   |
| 3.803 | 0.6338 | 0.872643 | Alcohol dehydrogenase class-3                                  | ADHX_HUMAN  |
| 3.738 | 0.4153 | 0.839713 | Serine/threonine-protein                                       | P36873      |



|                     |       |        |          |                                               |             |
|---------------------|-------|--------|----------|-----------------------------------------------|-------------|
|                     |       |        |          | phosphatase PP1-gamma catalytic subunit       |             |
|                     | 3.53  | 0.5883 | 0.829981 | Nuclear receptor subfamily 1 group I member 3 | NR1I3_HUMAN |
|                     | 3.796 | 0.5423 | 0.829827 | Cytochrome P450 2C9                           | CP2C9_HUMAN |
|                     | 3.955 | 0.565  | 0.828489 | Fatty acid-binding protein, heart             | FABPH_HUMAN |
| <b>14b-pregnane</b> | 3.721 | 0.7442 | 3.83603  | Glutathione S-transferase P                   | GSTP1_HUMAN |
|                     | 4.306 | 0.5382 | 3.07497  | Retinoic acid receptor RXR-alpha              | RXRA_HUMAN  |
|                     | 3.65  | 0.9124 | 2.7799   | Vitamin D-binding protein                     | VTDB_HUMAN  |
|                     | 3.919 | 0.3014 | 2.22854  | Endothelial protein C receptor                | EPCR_HUMAN  |
|                     | 3.643 | 0.6072 | 2.11363  | Adenosine kinase                              | P55263      |
|                     | 3.319 | 0.6638 | 1.942    | Aldo-keto reductase family 1 member C1        | Q04828      |
|                     | 3.729 | 0.5327 | 1.93126  | Fatty acid-binding protein, heart             | FABPH_HUMAN |
|                     | 3.627 | 0.4534 | 1.70448  | Ferrochelatase, mitochondrial                 | P22830      |
|                     | 3.636 | 0.4546 | 1.35593  | Basic fibroblast growth factor receptor 1     | FGFR1_HUMAN |
|                     | 3.504 | 0.438  | 1.33493  | Retinoic acid receptor gamma                  | RARG_HUMAN  |
|                     | 2.998 | 0.9994 | 1.21757  | Bone morphogenetic protein 2                  | BMP2_HUMAN  |
|                     | 3.556 | 0.5081 | 1.21402  | Fatty acid-binding protein, brain             | FABP7_HUMAN |
|                     | 3.622 | 0.3293 | 1.20299  | Phosphatidylcholine transfer protein          | Q9UKL6      |
|                     | 3.838 | 0.3838 | 1.19123  | Retinoic acid receptor RXR-beta               | RXRB_HUMAN  |
|                     | 3.832 | 0.4258 | 1.16636  | Cellular retinoic acid-binding protein 2      | P29373      |
|                     | 2.953 | 0.7384 | 1.16     | Carbonic anhydrase 2                          | CAH2_HUMAN  |
|                     | 3.26  | 0.4657 | 1.13588  | Cyclin-A2                                     | CCNA2_HUMAN |
|                     | 3.45  | 0.4929 | 1.11539  | Sulfotransferase family cytosolic             | O00204      |

|       |        |          |                                                                  |             |
|-------|--------|----------|------------------------------------------------------------------|-------------|
|       |        |          | 2B member 1                                                      |             |
| 2.924 | 0.9747 | 1.10927  | Caspase-7                                                        | CASP7_HUMAN |
| 2.968 | 0.742  | 1.09106  | Serine/threonine-protein phosphatase 5                           | P53041      |
| 3.312 | 0.4731 | 1.05566  | Nuclear receptor subfamily 1 group I member 2                    | NR1I2_HUMAN |
| 3.497 | 0.4371 | 1.0188   | Histamine N-methyltransferase                                    | P50135      |
| 2.964 | 0.5927 | 1.01011  | Placenta growth factor                                           | PLGF_HUMAN  |
| 2.914 | 0.7285 | 1.00075  | Proto-oncogene tyrosine-protein kinase Src                       | SRC_HUMAN   |
| 2.883 | 0.9609 | 0.994327 | Aldo-keto reductase family 1 member C2                           | AK1C2_HUMAN |
| 2.94  | 0.7349 | 0.991843 | Estradiol 17-beta-dehydrogenase 1                                | P14061      |
| 3.379 | 0.4827 | 0.980308 | Gastrotropin                                                     | FABP6_HUMAN |
| 3.237 | 0.5394 | 0.967897 | Glutathione-requiring prostaglandin D synthase                   | PTGD2_HUMAN |
| 2.958 | 0.7394 | 0.963437 | Progesterone receptor                                            | PRGR_HUMAN  |
| 3.317 | 0.4739 | 0.959753 | Hepatocyte nuclear factor 4-gamma                                | Q14541      |
| 3.515 | 0.4394 | 0.951383 | Glucocorticoid receptor                                          | GCR_HUMAN   |
| 2.899 | 0.5798 | 0.924215 | Methionine aminopeptidase 2                                      | AMPM2_HUMAN |
| 3.156 | 0.3945 | 0.909206 | Stromelysin-1                                                    | MMP3_HUMAN  |
| 2.917 | 0.4168 | 0.886134 | Coagulation factor VII                                           | FA7_HUMAN   |
| 3.455 | 0.3141 | 0.867841 | Serine/threonine-protein phosphatase PP1-gamma catalytic subunit | P36873      |
| 3.614 | 0.4016 | 0.862332 | Dual specificity mitogen-activated protein kinase kinase 1       | MP2K1_HUMAN |
| 2.948 | 0.7371 | 0.860793 | Amine oxidase [flavin-containing] B                              | AOFB_HUMAN  |
| 2.976 | 0.5951 | 0.854236 | Corticosteroid 11-beta-dehydrogenase isozyme 1                   | P28845      |

|                                                   |       |        |          |                                                    |             |
|---------------------------------------------------|-------|--------|----------|----------------------------------------------------|-------------|
|                                                   | 2.941 | 0.5882 | 0.835559 | E3 ubiquitin-protein ligase<br>Mdm2                | MDM2_HUMAN  |
|                                                   | 2.848 | 0.9492 | 0.818161 | Steryl-sulfatase                                   | STS_HUMAN   |
|                                                   | 3.443 | 0.3826 | 0.806166 | Retinoic acid receptor beta                        | RARB_HUMAN  |
|                                                   | 2.825 | 0.9417 | 0.801665 | Serum albumin                                      | ALBU_HUMAN  |
| <b>4alpha-methyl-24-ethylcholesta-7,24-dienol</b> | 4.362 | 0.8723 | 2.60782  | Mineralocorticoid receptor                         | MCR_HUMAN   |
|                                                   | 3.838 | 0.9595 | 2.48842  | Nuclear receptor ROR-alpha                         | RORA_HUMAN  |
|                                                   | 4.321 | 0.7202 | 2.30157  | Trafficking protein particle<br>complex subunit 3  | O43617      |
|                                                   | 4.186 | 0.8372 | 2.06942  | SEC14-like protein 2                               | O76054      |
|                                                   | 4.601 | 0.6573 | 2.05749  | Sulfotransferase family cytosolic<br>2B member 1   | O00204      |
|                                                   | 3.664 | 0.7328 | 2.03298  | Alcohol dehydrogenase 1C                           | P00326      |
|                                                   | 3.886 | 0.7772 | 1.97368  | Prothrombin                                        | THRB_HUMAN  |
|                                                   | 3.659 | 0.9148 | 1.86391  | Progesterone receptor                              | PRGR_HUMAN  |
|                                                   | 4.134 | 0.5906 | 1.85024  | Lanosterol synthase                                | ERG7_HUMAN  |
|                                                   | 4.128 | 0.8256 | 1.84856  | Estradiol 17-beta-dehydrogenase<br>1               | P14061      |
|                                                   | 4.331 | 0.5414 | 1.84284  | Ferrochelatase, mitochondrial                      | P22830      |
|                                                   | 3.918 | 0.7836 | 1.79218  | Corticosteroid 11-beta-<br>dehydrogenase isozyme 1 | DH11_HUMAN  |
|                                                   | 3.85  | 0.6417 | 1.64625  | Ephrin type-B receptor 4                           | EPHB4_HUMAN |
|                                                   | 3.778 | 0.7555 | 1.63513  | Calmodulin                                         | CALM_HUMAN  |
|                                                   | 3.647 | 0.7294 | 1.59389  | Bile acid receptor                                 | NR1H4_HUMAN |
|                                                   | 3.72  | 0.465  | 1.5917   | Heat shock protein HSP 90-beta                     | P08238      |
|                                                   | 3.998 | 0.5711 | 1.57524  | Cytochrome P450 2C8                                | CP2C8_HUMAN |
|                                                   | 3.986 | 0.6644 | 1.53593  | Glutathione-requiring<br>prostaglandin D synthase  | PTGD2_HUMAN |
|                                                   | 3.939 | 0.4924 | 1.51864  | Proto-oncogene tyrosine-protein                    | P00519      |

|       |        |         |                                                            |             |
|-------|--------|---------|------------------------------------------------------------|-------------|
|       |        |         | kinase ABL1                                                |             |
| 3.522 | 0.7044 | 1.43629 | Dipeptidyl peptidase 4                                     | DPP4_HUMAN  |
| 3.696 | 0.6159 | 1.42512 | Oxysterols receptor LXR-alpha                              | NR1H3_HUMAN |
| 3.722 | 0.5317 | 1.42223 | Macrophage metalloelastase                                 | MMP12_HUMAN |
| 4.132 | 0.5903 | 1.3833  | Gastrotropin                                               | FABP6_HUMAN |
| 4.716 | 0.4716 | 1.3823  | Retinoic acid receptor RXR-beta                            | RXRβ_HUMAN  |
| 3.699 | 0.6165 | 1.37979 | Nuclear receptor subfamily 1 group 1 member 3              | NR1I3_HUMAN |
| 3.635 | 0.4039 | 1.36568 | Phosphatidylinositol 3-kinase regulatory subunit alpha     | P85A_HUMAN  |
| 3.524 | 0.7049 | 1.36257 | Aldo-keto reductase family 1 member C1                     | Q04828      |
| 3.447 | 0.8617 | 1.35679 | Collagenase 3                                              | MMP13_HUMAN |
| 3.708 | 0.5297 | 1.31695 | Interleukin-2                                              | IL2_HUMAN   |
| 4.547 | 0.5053 | 1.26263 | Dual specificity mitogen-activated protein kinase kinase 1 | MP2K1_HUMAN |
| 3.98  | 0.5686 | 1.25573 | Estrogen sulfotransferase                                  | ST1E1_HUMAN |
| 3.374 | 0.5623 | 1.2447  | cGMP-specific 3,5-cyclic phosphodiesterase                 | PDE5A_HUMAN |
| 3.389 | 0.5648 | 1.24219 | Peroxisome proliferator-activated receptor delta           | PPARD_HUMAN |
| 4.02  | 0.5743 | 1.23524 | Mitogen-activated protein kinase 10                        | MK10_HUMAN  |
| 3.94  | 0.5628 | 1.23479 | Hepatocyte nuclear factor 4-gamma                          | Q14541      |
| 3.617 | 0.5166 | 1.2149  | 72 kDa type IV collagenase                                 | MMP2_HUMAN  |
| 3.602 | 0.7205 | 1.19488 | Tyrosine-protein phosphatase non-receptor type 11          | PTN11_HUMAN |
| 4.226 | 0.3841 | 1.18586 | Phosphatidylcholine transfer protein                       | Q9UKL6      |
| 3.514 | 0.5856 | 1.17179 | Flavin reductase                                           | P30043      |
| 3.535 | 0.4418 | 1.1617  | Vitamin D3 receptor                                        | VDR_HUMAN   |

|                                                             |       |        |          |                                                                                   |                 |
|-------------------------------------------------------------|-------|--------|----------|-----------------------------------------------------------------------------------|-----------------|
|                                                             |       |        |          |                                                                                   | AN              |
|                                                             | 3.55  | 0.5916 | 1.15969  | NAD(P)H dehydrogenase<br>[quinone] 1                                              | NQO1_HU<br>MAN  |
|                                                             | 4.693 | 0.5866 | 1.15131  | Retinol-binding protein 4                                                         | RET4_HU<br>MAN  |
|                                                             | 5.818 | 0.5818 | 1.14382  | Cellular retinoic acid-binding<br>protein 2                                       | P29373          |
|                                                             | 3.677 | 0.6128 | 1.1126   | Glutathione S-transferase A1                                                      | P08263          |
|                                                             | 3.595 | 0.8987 | 1.10456  | Vitamin D-binding protein                                                         | VTDB_HU<br>MAN  |
|                                                             | 3.347 | 0.6694 | 1.09361  | Glutathione S-transferase P                                                       | GSTP1_HU<br>MAN |
|                                                             | 3.618 | 0.5168 | 1.09249  | Protein<br>farnesyltransferase/geranylgerany<br>ltransferase type-1 subunit alpha | FNTA_HU<br>MAN  |
|                                                             | 4.162 | 0.4624 | 1.0706   | Retinoic acid receptor beta                                                       | RARB_HU<br>MAN  |
|                                                             | 3.827 | 0.4252 | 1.03818  | Mast/stem cell growth factor<br>receptor                                          | KIT_HUM<br>AN   |
|                                                             | 3.355 | 0.6709 | 1.01381  | cAMP-dependent protein kinase<br>catalytic subunit alpha                          | P00517          |
|                                                             | 3.701 | 0.7401 | 0.936468 | Bile salt sulfotransferase                                                        | Q06520          |
|                                                             | 3.434 | 0.5724 | 0.933787 | Receptor tyrosine-protein kinase<br>erbB-4                                        | ERBB4_HU<br>MAN |
|                                                             | 3.356 | 0.5594 | 0.930556 | Alpha-1-antitrypsin                                                               | A1AT_HU<br>MAN  |
|                                                             | 3.518 | 0.5864 | 0.921651 | Oxysterols receptor LXR-beta                                                      | NR1H2_HU<br>MAN |
|                                                             | 3.315 | 0.8287 | 0.890967 | Estrogen receptor                                                                 | ESR1_HUM<br>AN  |
|                                                             | 3.823 | 0.4779 | 0.890012 | Phospholipase A2, membrane<br>associated                                          | P14555          |
|                                                             | 3.856 | 0.2966 | 0.871367 | Endothelial protein C receptor                                                    | EPCR_HU<br>MAN  |
|                                                             | 3.844 | 0.4271 | 0.823609 | Angiopoietin-1 receptor                                                           | TIE2_HUM<br>AN  |
|                                                             | 3.226 | 0.5376 | 0.802127 | Ganglioside GM2 activator                                                         | P17900          |
| <b>4alpha,14alpha,24-<br/>trimethylcholesta-8,24-dienol</b> | 5.33  | 0.6663 | 3.11013  | Ferrochelatase, mitochondrial                                                     | P22830          |
|                                                             | 4.366 | 0.5458 | 2.56843  | Vitamin D3 receptor                                                               | VDR_HUM<br>AN   |
|                                                             | 3.981 | 0.9952 | 2.53047  | Nuclear receptor ROR-alpha                                                        | RORA_HU         |

|       |        |         |                                                                      |             |
|-------|--------|---------|----------------------------------------------------------------------|-------------|
|       |        |         |                                                                      | MAN         |
| 5.027 | 0.7181 | 2.4992  | Gastrotropin                                                         | FABP6_HUMAN |
| 4.294 | 0.7156 | 2.45042 | Oxysterols receptor LXR-alpha                                        | NR1H3_HUMAN |
| 4.264 | 0.6091 | 2.19507 | Renin                                                                | RENI_HUMAN  |
| 4.457 | 0.6367 | 2.15947 | Lanosterol synthase                                                  | ERG7_HUMAN  |
| 4.134 | 0.8267 | 2.14691 | Calmodulin                                                           | CALM_HUMAN  |
| 3.851 | 0.9628 | 1.98313 | Transthyretin                                                        | TTHY_HUMAN  |
| 3.986 | 0.6644 | 1.9384  | Oxysterols receptor LXR-beta                                         | NR1H2_HUMAN |
| 3.933 | 0.5619 | 1.79352 | Protein S100-A9                                                      | S10A9_HUMAN |
| 4.86  | 0.6075 | 1.74551 | Fatty acid-binding protein, heart                                    | FABPH_HUMAN |
| 3.877 | 0.9693 | 1.72313 | Kinesin-like protein KIF11                                           | KIF11_HUMAN |
| 4.024 | 0.6706 | 1.71045 | Retinol-binding protein 4                                            | RET4_HUMAN  |
| 4.123 | 0.6872 | 1.68385 | [Pyruvate dehydrogenase [lipoamide]] kinase isozyme 2, mitochondrial | PDK2_HUMAN  |
| 4.117 | 0.8233 | 1.67344 | SEC14-like protein 2                                                 | O76054      |
| 4.302 | 0.6146 | 1.61975 | Hepatocyte nuclear factor 4-gamma                                    | Q14541      |
| 5.058 | 0.5058 | 1.56142 | Retinoic acid receptor RXR-beta                                      | RXRB_HUMAN  |
| 4.508 | 0.6441 | 1.54803 | Fatty acid-binding protein, brain                                    | FABP7_HUMAN |
| 3.718 | 0.7436 | 1.54495 | Aldo-keto reductase family 1 member C1                               | Q04828      |
| 3.738 | 0.7475 | 1.54449 | Bile acid receptor                                                   | NR1H4_HUMAN |
| 4.368 | 0.546  | 1.54441 | Peptidyl-prolyl cis-trans isomerase FKBP1A                           | FKB1A_HUMAN |
| 3.89  | 0.5557 | 1.49811 | 72 kDa type IV collagenase                                           | MMP2_HUMAN  |

|  |       |        |         |                                                            |             |
|--|-------|--------|---------|------------------------------------------------------------|-------------|
|  | 3.624 | 0.6039 | 1.48067 | Histo-blood group ABO system transferase                   | P16442      |
|  | 3.876 | 0.7752 | 1.46328 | Mineralocorticoid receptor                                 | MCR_HUMAN   |
|  | 4     | 0.6667 | 1.44525 | Trafficking protein particle complex subunit 3             | O43617      |
|  | 3.792 | 0.7584 | 1.44146 | Prothrombin                                                | THRB_HUMAN  |
|  | 3.737 | 0.7474 | 1.42061 | Alpha-tocopherol transfer protein                          | P49638      |
|  | 4.333 | 0.3333 | 1.41455 | Endothelial protein C receptor                             | EPCR_HUMAN  |
|  | 3.624 | 0.7247 | 1.41137 | cAMP-dependent protein kinase catalytic subunit alpha      | P00517      |
|  | 3.914 | 0.4892 | 1.38549 | Stromelysin-1                                              | MMP3_HUMAN  |
|  | 4.536 | 0.504  | 1.36798 | Retinoic acid receptor beta                                | RARB_HUMAN  |
|  | 3.921 | 0.6535 | 1.35913 | Glutathione S-transferase A1                               | P08263      |
|  | 4.494 | 0.4086 | 1.35028 | Phosphatidylcholine transfer protein                       | Q9UKL6      |
|  | 3.962 | 0.5659 | 1.27355 | Cytochrome P450 2C8                                        | CP2C8_HUMAN |
|  | 4.724 | 0.5249 | 1.26827 | Dual specificity mitogen-activated protein kinase kinase 1 | MP2K1_HUMAN |
|  | 3.865 | 0.5521 | 1.24307 | Tyrosine-protein kinase ZAP-70                             | ZAP70_HUMAN |
|  | 3.664 | 0.6106 | 1.22638 | Peroxisome proliferator-activated receptor alpha           | PPARA_HUMAN |
|  | 3.75  | 0.9375 | 1.20854 | Vitamin D-binding protein                                  | VTDB_HUMAN  |
|  | 3.713 | 0.6188 | 1.16027 | Tyrosine-protein kinase JAK3                               | JAK3_HUMAN  |
|  | 3.699 | 0.6165 | 1.13749 | Nuclear receptor subfamily 1 group 1 member 3              | NR1I3_HUMAN |
|  | 3.467 | 0.6934 | 1.12701 | NAD(P)H dehydrogenase [quinone] 1                          | NQO1_HUMAN  |
|  | 4.108 | 0.5869 | 1.10097 | Sulfotransferase family cytosolic 2B member 1              | O00204      |
|  | 3.776 | 0.5395 | 1.1     | Retinoic acid receptor gamma                               | RARG_HUMAN  |
|  | 3.46  | 0.692  | 1.09501 | Dipeptidyl peptidase 4                                     | DPP4_HUMAN  |

|                                               |       |        |          |                                                                  |             |
|-----------------------------------------------|-------|--------|----------|------------------------------------------------------------------|-------------|
|                                               |       |        |          |                                                                  | AN          |
|                                               | 3.852 | 0.5503 | 1.08596  | Protein kinase C theta type                                      | KPCT_HUMAN  |
|                                               | 3.667 | 0.6112 | 1.05539  | Ephrin type-B receptor 4                                         | EPHB4_HUMAN |
|                                               | 3.646 | 0.7292 | 1.05026  | Tyrosine-protein phosphatase non-receptor type 11                | PTN11_HUMAN |
|                                               | 3.665 | 0.7331 | 0.999346 | Corticosteroid 11-beta-dehydrogenase isozyme 1                   | DH11_HUMAN  |
|                                               | 3.634 | 0.7269 | 0.956824 | Wiskott-Aldrich syndrome protein                                 | WASP_HUMAN  |
|                                               | 3.756 | 0.7511 | 0.943521 | Estradiol 17-beta-dehydrogenase 1                                | P14061      |
|                                               | 4.205 | 0.5256 | 0.930676 | Glucocorticoid receptor                                          | GCR_HUMAN   |
|                                               | 3.364 | 0.5607 | 0.921107 | Ganglioside GM2 activator                                        | P17900      |
|                                               | 3.656 | 0.6094 | 0.914365 | Tyrosine-protein kinase ITK/TSK                                  | Q08881      |
|                                               | 3.492 | 0.4365 | 0.88944  | Heat shock protein HSP 90-beta                                   | P08238      |
|                                               | 3.495 | 0.5825 | 0.886207 | Tyrosine-protein phosphatase non-receptor type 1                 | PTN1_HUMAN  |
|                                               | 3.378 | 0.8446 | 0.876459 | Progesterone receptor                                            | PRGR_HUMAN  |
|                                               | 3.488 | 0.5814 | 0.870463 | Flavin reductase                                                 | P30043      |
|                                               | 3.367 | 0.6733 | 0.846478 | Histone deacetylase 8                                            | Q9BY41      |
|                                               | 3.845 | 0.5492 | 0.837947 | Estrogen sulfotransferase                                        | ST1E1_HUMAN |
|                                               | 3.64  | 0.6066 | 0.832776 | Hepatocyte growth factor receptor                                | MET_HUMAN   |
|                                               | 3.382 | 0.5637 | 0.826747 | Insulin-like growth factor IA                                    | P01343      |
|                                               | 3.769 | 0.5385 | 0.82538  | Nuclear receptor subfamily 1 group I member 2                    | NR1I2_HUMAN |
|                                               | 3.802 | 0.5432 | 0.824358 | Thyroid hormone receptor alpha                                   | P10827      |
|                                               | 3.754 | 0.4171 | 0.813726 | Serine/threonine-protein phosphatase PP1-gamma catalytic subunit | P36873      |
|                                               | 3.549 | 0.507  | 0.812263 | Neutrophil gelatinase-associated lipocalin                       | NGAL_HUMAN  |
| <b>4alpha,24-dimethylcholesta-7,24-dienol</b> | 3.953 | 0.9883 | 2.77026  | Nuclear receptor ROR-alpha                                       | RORA_HUMAN  |
|                                               | 4.088 | 0.6813 | 2.30725  | Oxysterols receptor LXR-alpha                                    | NR1H3_HUMAN |



|       |        |         |                                                     |                 |
|-------|--------|---------|-----------------------------------------------------|-----------------|
|       |        |         |                                                     | MAN             |
| 4.266 | 0.8533 | 2.10781 | Estradiol 17-beta-dehydrogenase<br>1                | P14061          |
| 3.687 | 0.7373 | 2.06189 | Alcohol dehydrogenase 1C                            | P00326          |
| 3.852 | 0.7704 | 2.06118 | Aldo-keto reductase family 1<br>member C1           | Q04828          |
| 4.233 | 0.6047 | 2.0339  | Lanosterol synthase                                 | ERG7_HU<br>MAN  |
| 4.577 | 0.6538 | 2.03303 | Sulfotransferase family cytosolic<br>2B member 1    | O00204          |
| 4.167 | 0.8335 | 2.02997 | SEC14-like protein 2                                | O76054          |
| 3.71  | 0.6183 | 1.9444  | Ganglioside GM2 activator                           | P17900          |
| 3.801 | 0.7601 | 1.93644 | Bile acid receptor                                  | NR1H4_HU<br>MAN |
| 3.969 | 0.6614 | 1.85014 | Retinol-binding protein 4                           | RET4_HU<br>MAN  |
| 3.611 | 0.9028 | 1.79288 | Mineralocorticoid receptor                          | MCR_HUM<br>AN   |
| 4.057 | 0.6762 | 1.76725 | E3 ubiquitin-protein ligase<br>Mdm2                 | MDM2_HU<br>MAN  |
| 3.913 | 0.559  | 1.75378 | 72 kDa type IV collagenase                          | MMP2_HU<br>MAN  |
| 4.272 | 0.5341 | 1.74978 | Ferrochelatase, mitochondrial                       | P22830          |
| 3.743 | 0.6238 | 1.74441 | Tyrosine-protein phosphatase<br>non-receptor type 1 | PTN1_HU<br>MAN  |
| 3.863 | 0.7725 | 1.65304 | Corticosteroid 11-beta-<br>dehydrogenase isozyme 1  | DHI1_HUM<br>AN  |
| 3.978 | 0.6629 | 1.63658 | Trafficking protein particle<br>complex subunit 3   | O43617          |
| 3.582 | 0.5971 | 1.61758 | Renin                                               | RENI_HUM<br>AN  |
| 3.579 | 0.8948 | 1.6117  | Progesterone receptor                               | PRGR_HU<br>MAN  |
| 3.566 | 0.8916 | 1.59059 | Collagenase 3                                       | MMP13_H<br>UMAN |
| 3.797 | 0.9493 | 1.57558 | Vitamin D-binding protein                           | VTDB_HU<br>MAN  |
| 3.809 | 0.6348 | 1.5436  | Ephrin type-B receptor 4                            | EPHB4_HU<br>MAN |
| 4.29  | 0.715  | 1.54072 | Sex hormone-binding globulin                        | SHBG_HU<br>MAN  |

|  |       |        |         |                                                                  |             |
|--|-------|--------|---------|------------------------------------------------------------------|-------------|
|  | 4.114 | 0.5142 | 1.53607 | Retinoic acid receptor alpha                                     | RARA_HUMAN  |
|  | 3.522 | 0.7045 | 1.51421 | Glutathione S-transferase P                                      | GSTP1_HUMAN |
|  | 3.727 | 0.7453 | 1.49003 | Calmodulin                                                       | CALM_HUMAN  |
|  | 3.705 | 0.741  | 1.48299 | Prothrombin                                                      | THRB_HUMAN  |
|  | 4.689 | 0.521  | 1.45256 | Dual specificity mitogen-activated protein kinase kinase 1       | MP2K1_HUMAN |
|  | 4.085 | 0.5836 | 1.42356 | Estrogen sulfotransferase                                        | ST1E1_HUMAN |
|  | 4.148 | 0.5926 | 1.40586 | Gastrotropin                                                     | FABP6_HUMAN |
|  | 3.907 | 0.5582 | 1.39184 | Cytochrome P450 2C8                                              | CP2C8_HUMAN |
|  | 3.813 | 0.5447 | 1.38035 | Retinoic acid receptor gamma                                     | RARG_HUMAN  |
|  | 3.71  | 0.53   | 1.2979  | Interleukin-2                                                    | IL2_HUMAN   |
|  | 4.298 | 0.3907 | 1.29625 | Phosphatidylcholine transfer protein                             | Q9UKL6      |
|  | 3.773 | 0.6288 | 1.28736 | Glutathione S-transferase A1                                     | P08263      |
|  | 3.975 | 0.5678 | 1.28714 | Hepatocyte nuclear factor 4-gamma                                | Q14541      |
|  | 4.267 | 0.4267 | 1.27668 | Vitamin D3 receptor                                              | VDR_HUMAN   |
|  | 3.333 | 0.8332 | 1.23699 | Troponin C, slow skeletal and cardiac muscles                    | P63316      |
|  | 4.28  | 0.4755 | 1.23699 | Retinoic acid receptor beta                                      | RARB_HUMAN  |
|  | 3.632 | 0.7264 | 1.23333 | Tyrosine-protein phosphatase non-receptor type 11                | PTN11_HUMAN |
|  | 4.196 | 0.3814 | 1.16575 | Serine/threonine-protein phosphatase PP1-gamma catalytic subunit | P36873      |
|  | 4.104 | 0.5863 | 1.15247 | Fatty acid-binding protein, brain                                | FABP7_HUMAN |
|  | 4.009 | 0.3084 | 1.11616 | Endothelial protein C receptor                                   | EPCR_HUMAN  |
|  | 3.515 | 0.4394 | 1.11342 | Heat shock protein HSP 90-beta                                   | P08238      |

|                                            |       |        |          |                                                                            |             |
|--------------------------------------------|-------|--------|----------|----------------------------------------------------------------------------|-------------|
|                                            | 3.498 | 0.8745 | 1.08991  | Kinesin-like protein KIF11                                                 | KIF11_HUMAN |
|                                            | 3.668 | 0.6114 | 1.0548   | Tyrosine-protein kinase SYK                                                | KSYK_HUMAN  |
|                                            | 3.476 | 0.5794 | 1.0364   | Flavin reductase                                                           | P30043      |
|                                            | 3.601 | 0.5144 | 1.02115  | Protein farnesyltransferase/geranylgeranyltransferase type-1 subunit alpha | FNTA_HUMAN  |
|                                            | 3.642 | 0.5202 | 1.01466  | Tyrosine-protein kinase ZAP-70                                             | ZAP70_HUMAN |
|                                            | 3.769 | 0.4188 | 0.99552  | Growth factor receptor-bound protein 2                                     | GRB2_HUMAN  |
|                                            | 5.574 | 0.5574 | 0.995124 | Cellular retinoic acid-binding protein 2                                   | P29373      |
|                                            | 3.551 | 0.7103 | 0.972897 | Wiskott-Aldrich syndrome protein                                           | WASP_HUMAN  |
|                                            | 3.614 | 0.4517 | 0.904167 | Proto-oncogene tyrosine-protein kinase ABL1                                | P00519      |
|                                            | 3.509 | 0.5848 | 0.867275 | Oxysterols receptor LXR-beta                                               | NR1H2_HUMAN |
|                                            | 3.598 | 0.5996 | 0.818196 | Glutathione-requiring prostaglandin D synthase                             | PTGD2_HUMAN |
|                                            | 3.361 | 0.6722 | 0.803683 | Alpha-tocopherol transfer protein                                          | P49638      |
| <b>6-Fluoroindole-7-Dehydrocholesterol</b> | 4.533 | 0.7555 | 2.72441  | Trafficking protein particle complex subunit 3                             | O43617      |
|                                            | 3.924 | 0.981  | 2.69583  | Nuclear receptor ROR-alpha                                                 | RORA_HUMAN  |
|                                            | 4.439 | 0.7399 | 2.46717  | Adenosine kinase                                                           | P55263      |
|                                            | 4.439 | 0.6342 | 2.41211  | Cytochrome P450 2C8                                                        | CP2C8_HUMAN |
|                                            | 3.883 | 0.6472 | 2.37424  | Ganglioside GM2 activator                                                  | P17900      |
|                                            | 4.134 | 0.8268 | 1.96749  | SEC14-like protein 2                                                       | O76054      |
|                                            | 3.792 | 0.7584 | 1.91588  | Bile acid receptor                                                         | NR1H4_HUMAN |
|                                            | 3.979 | 0.6631 | 1.87319  | Retinol-binding protein 4                                                  | RET4_HUMAN  |
|                                            | 5.003 | 0.5559 | 1.8576   | Dual specificity mitogen-activated protein kinase kinase 1                 | MP2K1_HUMAN |
|                                            | 3.675 | 0.9188 | 1.84156  | Collagenase 3                                                              | MMP13_HUMAN |
|                                            | 3.9   | 0.65   | 1.81041  | Nuclear receptor subfamily 1                                               | NR1I3_HUMAN |

|       |        |         |                                                                        |                 |
|-------|--------|---------|------------------------------------------------------------------------|-----------------|
|       |        |         | group 1 member 3                                                       | MAN             |
| 3.651 | 0.9129 | 1.80818 | Progesterone receptor                                                  | PRGR_HU<br>MAN  |
| 3.996 | 0.5708 | 1.75265 | Retinoic acid receptor gamma                                           | RARG_HU<br>MAN  |
| 4.369 | 0.6241 | 1.71223 | Sulfotransferase family cytosolic<br>2B member 1                       | O00204          |
| 3.841 | 0.9603 | 1.68748 | Vitamin D-binding protein                                              | VTDB_HU<br>MAN  |
| 3.809 | 0.5441 | 1.64175 | Proto-oncogene tyrosine-protein<br>kinase LCK                          | LCK_HUM<br>AN   |
| 3.853 | 0.5505 | 1.63191 | Basic fibroblast growth factor<br>receptor 1                           | FGFR1_HU<br>MAN |
| 3.758 | 0.6263 | 1.6311  | Receptor tyrosine-protein kinase<br>erbB-4                             | ERBB4_HU<br>MAN |
| 3.77  | 0.5386 | 1.62825 | Tyrosine-protein phosphatase<br>non-receptor type 1                    | PTN1_HU<br>MAN  |
| 3.536 | 0.7073 | 1.5515  | Glutathione S-transferase P                                            | GSTP1_HU<br>MAN |
| 3.613 | 0.7225 | 1.52679 | Aldo-keto reductase family 1<br>member C1                              | Q04828          |
| 4.432 | 0.4432 | 1.51896 | Vitamin D3 receptor                                                    | VDR_HUM<br>AN   |
| 3.844 | 0.6406 | 1.4368  | Glutathione S-transferase A1                                           | P08263          |
| 3.761 | 0.7522 | 1.4245  | Corticosteroid 11-beta-<br>dehydrogenase isozyme 1                     | DH11_HUM<br>AN  |
| 4.19  | 0.6984 | 1.3939  | Sex hormone-binding globulin                                           | SHBG_HU<br>MAN  |
| 3.843 | 0.7687 | 1.30172 | Estradiol 17-beta-dehydrogenase<br>1                                   | P14061          |
| 3.88  | 0.4311 | 1.27712 | Serine/threonine-protein<br>phosphatase PP1-gamma<br>catalytic subunit | P36873          |
| 3.649 | 0.5212 | 1.25038 | 72 kDa type IV collagenase                                             | MMP2_HU<br>MAN  |
| 4.03  | 0.5758 | 1.24675 | Mitogen-activated protein kinase<br>10                                 | MK10_HU<br>MAN  |
| 3.536 | 0.5893 | 1.23593 | Poly [ADP-ribose] polymerase 1                                         | P09874          |
| 3.951 | 0.4938 | 1.22427 | Ferrochelatase, mitochondrial                                          | P22830          |
| 3.511 | 0.5852 | 1.22054 | Alpha-1-antitrypsin                                                    | A1AT_HU<br>MAN  |

|  |       |        |          |                                                        |             |
|--|-------|--------|----------|--------------------------------------------------------|-------------|
|  | 3.34  | 0.8351 | 1.21657  | Mineralocorticoid receptor                             | MCR_HUMAN   |
|  | 3.723 | 0.5318 | 1.18716  | Insulin-like growth factor IA                          | P01343      |
|  | 3.785 | 0.5407 | 1.18624  | Lanosterol synthase                                    | ERG7_HUMAN  |
|  | 3.598 | 0.7196 | 1.15234  | Tyrosine-protein phosphatase non-receptor type 11      | PTN11_HUMAN |
|  | 3.963 | 0.5662 | 1.10757  | Gastrotropin                                           | FABP6_HUMAN |
|  | 3.605 | 0.6008 | 1.07855  | Oxysterols receptor LXR-beta                           | NR1H2_HUMAN |
|  | 3.852 | 0.5503 | 1.0637   | Hepatocyte nuclear factor 4-gamma                      | Q14541      |
|  | 3.976 | 0.3058 | 1.06215  | Endothelial protein C receptor                         | EPCR_HUMAN  |
|  | 3.48  | 0.58   | 1.04553  | Flavin reductase                                       | P30043      |
|  | 4.121 | 0.4579 | 1.01216  | Retinoic acid receptor beta                            | RARB_HUMAN  |
|  | 3.516 | 0.586  | 0.97964  | Oxysterols receptor LXR-alpha                          | NR1H3_HUMAN |
|  | 3.312 | 0.6623 | 0.968733 | Steroid hormone receptor ERR1                          | P11474      |
|  | 5.512 | 0.5512 | 0.954851 | Cellular retinoic acid-binding protein 2               | P29373      |
|  | 3.319 | 0.8296 | 0.927031 | ADAM 17                                                | ADA17_HUMAN |
|  | 3.463 | 0.3848 | 0.918682 | Phosphatidylinositol 3-kinase regulatory subunit alpha | P85A_HUMAN  |
|  | 3.463 | 0.4948 | 0.907722 | Serine/threonine-protein kinase 6                      | O14965      |
|  | 3.629 | 0.6049 | 0.876361 | E3 ubiquitin-protein ligase Mdm2                       | MDM2_HUMAN  |
|  | 3.934 | 0.562  | 0.876244 | Fatty acid-binding protein, brain                      | FABP7_HUMAN |
|  | 4.266 | 0.4266 | 0.844636 | Retinoic acid receptor RXR-beta                        | RXR_B_HUMAN |
|  | 3.3   | 0.66   | 0.827588 | cAMP-dependent protein kinase catalytic subunit alpha  | P00517      |
|  | 3.247 | 0.6494 | 0.825318 | Hepatocyte growth factor receptor                      | P08581      |
|  | 3.365 | 0.6731 | 0.821592 | Phospholipase A2, membrane associated                  | P14555      |
|  | 3.568 | 0.446  | 0.818643 | Proto-oncogene tyrosine-protein                        | P00519      |

|                       |        |         |                          |                                                            |             |
|-----------------------|--------|---------|--------------------------|------------------------------------------------------------|-------------|
|                       |        |         |                          | kinase ABL1                                                |             |
|                       | 3.715  | 0.5308  | 0.800218                 | Estrogen sulfotransferase                                  | ST1E1_HUMAN |
| <b>daucosterol_qt</b> | 4.237  | 0.8475  | 3.34326                  | Histone deacetylase 8                                      | Q9BY41      |
|                       | 4.466  | 0.7444  | 3.19072                  | Oxysterols receptor LXR-alpha                              | NR1H3_HUMAN |
|                       | 4.431  | 0.7385  | 2.55004                  | E3 ubiquitin-protein ligase Mdm2                           | MDM2_HUMAN  |
|                       | 4.202  | 0.8404  | 2.09313                  | SEC14-like protein 2                                       | O76054      |
|                       | 4.226  | 0.7043  | 2.02377                  | Adenosine kinase                                           | P55263      |
|                       | 5.096  | 0.5662  | 1.99267                  | Dual specificity mitogen-activated protein kinase kinase 1 | MP2K1_HUMAN |
|                       | 4.111  | 0.6852  | 1.9812                   | Glutathione S-transferase A1                               | P08263      |
|                       | 4.786  | 0.5318  | 1.97351                  | Retinoic acid receptor beta                                | RARB_HUMAN  |
|                       | 4.147  | 0.6911  | 1.95767                  | Trafficking protein particle complex subunit 3             | O43617      |
|                       | 4.708  | 0.428   | 1.93756                  | Phosphatidylcholine transfer protein                       | Q9UKL6      |
|                       | 3.946  | 0.6577  | 1.89243                  | Nuclear receptor subfamily 1 group 1 member 3              | NR1I3_HUMAN |
|                       | 4.342  | 0.5427  | 1.86474                  | Ferrochelatase, mitochondrial                              | P22830      |
|                       | 4.479  | 0.6399  | 1.77027                  | Fatty acid-binding protein, brain                          | FABP7_HUMAN |
|                       | 4.118  | 0.6863  | 1.75785                  | Glutathione-requiring prostaglandin D synthase             | PTGD2_HUMAN |
|                       | 4.584  | 0.4584  | 1.74351                  | Vitamin D3 receptor                                        | VDR_HUMAN   |
|                       | 3.766  | 0.6277  | 1.73355                  | Flavin reductase                                           | P30043      |
|                       | 3.597  | 0.5996  | 1.72213                  | cGMP-specific 3,5-cyclic phosphodiesterase                 | PDE5A_HUMAN |
|                       | 3.651  | 0.7302  | 1.65402                  | Dipeptidyl peptidase 4                                     | DPP4_HUMAN  |
|                       | 4.317  | 0.3321  | 1.63593                  | Endothelial protein C receptor                             | EPCR_HUMAN  |
|                       | 3.509  | 0.8772  | 1.54416                  | Nuclear receptor ROR-alpha                                 | RORA_HUMAN  |
| 3.723                 | 0.5318 | 1.53092 | Protein S100-A9          | S10A9_HUMAN                                                |             |
| 3.809                 | 0.6348 | 1.51854 | Ephrin type-B receptor 4 | EPHB4_HUMAN                                                |             |

|  |       |        |         |                                                                      |             |
|--|-------|--------|---------|----------------------------------------------------------------------|-------------|
|  | 3.81  | 0.635  | 1.49388 | Retinol-binding protein 4                                            | RET4_HUMAN  |
|  | 3.74  | 0.7481 | 1.48859 | Calmodulin                                                           | CALM_HUMAN  |
|  | 3.608 | 0.7216 | 1.47849 | Aldo-keto reductase family 1 member C1                               | Q04828      |
|  | 3.897 | 0.6495 | 1.4615  | [Pyruvate dehydrogenase [lipoamide]] kinase isozyme 2, mitochondrial | PDK2_HUMAN  |
|  | 4.432 | 0.5539 | 1.46073 | Glucocorticoid receptor                                              | GCR_HUMAN   |
|  | 3.763 | 0.9407 | 1.45762 | Vitamin D-binding protein                                            | VTDB_HUMAN  |
|  | 3.683 | 0.4604 | 1.4521  | Heat shock protein HSP 90-beta                                       | P08238      |
|  | 3.742 | 0.6236 | 1.45022 | Mitogen-activated protein kinase 10                                  | P53779      |
|  | 3.848 | 0.5497 | 1.42265 | Insulin-like growth factor IA                                        | P01343      |
|  | 3.932 | 0.5618 | 1.42189 | Cytochrome P450 2C8                                                  | CP2C8_HUMAN |
|  | 3.724 | 0.5321 | 1.3666  | 72 kDa type IV collagenase                                           | MMP2_HUMAN  |
|  | 4.407 | 0.5508 | 1.35724 | Fatty acid-binding protein, heart                                    | FABPH_HUMAN |
|  | 3.459 | 0.8647 | 1.35037 | Cell division protein kinase 2                                       | P24941      |
|  | 4.668 | 0.4668 | 1.3457  | Retinoic acid receptor RXR-beta                                      | RXR_B_HUMAN |
|  | 3.781 | 0.4727 | 1.32016 | Stromelysin-1                                                        | MMP3_HUMAN  |
|  | 3.564 | 0.7128 | 1.31862 | Bile acid receptor                                                   | NR1H4_HUMAN |
|  | 4.078 | 0.5825 | 1.28271 | Gastrotropin                                                         | FABP6_HUMAN |
|  | 3.468 | 0.6936 | 1.27674 | Steroid hormone receptor ERR1                                        | P11474      |
|  | 3.71  | 0.742  | 1.27661 | Corticosteroid 11-beta-dehydrogenase isozyme 1                       | DH11_HUMAN  |
|  | 3.831 | 0.7661 | 1.2555  | Estradiol 17-beta-dehydrogenase 1                                    | P14061      |
|  | 3.895 | 0.5565 | 1.23954 | Nuclear receptor subfamily 1 group 1 member 2                        | NR1I2_HUMAN |
|  | 3.741 | 0.5345 | 1.20729 | Retinoic acid receptor gamma                                         | RARG_HUMAN  |

|                             |       |        |          |                                                                            |             |
|-----------------------------|-------|--------|----------|----------------------------------------------------------------------------|-------------|
|                             | 3.878 | 0.4309 | 1.19489  | Growth factor receptor-bound protein 2                                     | GRB2_HUMAN  |
|                             | 3.573 | 0.5955 | 1.18775  | Peroxisome proliferator-activated receptor alpha                           | PPARA_HUMAN |
|                             | 3.593 | 0.7186 | 1.14746  | Prothrombin                                                                | THRB_HUMAN  |
|                             | 3.64  | 0.728  | 1.14206  | Wiskott-Aldrich syndrome protein                                           | WASP_HUMAN  |
|                             | 3.571 | 0.3968 | 1.13792  | Phosphatidylinositol 3-kinase regulatory subunit alpha                     | P85A_HUMAN  |
|                             | 3.642 | 0.5203 | 1.12962  | Interleukin-2                                                              | IL2_HUMAN   |
|                             | 3.345 | 0.8362 | 1.12752  | Coagulation factor X                                                       | FA10_HUMAN  |
|                             | 3.313 | 0.8283 | 1.11163  | Mineralocorticoid receptor                                                 | MCR_HUMAN   |
|                             | 4.115 | 0.5144 | 1.10249  | Histamine N-methyltransferase                                              | P50135      |
|                             | 3.622 | 0.6037 | 1.08018  | Oxysterols receptor LXR-beta                                               | NR1H2_HUMAN |
|                             | 3.372 | 0.6743 | 1.0492   | Glutathione S-transferase P                                                | GSTP1_HUMAN |
|                             | 3.715 | 0.5307 | 1.02585  | Lanosterol synthase                                                        | ERG7_HUMAN  |
|                             | 3.538 | 0.7076 | 0.966425 | Tyrosine-protein phosphatase non-receptor type 11                          | PTN11_HUMAN |
|                             | 3.59  | 0.5129 | 0.95564  | Protein farnesyltransferase/geranylgeranyltransferase type-1 subunit alpha | FNTA_HUMAN  |
|                             | 3.37  | 0.6739 | 0.89053  | Methionine aminopeptidase 2                                                | AMPM2_HUMAN |
|                             | 3.679 | 0.4088 | 0.87056  | Cathepsin B                                                                | CATB_HUMAN  |
|                             | 3.734 | 0.6224 | 0.855771 | Alcohol dehydrogenase class-3                                              | ADHX_HUMAN  |
| <b>(-)-Tabernemontanine</b> | 3.697 | 0.6162 | 4.36369  | NONE                                                                       | NONE        |
|                             | 3.609 | 0.7218 | 4.05271  | Basic fibroblast growth factor receptor 1                                  | FGFR1_HUMAN |
|                             | 3.212 | 0.8031 | 3.06226  | Annexin A5                                                                 | ANXA5_HUMAN |
|                             | 3.437 | 0.4297 | 2.44903  | Proto-oncogene tyrosine-protein kinase ABL1                                | P00519      |



|  |       |        |         |                                                 |             |
|--|-------|--------|---------|-------------------------------------------------|-------------|
|  | 3.097 | 0.4424 | 2.40941 | 3-hydroxy-3-methylglutaryl-coenzyme A reductase | HMDH_HUMAN  |
|  | 3.515 | 0.4393 | 2.36502 | Retinoic acid receptor alpha                    | RARA_HUMAN  |
|  | 3.369 | 0.3063 | 2.08293 | Caspase-1                                       | CASP1_HUMAN |
|  | 2.974 | 0.7434 | 2.03611 | Serine/threonine-protein kinase PLK1            | P53350      |
|  | 2.932 | 0.5863 | 1.91071 | Glycogen synthase kinase-3 beta                 | GSK3B_HUMAN |
|  | 3.172 | 0.3172 | 1.78951 | tRNA (cytosine-5-)-methyltransferase            | O14717      |
|  | 2.939 | 0.5877 | 1.76003 | Serine protease hepsin                          | P05981      |
|  | 2.886 | 0.9619 | 1.74899 | P-selectin                                      | LYAM3_HUMAN |
|  | 2.864 | 0.4773 | 1.73929 | B transferase                                   | Q9NY01      |
|  | 2.907 | 0.5814 | 1.73291 | Aldo-keto reductase family 1 member C3          | AK1C3_HUMAN |
|  | 2.873 | 0.5746 | 1.66159 | Neutrophil collagenase                          | MMP8_HUMAN  |
|  | 2.89  | 0.578  | 1.55969 | Macrophage metalloelastase                      | MMP12_HUMAN |
|  | 2.776 | 0.9254 | 1.51656 | Probable ATP-dependent RNA helicase DDX6        | DDX6_HUMAN  |
|  | 2.82  | 0.7049 | 1.45462 | Serine/threonine-protein kinase Chk1            | CHK1_HUMAN  |
|  | 2.804 | 0.9348 | 1.41636 | Cyclin-dependent kinase 5 activator 1           | CD5R1_HUMAN |
|  | 2.886 | 0.4123 | 1.40996 | Baculoviral IAP repeat-containing protein 4     | P98170      |
|  | 2.806 | 0.3507 | 1.40483 | Platelet glycoprotein Ib alpha chain            | P07359      |
|  | 2.892 | 0.482  | 1.39754 | Insulin-like growth factor IA                   | P01343      |
|  | 2.786 | 0.4644 | 1.39573 | Fatty acid-binding protein, adipocyte           | FABP4_HUMAN |
|  | 2.853 | 0.4755 | 1.38995 | Fructose-bisphosphate aldolase A                | ALDOA_HUMAN |
|  | 2.874 | 0.7184 | 1.38206 | Glycine amidinotransferase, mitochondrial       | GATM_HUMAN  |
|  | 2.877 | 0.4796 | 1.36998 | Eosinophil cationic protein                     | P12724      |
|  | 2.845 | 0.4742 | 1.35313 | Baculoviral IAP repeat-                         | Q96CA5      |

|       |        |         |  |                                                       |             |
|-------|--------|---------|--|-------------------------------------------------------|-------------|
|       |        |         |  | containing protein 7                                  |             |
| 2.783 | 0.6957 | 1.33984 |  | Heat shock protein HSP 90-alpha                       | HS90A_HUMAN |
| 3.568 | 0.5098 | 1.29087 |  | Alcohol dehydrogenase class-3                         | ADHX_HUMAN  |
| 3.001 | 0.5002 | 1.28204 |  | Prostatic acid phosphatase                            | PPAP_HUMAN  |
| 2.884 | 0.3204 | 1.27816 |  | Pancreatic alpha-amylase                              | AMYP_HUMAN  |
| 2.805 | 0.4674 | 1.24734 |  | cGMP-specific 3,5-cyclic phosphodiesterase            | PDE5A_HUMAN |
| 2.858 | 0.3573 | 1.24127 |  | Beta-secretase 1                                      | BACE1_HUMAN |
| 2.727 | 0.6817 | 1.20921 |  | Cathepsin B                                           | CATB_HUMAN  |
| 2.82  | 0.564  | 1.18751 |  | Fibroblast growth factor receptor 2                   | P21802      |
| 2.788 | 0.5576 | 1.16331 |  | Androgen receptor                                     | ANDR_HUMAN  |
| 2.81  | 0.562  | 1.14276 |  | Tyrosine-protein kinase SYK                           | KSYK_HUMAN  |
| 2.847 | 0.4067 | 1.14273 |  | Dual specificity protein kinase CLK1                  | CLK1_HUMAN  |
| 2.742 | 0.6856 | 1.12898 |  | Prothrombin                                           | THRB_HUMAN  |
| 2.812 | 0.4017 | 1.11308 |  | ADP-ribosyl cyclase 2                                 | BST1_HUMAN  |
| 2.818 | 0.5636 | 1.09368 |  | cAMP-dependent protein kinase catalytic subunit alpha | P00517      |
| 2.863 | 0.2603 | 1.07583 |  | FK506-binding protein 3                               | FKBP3_HUMAN |
| 2.88  | 0.4115 | 1.06479 |  | Nicotinamide mononucleotide adenylyltransferase 1     | Q9HAN9      |
| 2.857 | 0.4762 | 1.05618 |  | Cytochrome P450 2C9                                   | CP2C9_HUMAN |
| 2.883 | 0.3604 | 1.05617 |  | Peptidyl-prolyl cis-trans isomerase FKBP1A            | FKB1A_HUMAN |
| 2.77  | 0.554  | 1.04743 |  | Cyclin-A2                                             | CCNA2_HUMAN |
| 2.91  | 0.4851 | 1.04409 |  | Ephrin type-B receptor 4                              | EPHB4_HUMAN |

|  |       |        |          |                                                                  |             |
|--|-------|--------|----------|------------------------------------------------------------------|-------------|
|  | 2.737 | 0.6842 | 1.03548  | Caspase-7                                                        | CASP7_HUMAN |
|  | 2.962 | 0.3291 | 1.02864  | Lactoylglutathione lyase                                         | LGUL_HUMAN  |
|  | 2.819 | 0.3132 | 1.01931  | Caspase-3                                                        | CASP3_HUMAN |
|  | 2.774 | 0.5549 | 1.00987  | Lanosterol synthase                                              | ERG7_HUMAN  |
|  | 3.221 | 0.2928 | 1.00402  | Serine/threonine-protein phosphatase PP1-gamma catalytic subunit | P36873      |
|  | 2.741 | 0.6853 | 0.99639  | cAMP-specific 3,5-cyclic phosphodiesterase 4B                    | PDE4B_HUMAN |
|  | 2.8   | 0.56   | 0.968496 | Kinesin-like protein KIF11                                       | KIF11_HUMAN |
|  | 2.723 | 0.3404 | 0.947762 | Phosphatidylinositol 3-kinase regulatory subunit alpha           | P85A_HUMAN  |
|  | 2.815 | 0.4692 | 0.938664 | Insulin-like growth factor 1 receptor                            | IGF1R_HUMAN |
|  | 2.869 | 0.5738 | 0.931797 | Serum albumin                                                    | ALBU_HUMAN  |
|  | 2.759 | 0.5518 | 0.920381 | Epidermal growth factor receptor                                 | EGFR_HUMAN  |
|  | 2.89  | 0.578  | 0.916265 | Corticosteroid 11-beta-dehydrogenase isozyme 1                   | DH11_HUMAN  |
|  | 2.959 | 0.4227 | 0.909112 | B-Raf proto-oncogene serine/threonine-protein kinase             | BRAF1_HUMAN |
|  | 2.707 | 0.3384 | 0.90801  | Coagulation factor XI                                            | FA11_HUMAN  |
|  | 2.708 | 0.4513 | 0.902328 | Alpha-amylase 1                                                  | P04745      |
|  | 2.777 | 0.5554 | 0.867773 | Mitogen-activated protein kinase 14                              | Q16539      |
|  | 2.898 | 0.483  | 0.866525 | Vascular endothelial growth factor receptor 2                    | VGFR2_HUMAN |
|  | 2.881 | 0.3602 | 0.859488 | Chymase                                                          | CMA1_HUMAN  |
|  | 2.737 | 0.6844 | 0.858849 | Kynurenine--oxoglutarate transaminase 1                          | KAT1_HUMAN  |
|  | 2.827 | 0.4038 | 0.854886 | Thymidylate kinase                                               | KTHY_HUMAN  |
|  | 2.765 | 0.395  | 0.853693 | Cathepsin F                                                      | Q9UBX1      |

|                                |       |        |          |                                                                                       |                 |
|--------------------------------|-------|--------|----------|---------------------------------------------------------------------------------------|-----------------|
|                                | 2.904 | 0.4148 | 0.842733 | Serine--pyruvate<br>aminotransferase                                                  | SPYA_HU<br>MAN  |
|                                | 2.712 | 0.5424 | 0.806698 | Phosphatidylinositol-4,5-<br>bisphosphate 3-kinase catalytic<br>subunit gamma isoform | PK3CG_HU<br>MAN |
| <b>(-)-Caryophyllene oxide</b> | 4.355 | 0.6221 | 3.39981  | Glutathione S-transferase P                                                           | GSTP1_HU<br>MAN |
|                                | 3.665 | 0.5236 | 2.46403  | Protein<br>farnesyltransferase/geranylgerany<br>ltransferase type-1 subunit alpha     | FNTA_HU<br>MAN  |
|                                | 3.585 | 0.5976 | 2.27309  | Nuclear receptor subfamily 1<br>group I member 3                                      | NR1I3_HU<br>MAN |
|                                | 3.645 | 0.4557 | 2.16241  | Stromelysin-1                                                                         | MMP3_HU<br>MAN  |
|                                | 4.115 | 0.5144 | 2.06365  | Glucocorticoid receptor                                                               | GCR_HUM<br>AN   |
|                                | 3.564 | 0.5091 | 1.91139  | Retinoic acid receptor gamma                                                          | RARG_HU<br>MAN  |
|                                | 3.429 | 0.4899 | 1.60924  | Peroxisome proliferator-activated<br>receptor gamma                                   | PPARG_HU<br>MAN |
|                                | 3.257 | 0.4071 | 1.48496  | Vitamin D3 receptor                                                                   | VDR_HUM<br>AN   |
|                                | 3.65  | 0.5214 | 1.44     | Sulfotransferase family cytosolic<br>2B member 1                                      | O00204          |
|                                | 3.59  | 0.4487 | 1.37038  | Peptidyl-prolyl cis-trans<br>isomerase FKBP1A                                         | FKB1A_HU<br>MAN |
|                                | 3.539 | 0.5056 | 1.34846  | Estrogen sulfotransferase                                                             | ST1E1_HU<br>MAN |
|                                | 2.997 | 0.9991 | 1.33362  | Aldo-keto reductase family 1<br>member C2                                             | AK1C2_HU<br>MAN |
|                                | 3.201 | 0.5335 | 1.26976  | Oxysterols receptor LXR-beta                                                          | NR1H2_HU<br>MAN |
|                                | 2.998 | 0.9994 | 1.2526   | Integrin alpha-L                                                                      | ITAL_HUM<br>AN  |
|                                | 3.673 | 0.3339 | 1.2146   | Serine/threonine-protein<br>phosphatase PP1-gamma<br>catalytic subunit                | P36873          |
|                                | 3.184 | 0.6367 | 1.20441  | Alpha-tocopherol transfer protein                                                     | P49638          |
|                                | 3.654 | 0.406  | 1.12589  | Retinoic acid receptor beta                                                           | RARB_HU<br>MAN  |
|                                | 2.999 | 0.7497 | 1.07985  | Bile salt sulfotransferase                                                            | Q06520          |

|                      |       |        |          |                                                                                |             |
|----------------------|-------|--------|----------|--------------------------------------------------------------------------------|-------------|
|                      | 3.321 | 0.5534 | 1.06624  | Glutathione-requiring prostaglandin D synthase                                 | PTGD2_HUMAN |
|                      | 3.82  | 0.382  | 1.05081  | Retinoic acid receptor RXR-beta                                                | RXRB_HUMAN  |
|                      | 2.951 | 0.7377 | 1.04907  | Retinoic acid receptor RXR-alpha                                               | RXRA_HUMAN  |
|                      | 2.98  | 0.7451 | 1.04781  | Progesterone receptor                                                          | PRGR_HUMAN  |
|                      | 3.252 | 0.542  | 1.00364  | Glutathione S-transferase A1                                                   | P08263      |
|                      | 2.962 | 0.7404 | 1.0014   | Group 10 secretory phospholipase A2                                            | O15496      |
|                      | 2.987 | 0.7468 | 0.986953 | Estrogen receptor                                                              | ESR1_HUMAN  |
|                      | 2.992 | 0.5983 | 0.977997 | Cell division protein kinase 2                                                 | P24941      |
|                      | 2.957 | 0.7393 | 0.975276 | Sex hormone-binding globulin                                                   | SHBG_HUMAN  |
|                      | 2.966 | 0.7416 | 0.956508 | Estradiol 17-beta-dehydrogenase 1                                              | P14061      |
|                      | 2.955 | 0.5911 | 0.955974 | Estrogen receptor beta                                                         | Q92731      |
|                      | 2.996 | 0.5992 | 0.934575 | Tyrosine-protein phosphatase non-receptor type 1                               | P18031      |
|                      | 2.897 | 0.7243 | 0.888776 | NONE                                                                           | NONE        |
|                      | 2.879 | 0.9598 | 0.878174 | Cytochrome P450 19A1                                                           | P11511      |
|                      | 2.871 | 0.9569 | 0.858466 | Phosphatidylinositol-4,5-bisphosphate 3-kinase catalytic subunit gamma isoform | PK3CG_HUMAN |
|                      | 2.905 | 0.7262 | 0.83293  | Proto-oncogene tyrosine-protein kinase Src                                     | SRC_HUMAN   |
|                      | 2.884 | 0.9614 | 0.821444 | Caspase-7                                                                      | CASP7_HUMAN |
|                      | 3.644 | 0.4049 | 0.814563 | Dual specificity mitogen-activated protein kinase kinase 1                     | MP2K1_HUMAN |
|                      | 2.845 | 0.9483 | 0.811606 | Serum albumin                                                                  | ALBU_HUMAN  |
|                      | 2.969 | 0.7423 | 0.811216 | Transthyretin                                                                  | TTHY_HUMAN  |
| <b>lanost-8-enol</b> | 5.228 | 0.7469 | 3.47996  | Lanosterol synthase                                                            | ERG7_HUMAN  |
|                      | 5.294 | 0.6618 | 3.03785  | Ferrochelatase, mitochondrial                                                  | P22830      |
|                      | 5.082 | 0.7261 | 2.56619  | Gastrotropin                                                                   | FABP6_HUMAN |

|  |       |        |         |                                                        |             |
|--|-------|--------|---------|--------------------------------------------------------|-------------|
|  | 4.587 | 0.7645 | 2.48647 | Trafficking protein particle complex subunit 3         | O43617      |
|  | 4.324 | 0.5405 | 2.48139 | Vitamin D3 receptor                                    | VDR_HUMAN   |
|  | 3.921 | 0.9803 | 2.38681 | Nuclear receptor ROR-alpha                             | RORA_HUMAN  |
|  | 3.954 | 0.9885 | 2.20409 | Transthyretin                                          | TTHY_HUMAN  |
|  | 3.925 | 0.785  | 1.96287 | Bile acid receptor                                     | NR1H4_HUMAN |
|  | 3.787 | 0.6311 | 1.88612 | Ganglioside GM2 activator                              | P17900      |
|  | 3.925 | 0.5607 | 1.77782 | Protein S100-A9                                        | S10A9_HUMAN |
|  | 3.929 | 0.7858 | 1.77064 | Prothrombin                                            | THRB_HUMAN  |
|  | 4.171 | 0.8341 | 1.76913 | SEC14-like protein 2                                   | O76054      |
|  | 3.841 | 0.6402 | 1.68962 | Flavin reductase                                       | P30043      |
|  | 4.453 | 0.6361 | 1.58861 | Sulfotransferase family cytosolic 2B member 1          | O00204      |
|  | 4.128 | 0.5897 | 1.56258 | Cytochrome P450 2C8                                    | CP2C8_HUMAN |
|  | 4.643 | 0.4221 | 1.55167 | Phosphatidylcholine transfer protein                   | Q9UKL6      |
|  | 3.962 | 0.4953 | 1.49543 | Proto-oncogene tyrosine-protein kinase ABL1            | P00519      |
|  | 4.683 | 0.5853 | 1.49501 | Fatty acid-binding protein, heart                      | FABPH_HUMAN |
|  | 3.98  | 0.5686 | 1.47921 | Retinoic acid receptor gamma                           | RARG_HUMAN  |
|  | 3.826 | 0.6376 | 1.45792 | Oxysterols receptor LXR-alpha                          | NR1H3_HUMAN |
|  | 4.965 | 0.4965 | 1.44645 | Retinoic acid receptor RXR-beta                        | RXRB_HUMAN  |
|  | 3.576 | 0.8939 | 1.44613 | Mitogen-activated protein kinase 14                    | Q16539      |
|  | 3.873 | 0.7747 | 1.43166 | Corticosteroid 11-beta-dehydrogenase isozyme 1         | DH11_HUMAN  |
|  | 3.772 | 0.4191 | 1.42517 | Phosphatidylinositol 3-kinase regulatory subunit alpha | P85A_HUMAN  |
|  | 3.735 | 0.747  | 1.42193 | Alpha-tocopherol transfer protein                      | P49638      |
|  | 3.797 | 0.7593 | 1.4151  | Calmodulin                                             | CALM_HUMAN  |

|       |        |         |                                                                  |             |
|-------|--------|---------|------------------------------------------------------------------|-------------|
|       |        |         |                                                                  | MAN         |
| 3.697 | 0.4108 | 1.41227 | Bcl-2-like protein 1                                             | Q07817      |
| 3.62  | 0.7241 | 1.41075 | cAMP-dependent protein kinase catalytic subunit alpha            | P00517      |
| 3.698 | 0.6164 | 1.4002  | Poly [ADP-ribose] polymerase 1                                   | P09874      |
| 4.171 | 0.5959 | 1.39771 | Hepatocyte nuclear factor 4-gamma                                | Q14541      |
| 3.934 | 0.6556 | 1.3961  | Histone deacetylase 8                                            | HDAC8_HUMAN |
| 3.813 | 0.7626 | 1.35507 | Mineralocorticoid receptor                                       | MCR_HUMAN   |
| 3.8   | 0.6333 | 1.35162 | Nuclear receptor subfamily 1 group I member 3                    | NR1I3_HUMAN |
| 3.657 | 0.6095 | 1.34376 | Alpha-1-antitrypsin                                              | A1AT_HUMAN  |
| 3.552 | 0.7103 | 1.33192 | Steroid hormone receptor ERR1                                    | P11474      |
| 4.757 | 0.5285 | 1.29873 | Dual specificity mitogen-activated protein kinase kinase 1       | MP2K1_HUMAN |
| 3.783 | 0.9459 | 1.28948 | Vitamin D-binding protein                                        | VTDB_HUMAN  |
| 3.792 | 0.632  | 1.26786 | Oxysterols receptor LXR-beta                                     | NR1H2_HUMAN |
| 3.864 | 0.6439 | 1.25283 | Glutathione S-transferase A1                                     | P08263      |
| 3.664 | 0.458  | 1.24531 | Heat shock protein HSP 90-beta                                   | P08238      |
| 4.956 | 0.6196 | 1.22453 | Retinol-binding protein 4                                        | RET4_HUMAN  |
| 4.38  | 0.3982 | 1.2096  | Serine/threonine-protein phosphatase PP1-gamma catalytic subunit | P36873      |
| 3.474 | 0.6948 | 1.18938 | Glutathione S-transferase P                                      | GSTP1_HUMAN |
| 3.636 | 0.606  | 1.17214 | Peroxisome proliferator-activated receptor alpha                 | PPARA_HUMAN |
| 3.707 | 0.5296 | 1.17154 | Neutrophil gelatinase-associated lipocalin                       | NGAL_HUMAN  |
| 3.513 | 0.2702 | 1.15369 | Amine oxidase [flavin-containing] A                              | AOFA_HUMAN  |
| 3.687 | 0.5267 | 1.14817 | 72 kDa type IV collagenase                                       | MMP2_HUMAN  |
| 3.526 | 0.5877 | 1.13912 | Serine/threonine-protein kinase Chk1                             | CHK1_HUMAN  |

|                 |       |        |          |                                                                      |             |
|-----------------|-------|--------|----------|----------------------------------------------------------------------|-------------|
|                 | 4.355 | 0.4838 | 1.12678  | Retinoic acid receptor beta                                          | RARB_HUMAN  |
|                 | 3.481 | 0.6962 | 1.06897  | Aldo-keto reductase family 1 member C1                               | Q04828      |
|                 | 3.903 | 0.4337 | 1.04185  | Growth factor receptor-bound protein 2                               | GRB2_HUMAN  |
|                 | 3.632 | 0.7263 | 1.02759  | Tyrosine-protein phosphatase non-receptor type 11                    | PTN11_HUMAN |
|                 | 3.963 | 0.5662 | 1.02131  | Estrogen sulfotransferase                                            | ST1E1_HUMAN |
|                 | 3.278 | 0.8196 | 1.01497  | Androgen receptor                                                    | ANDR_HUMAN  |
|                 | 3.615 | 0.5164 | 1.00858  | Basic fibroblast growth factor receptor 1                            | FGFR1_HUMAN |
|                 | 4.144 | 0.5919 | 1.00048  | Fatty acid-binding protein, brain                                    | FABP7_HUMAN |
|                 | 3.761 | 0.7523 | 0.9565   | Estradiol 17-beta-dehydrogenase 1                                    | P14061      |
|                 | 3.865 | 0.6442 | 0.926928 | Alcohol dehydrogenase class-3                                        | ADHX_HUMAN  |
|                 | 3.605 | 0.7211 | 0.90348  | Wiskott-Aldrich syndrome protein                                     | WASP_HUMAN  |
|                 | 3.645 | 0.6075 | 0.8988   | Tyrosine-protein kinase ITK/TSK                                      | Q08881      |
|                 | 3.732 | 0.622  | 0.891734 | E3 ubiquitin-protein ligase Mdm2                                     | MDM2_HUMAN  |
|                 | 3.369 | 0.5615 | 0.869351 | Histo-blood group ABO system transferase                             | P16442      |
|                 | 3.682 | 0.6136 | 0.839754 | [Pyruvate dehydrogenase [lipoamide]] kinase isozyme 2, mitochondrial | PDK2_HUMAN  |
|                 | 3.694 | 0.5277 | 0.822754 | Protein kinase C theta type                                          | KPCT_HUMAN  |
|                 | 3.69  | 0.615  | 0.818662 | Glutathione-requiring prostaglandin D synthase                       | PTGD2_HUMAN |
|                 | 3.938 | 0.3029 | 0.802891 | Endothelial protein C receptor                                       | EPCR_HUMAN  |
| <b>Lophenol</b> | 3.915 | 0.9786 | 2.61283  | Nuclear receptor ROR-alpha                                           | RORA_HUMAN  |
|                 | 4.408 | 0.8816 | 2.45019  | SEC14-like protein 2                                                 | O76054      |
|                 | 4.411 | 0.7351 | 2.42424  | Trafficking protein particle complex subunit 3                       | O43617      |



|  |       |        |         |                                                            |             |
|--|-------|--------|---------|------------------------------------------------------------|-------------|
|  | 4     | 0.8    | 2.3742  | Vascular endothelial growth factor receptor 2              | P35968      |
|  | 4.386 | 0.8773 | 2.28183 | Estradiol 17-beta-dehydrogenase 1                          | P14061      |
|  | 4.407 | 0.5509 | 2.26239 | Caspase-3                                                  | CASP3_HUMAN |
|  | 3.805 | 0.6341 | 2.13066 | Ganglioside GM2 activator                                  | P17900      |
|  | 4.605 | 0.6579 | 2.02638 | Sulfotransferase family cytosolic 2B member 1              | O00204      |
|  | 3.679 | 0.7358 | 1.9913  | Alcohol dehydrogenase 1C                                   | P00326      |
|  | 3.705 | 0.9262 | 1.95378 | Mineralocorticoid receptor                                 | MCR_HUMAN   |
|  | 4.176 | 0.5966 | 1.87758 | Lanosterol synthase                                        | ERG7_HUMAN  |
|  | 4.173 | 0.5962 | 1.85105 | Cytochrome P450 2C8                                        | CP2C8_HUMAN |
|  | 4.361 | 0.5451 | 1.84924 | Ferrochelatase, mitochondrial                              | P22830      |
|  | 3.711 | 0.7422 | 1.80236 | cAMP-dependent protein kinase catalytic subunit alpha      | P00517      |
|  | 3.658 | 0.9146 | 1.77955 | Progesterone receptor                                      | PRGR_HUMAN  |
|  | 3.811 | 0.4234 | 1.71045 | Phosphatidylinositol 3-kinase regulatory subunit alpha     | P85A_HUMAN  |
|  | 3.767 | 0.7535 | 1.67896 | Androgen receptor                                          | ANDR_HUMAN  |
|  | 3.81  | 0.5443 | 1.67729 | Tyrosine-protein phosphatase non-receptor type 1           | PTN1_HUMAN  |
|  | 3.726 | 0.621  | 1.58504 | Oxysterols receptor LXR-beta                               | NR1H2_HUMAN |
|  | 3.586 | 0.7171 | 1.5497  | Steroid hormone receptor ERR1                              | P11474      |
|  | 4.236 | 0.6052 | 1.50562 | Gastrotropin                                               | FABP6_HUMAN |
|  | 4.761 | 0.529  | 1.50004 | Dual specificity mitogen-activated protein kinase kinase 1 | MP2K1_HUMAN |
|  | 3.604 | 0.7207 | 1.46966 | Aldo-keto reductase family 1 member C1                     | Q04828      |
|  | 3.671 | 0.7343 | 1.45358 | Alpha-tocopherol transfer protein                          | P49638      |
|  | 4.256 | 0.7094 | 1.44996 | Sex hormone-binding globulin                               | SHBG_HUMAN  |
|  | 3.507 | 0.8768 | 1.42047 | Collagenase 3                                              | MMP13_HUMAN |

|  |       |        |          |                                                   |             |
|--|-------|--------|----------|---------------------------------------------------|-------------|
|  | 3.604 | 0.7207 | 1.41824  | Bile acid receptor                                | NR1H4_HUMAN |
|  | 3.509 | 0.5848 | 1.39239  | Renin                                             | RENI_HUMAN  |
|  | 3.719 | 0.9298 | 1.3342   | Vitamin D-binding protein                         | VTDB_HUMAN  |
|  | 4.053 | 0.579  | 1.32983  | Estrogen sulfotransferase                         | ST1E1_HUMAN |
|  | 3.705 | 0.5293 | 1.32242  | 72 kDa type IV collagenase                        | MMP2_HUMAN  |
|  | 4.873 | 0.6092 | 1.32078  | Retinol-binding protein 4                         | RET4_HUMAN  |
|  | 3.983 | 0.5689 | 1.26066  | Hepatocyte nuclear factor 4-gamma                 | Q14541      |
|  | 3.765 | 0.6275 | 1.23094  | Glutathione S-transferase A1                      | P08263      |
|  | 3.693 | 0.5276 | 1.22776  | Interleukin-2                                     | IL2_HUMAN   |
|  | 3.846 | 0.6411 | 1.21481  | Adenosine kinase                                  | P55263      |
|  | 3.583 | 0.5972 | 1.19562  | Receptor tyrosine-protein kinase erbB-4           | ERBB4_HUMAN |
|  | 3.626 | 0.7251 | 1.17887  | Tyrosine-protein phosphatase non-receptor type 11 | PTN11_HUMAN |
|  | 3.457 | 0.2659 | 1.16595  | Amine oxidase [flavin-containing] A               | AOFA_HUMAN  |
|  | 3.708 | 0.5297 | 1.13128  | Retinoic acid receptor gamma                      | RARG_HUMAN  |
|  | 3.295 | 0.8238 | 1.1269   | Troponin C, slow skeletal and cardiac muscles     | P63316      |
|  | 5.777 | 0.5777 | 1.10365  | Cellular retinoic acid-binding protein 2          | P29373      |
|  | 3.8   | 0.76   | 1.07031  | Bile salt sulfotransferase                        | Q06520      |
|  | 4.147 | 0.4147 | 1.06668  | Vitamin D3 receptor                               | VDR_HUMAN   |
|  | 3.571 | 0.5101 | 1.043    | Macrophage metalloelastase                        | MMP12_HUMAN |
|  | 3.691 | 0.4614 | 1.01375  | Proto-oncogene tyrosine-protein kinase ABL1       | P00519      |
|  | 3.589 | 0.7179 | 0.999792 | Corticosteroid 11-beta-dehydrogenase isozyme 1    | DH11_HUMAN  |
|  | 4.122 | 0.458  | 0.976261 | Retinoic acid receptor beta                       | RARB_HUMAN  |

|  |       |        |          |                                                |             |
|--|-------|--------|----------|------------------------------------------------|-------------|
|  | 3.796 | 0.6327 | 0.963583 | Alcohol dehydrogenase class-3                  | ADHX_HUMAN  |
|  | 3.884 | 0.5549 | 0.955001 | Mitogen-activated protein kinase 10            | MK10_HUMAN  |
|  | 3.321 | 0.6642 | 0.938033 | Prothrombin                                    | THRB_HUMAN  |
|  | 3.671 | 0.6119 | 0.919301 | Glutathione-requiring prostaglandin D synthase | PTGD2_HUMAN |
|  | 3.887 | 0.299  | 0.874417 | Endothelial protein C receptor                 | EPCR_HUMAN  |
|  | 3.797 | 0.7594 | 0.871199 | S-methyl-5-thioadenosine phosphorylase         | Q13126      |
|  | 3.585 | 0.5122 | 0.867959 | Tyrosine-protein kinase ZAP-70                 | ZAP70_HUMAN |
|  | 3.46  | 0.5767 | 0.817229 | Oxysterols receptor LXR-alpha                  | NR1H3_HUMAN |

**Table S3 Target proteins' corresponding pathways predicted by KEGG and PubMed**

|                                                                                  |
|----------------------------------------------------------------------------------|
| hsa01100 Metabolic pathways - Homo sapiens (human) (23)                          |
| hsa05200 Pathways in cancer - Homo sapiens (human) (13)                          |
| hsa04151 PI3K-Akt signaling pathway - Homo sapiens (human) (11)                  |
| hsa04014 Ras signaling pathway - Homo sapiens (human) (9)                        |
| hsa04068 FoxO signaling pathway - Homo sapiens (human) (7)                       |
| hsa04914 Progesterone-mediated oocyte maturation - Homo sapiens (human) (7)      |
| hsa04510 Focal adhesion - Homo sapiens (human) (7)                               |
| hsa01521 EGFR tyrosine kinase inhibitor resistance - Homo sapiens (human) (7)    |
| hsa04910 Insulin signaling pathway - Homo sapiens (human) (6)                    |
| hsa05418 Fluid shear stress and atherosclerosis - Homo sapiens (human) (6)       |
| hsa04010 MAPK signaling pathway - Homo sapiens (human) (6)                       |
| hsa05145 Toxoplasmosis - Homo sapiens (human) (6)                                |
| hsa00980 Metabolism of xenobiotics by cytochrome P450 - Homo sapiens (human) (6) |
| hsa04110 Cell cycle - Homo sapiens (human) (5)                                   |
| hsa04210 Apoptosis - Homo sapiens (human) (5)                                    |
| hsa04114 Oocyte meiosis - Homo sapiens (human) (5)                               |
| hsa05205 Proteoglycans in cancer - Homo sapiens (human) (5)                      |
| hsa00270 Cysteine and methionine metabolism - Homo sapiens (human) (5)           |
| hsa04217 Necroptosis - Homo sapiens (human) (5)                                  |
| hsa05203 Viral carcinogenesis - Homo sapiens (human) (5)                         |

|                                                                                                |
|------------------------------------------------------------------------------------------------|
| hsa04621 NOD-like receptor signaling pathway - Homo sapiens (human) (5)                        |
| hsa05204 Chemical carcinogenesis - Homo sapiens (human) (5)                                    |
| hsa04919 Thyroid hormone signaling pathway - Homo sapiens (human) (5)                          |
| hsa00140 Steroid hormone biosynthesis - Homo sapiens (human) (5)                               |
| hsa04015 Rap1 signaling pathway - Homo sapiens (human) (5)                                     |
| hsa05222 Small cell lung cancer - Homo sapiens (human) (5)                                     |
| hsa04722 Neurotrophin signaling pathway - Homo sapiens (human) (5)                             |
| hsa05215 Prostate cancer - Homo sapiens (human) (5)                                            |
| hsa04931 Insulin resistance - Homo sapiens (human) (5)                                         |
| hsa05169 Epstein-Barr virus infection - Homo sapiens (human) (5)                               |
| hsa05166 HTLV-I infection - Homo sapiens (human) (4)                                           |
| hsa05160 Hepatitis C - Homo sapiens (human) (4)                                                |
| hsa04215 Apoptosis - multiple species - Homo sapiens (human) (4)                               |
| hsa04657 IL-17 signaling pathway - Homo sapiens (human) (4)                                    |
| hsa05167 Kaposi's sarcoma-associated herpesvirus infection - Homo sapiens (human) (4)          |
| hsa04917 Prolactin signaling pathway - Homo sapiens (human) (4)                                |
| hsa04141 Protein processing in endoplasmic reticulum - Homo sapiens (human) (4)                |
| hsa01524 Platinum drug resistance - Homo sapiens (human) (4)                                   |
| hsa04728 Dopaminergic synapse - Homo sapiens (human) (4)                                       |
| hsa05202 Transcriptional misregulation in cancer - Homo sapiens (human) (4)                    |
| hsa04550 Signaling pathways regulating pluripotency of stem cells - Homo sapiens (human) (4)   |
| hsa05164 Influenza A - Homo sapiens (human) (4)                                                |
| hsa04659 Th17 cell differentiation - Homo sapiens (human) (4)                                  |
| hsa04218 Cellular senescence - Homo sapiens (human) (4)                                        |
| hsa01522 Endocrine resistance - Homo sapiens (human) (4)                                       |
| hsa04144 Endocytosis - Homo sapiens (human) (3)                                                |
| hsa04660 T cell receptor signaling pathway - Homo sapiens (human) (3)                          |
| hsa05120 Epithelial cell signaling in Helicobacter pylori infection - Homo sapiens (human) (3) |
| hsa04370 VEGF signaling pathway - Homo sapiens (human) (3)                                     |
| hsa04360 Axon guidance - Homo sapiens (human) (3)                                              |
| hsa04261 Adrenergic signaling in cardiomyocytes - Homo sapiens (human) (3)                     |
| hsa05162 Measles - Homo sapiens (human) (3)                                                    |
| hsa04150 mTOR signaling pathway - Homo sapiens (human) (3)                                     |
| hsa05168 Herpes simplex infection - Homo sapiens (human) (3)                                   |
| hsa03320 PPAR signaling pathway - Homo sapiens (human) (3)                                     |
| hsa04064 NF-kappa B signaling pathway - Homo sapiens (human) (3)                               |
| hsa04213 Longevity regulating pathway - multiple species - Homo sapiens (human) (3)            |
| hsa05206 MicroRNAs in cancer - Homo sapiens (human) (3)                                        |
| hsa00480 Glutathione metabolism - Homo sapiens (human) (3)                                     |

|                                                                                          |
|------------------------------------------------------------------------------------------|
| hsa04976 Bile secretion - Homo sapiens (human) (3)                                       |
| hsa01230 Biosynthesis of amino acids - Homo sapiens (human) (3)                          |
| hsa04611 Platelet activation - Homo sapiens (human) (3)                                  |
| hsa04211 Longevity regulating pathway - Homo sapiens (human) (3)                         |
| hsa00260 Glycine, serine and threonine metabolism - Homo sapiens (human) (3)             |
| hsa05224 Breast cancer - Homo sapiens (human) (3)                                        |
| hsa04932 Non-alcoholic fatty liver disease (NAFLD) - Homo sapiens (human) (3)            |
| hsa04140 Autophagy - animal - Homo sapiens (human) (3)                                   |
| hsa04920 Adipocytokine signaling pathway - Homo sapiens (human) (3)                      |
| hsa00982 Drug metabolism - cytochrome P450 - Homo sapiens (human) (3)                    |
| hsa04933 AGE-RAGE signaling pathway in diabetic complications - Homo sapiens (human) (3) |
| hsa04913 Ovarian steroidogenesis - Homo sapiens (human) (3)                              |
| hsa04310 Wnt signaling pathway - Homo sapiens (human) (3)                                |
| hsa04750 Inflammatory mediator regulation of TRP channels - Homo sapiens (human) (3)     |
| hsa04142 Lysosome - Homo sapiens (human) (3)                                             |
| hsa04012 ErbB signaling pathway - Homo sapiens (human) (3)                               |
| hsa04915 Estrogen signaling pathway - Homo sapiens (human) (3)                           |
| hsa04520 Adherens junction - Homo sapiens (human) (3)                                    |
| hsa04270 Vascular smooth muscle contraction - Homo sapiens (human) (3)                   |
| hsa05131 Shigellosis - Homo sapiens (human) (3)                                          |
| hsa05165 Human papillomavirus infection - Homo sapiens (human) (3)                       |
| hsa05221 Acute myeloid leukemia - Homo sapiens (human) (2)                               |
| hsa05010 Alzheimer's disease - Homo sapiens (human) (2)                                  |
| hsa04024 cAMP signaling pathway - Homo sapiens (human) (2)                               |
| hsa04912 GnRH signaling pathway - Homo sapiens (human) (2)                               |
| hsa05034 Alcoholism - Homo sapiens (human) (2)                                           |
| hsa04062 Chemokine signaling pathway - Homo sapiens (human) (2)                          |
| hsa04668 TNF signaling pathway - Homo sapiens (human) (2)                                |
| hsa04390 Hippo signaling pathway - Homo sapiens (human) (2)                              |
| hsa04152 AMPK signaling pathway - Homo sapiens (human) (2)                               |
| hsa05132 Salmonella infection - Homo sapiens (human) (2)                                 |
| hsa00591 Linoleic acid metabolism - Homo sapiens (human) (2)                             |
| hsa00565 Ether lipid metabolism - Homo sapiens (human) (2)                               |
| hsa04080 Neuroactive ligand-receptor interaction - Homo sapiens (human) (2)              |
| hsa05212 Pancreatic cancer - Homo sapiens (human) (2)                                    |
| hsa04723 Retrograde endocannabinoid signaling - Homo sapiens (human) (2)                 |
| hsa04620 Toll-like receptor signaling pathway - Homo sapiens (human) (2)                 |
| hsa00860 Porphyrin and chlorophyll metabolism - Homo sapiens (human) (2)                 |
| hsa04060 Cytokine-cytokine receptor interaction - Homo sapiens (human) (2)               |

|                                                                               |
|-------------------------------------------------------------------------------|
| hsa04071 Sphingolipid signaling pathway - Homo sapiens (human) (2)            |
| hsa04120 Ubiquitin mediated proteolysis - Homo sapiens (human) (2)            |
| hsa05133 Pertussis - Homo sapiens (human) (2)                                 |
| hsa04380 Osteoclast differentiation - Homo sapiens (human) (2)                |
| hsa00230 Purine metabolism - Homo sapiens (human) (2)                         |
| hsa00590 Arachidonic acid metabolism - Homo sapiens (human) (2)               |
| hsa04630 Jak-STAT signaling pathway - Homo sapiens (human) (2)                |
| hsa04137 Mitophagy - animal - Homo sapiens (human) (2)                        |
| hsa00592 alpha-Linolenic acid metabolism - Homo sapiens (human) (2)           |
| hsa00760 Nicotinate and nicotinamide metabolism - Homo sapiens (human) (2)    |
| hsa00010 Glycolysis / Gluconeogenesis - Homo sapiens (human) (2)              |
| hsa05161 Hepatitis B - Homo sapiens (human) (2)                               |
| hsa04972 Pancreatic secretion - Homo sapiens (human) (2)                      |
| hsa00071 Fatty acid degradation - Homo sapiens (human) (2)                    |
| hsa00564 Glycerophospholipid metabolism - Homo sapiens (human) (2)            |
| hsa05220 Chronic myeloid leukemia - Homo sapiens (human) (2)                  |
| hsa04658 Th1 and Th2 cell differentiation - Homo sapiens (human) (2)          |
| hsa04664 Fc epsilon RI signaling pathway - Homo sapiens (human) (2)           |
| hsa04670 Leukocyte transendothelial migration - Homo sapiens (human) (2)      |
| hsa04975 Fat digestion and absorption - Homo sapiens (human) (2)              |
| hsa05142 Chagas disease (American trypanosomiasis) - Homo sapiens (human) (2) |
| hsa05152 Tuberculosis - Homo sapiens (human) (2)                              |
| hsa05014 Amyotrophic lateral sclerosis (ALS) - Homo sapiens (human) (2)       |
| hsa04066 HIF-1 signaling pathway - Homo sapiens (human) (2)                   |
| hsa05210 Colorectal cancer - Homo sapiens (human) (2)                         |
| hsa04926 Relaxin signaling pathway - Homo sapiens (human) (2)                 |
| hsa05230 Central carbon metabolism in cancer - Homo sapiens (human) (2)       |
| hsa04810 Regulation of actin cytoskeleton - Homo sapiens (human) (2)          |
| hsa05218 Melanoma - Homo sapiens (human) (2)                                  |
| hsa04612 Antigen processing and presentation - Homo sapiens (human) (2)       |
| hsa04622 RIG-I-like receptor signaling pathway - Homo sapiens (human) (2)     |
| hsa00380 Tryptophan metabolism - Homo sapiens (human) (1)                     |
| hsa05211 Renal cell carcinoma - Homo sapiens (human) (1)                      |
| hsa00500 Starch and sucrose metabolism - Homo sapiens (human) (1)             |
| hsa04115 p53 signaling pathway - Homo sapiens (human) (1)                     |
| hsa00350 Tyrosine metabolism - Homo sapiens (human) (1)                       |
| hsa04260 Cardiac muscle contraction - Homo sapiens (human) (1)                |
| hsa04950 Maturity onset diabetes of the young - Homo sapiens (human) (1)      |
| hsa04640 Hematopoietic cell lineage - Homo sapiens (human) (1)                |

|                                                                                                |
|------------------------------------------------------------------------------------------------|
| hsa05146 Amoebiasis - Homo sapiens (human) (1)                                                 |
| hsa05016 Huntington's disease - Homo sapiens (human) (1)                                       |
| hsa00220 Arginine biosynthesis - Homo sapiens (human) (1)                                      |
| hsa00534 Glycosaminoglycan biosynthesis - heparan sulfate / heparin - Homo sapiens (human) (1) |
| hsa00970 Aminoacyl-tRNA biosynthesis - Homo sapiens (human) (1)                                |
| hsa04020 Calcium signaling pathway - Homo sapiens (human) (1)                                  |
| hsa04964 Proximal tubule bicarbonate reclamation - Homo sapiens (human) (1)                    |
| hsa01200 Carbon metabolism - Homo sapiens (human) (1)                                          |
| hsa04610 Complement and coagulation cascades - Homo sapiens (human) (1)                        |
| hsa00330 Arginine and proline metabolism - Homo sapiens (human) (1)                            |
| hsa05144 Malaria - Homo sapiens (human) (1)                                                    |
| hsa00650 Butanoate metabolism - Homo sapiens (human) (1)                                       |
| hsa00020 Citrate cycle (TCA cycle) - Homo sapiens (human) (1)                                  |
| hsa03040 Spliceosome - Homo sapiens (human) (1)                                                |
| hsa05100 Bacterial invasion of epithelial cells - Homo sapiens (human) (1)                     |
| hsa05214 Glioma - Homo sapiens (human) (1)                                                     |
| hsa04340 Hedgehog signaling pathway - Homo sapiens (human) (1)                                 |
| hsa00340 Histidine metabolism - Homo sapiens (human) (1)                                       |
| hsa00290 Valine, leucine and isoleucine biosynthesis - Homo sapiens (human) (1)                |
| hsa05020 Prion diseases - Homo sapiens (human) (1)                                             |
| hsa05213 Endometrial cancer - Homo sapiens (human) (1)                                         |
| hsa04930 Type II diabetes mellitus - Homo sapiens (human) (1)                                  |
| hsa03420 Nucleotide excision repair - Homo sapiens (human) (1)                                 |
| hsa00510 N-Glycan biosynthesis - Homo sapiens (human) (1)                                      |
| hsa00620 Pyruvate metabolism - Homo sapiens (human) (1)                                        |
| hsa04916 Melanogenesis - Homo sapiens (human) (1)                                              |
| hsa00062 Fatty acid elongation - Homo sapiens (human) (1)                                      |
| hsa05134 Legionellosis - Homo sapiens (human) (1)                                              |
| hsa04530 Tight junction - Homo sapiens (human) (1)                                             |
| hsa03022 Basal transcription factors - Homo sapiens (human) (1)                                |
| hsa05140 Leishmaniasis - Homo sapiens (human) (1)                                              |
| hsa04720 Long-term potentiation - Homo sapiens (human) (1)                                     |
| hsa04662 B cell receptor signaling pathway - Homo sapiens (human) (1)                          |
| hsa05130 Pathogenic Escherichia coli infection - Homo sapiens (human) (1)                      |
| hsa03410 Base excision repair - Homo sapiens (human) (1)                                       |
| hsa00740 Riboflavin metabolism - Homo sapiens (human) (1)                                      |
| hsa05223 Non-small cell lung cancer - Homo sapiens (human) (1)                                 |
| hsa04512 ECM-receptor interaction - Homo sapiens (human) (1)                                   |
| hsa04922 Glucagon signaling pathway - Homo sapiens (human) (1)                                 |

|                                                                                                |
|------------------------------------------------------------------------------------------------|
| hsa00410 beta-Alanine metabolism - Homo sapiens (human) (1)                                    |
| hsa05414 Dilated cardiomyopathy (DCM) - Homo sapiens (human) (1)                               |
| hsa05031 Amphetamine addiction - Homo sapiens (human) (1)                                      |
| hsa00280 Valine, leucine and isoleucine degradation - Homo sapiens (human) (1)                 |
| hsa00240 Pyrimidine metabolism - Homo sapiens (human) (1)                                      |
| hsa04921 Oxytocin signaling pathway - Homo sapiens (human) (1)                                 |
| hsa04022 cGMP-PKG signaling pathway - Homo sapiens (human) (1)                                 |
| hsa04970 Salivary secretion - Homo sapiens (human) (1)                                         |
| hsa00310 Lysine degradation - Homo sapiens (human) (1)                                         |
| hsa05231 Choline metabolism in cancer - Homo sapiens (human) (1)                               |
| hsa03015 mRNA surveillance pathway - Homo sapiens (human) (1)                                  |
| hsa05216 Thyroid cancer - Homo sapiens (human) (1)                                             |
| hsa05310 Asthma - Homo sapiens (human) (1)                                                     |
| hsa00601 Glycosphingolipid biosynthesis - lacto and neolacto series - Homo sapiens (human) (1) |
| hsa05416 Viral myocarditis - Homo sapiens (human) (1)                                          |
| hsa04730 Long-term depression - Homo sapiens (human) (1)                                       |
| hsa05217 Basal cell carcinoma - Homo sapiens (human) (1)                                       |
| hsa00830 Retinol metabolism - Homo sapiens (human) (1)                                         |
| hsa03013 RNA transport - Homo sapiens (human) (1)                                              |
| hsa01212 Fatty acid metabolism - Homo sapiens (human) (1)                                      |
| hsa04973 Carbohydrate digestion and absorption - Homo sapiens (human) (1)                      |
| hsa04146 Peroxisome - Homo sapiens (human) (1)                                                 |
| hsa05322 Systemic lupus erythematosus - Homo sapiens (human) (1)                               |
| hsa05410 Hypertrophic cardiomyopathy (HCM) - Homo sapiens (human) (1)                          |
| hsa04330 Notch signaling pathway - Homo sapiens (human) (1)                                    |
| Androgen receptor                                                                              |
| cAMP-specific 3,5-cyclic phosphodiesterase 4D                                                  |
| Cholinergic synapse                                                                            |
| Endocrine and other factor-regulated calcium reabsorption                                      |
| Estrogen-related receptor gamma,testis isoform                                                 |
| Fatty acid biosynthesis                                                                        |
| GABAergic synapse                                                                              |
| Glyoxylate and dicarboxylate metabolism                                                        |
| Neuroactive ligand-receptor interaction                                                        |
| Regulation of lipolysis in adipocytes                                                          |
| Renin secretion                                                                                |
| Secondary bile acid biosynthesis                                                               |
| Serotonergic synapse                                                                           |
| Thyroid hormone synthesis                                                                      |



|                                                     |
|-----------------------------------------------------|
| Vasopressin-regulated water reabsorption            |
| Alanine,aspartate and glutamate metabolism          |
| Nitrogen metabolism                                 |
| Pantothenate and CoA biosynthesis                   |
| Phenylalanine, tyrosine and tryptophan biosynthesis |
| Primary bile acid biosynthesis                      |
| Purine metabolism                                   |
| Taurine and hypotaurine metabolism                  |
| glycerolipid metabolism                             |
| glycolysis or gluconeogenesis                       |
| phenylalanine, tyrosine and tryptophan biosynthesis |
| Phenylalanine metabolism                            |
| Biosynthesis of unsaturated fatty                   |
| Sphingophosphlipid metabolism                       |
| phosphatidylcholine biosynthesis                    |
| Superpathway of methionine degradation              |
| serotonin receptor signalling                       |
| pruine nucleotides de novo biosynthesis II          |
| tyrosine synthesis                                  |

**Table S4 Herb-active compound-target protein-pathway network of YGP-treated KYDS rats**

| Herb                                          | Target proteins' number | Active compound          | Target proteins in KEGG                                                  | Target proteins in YGP                      | Uniprot ID | Pathway                                                                         |
|-----------------------------------------------|-------------------------|--------------------------|--------------------------------------------------------------------------|---------------------------------------------|------------|---------------------------------------------------------------------------------|
| <i>FZ (Radix Aconiti Lateralis Preparata)</i> | 6                       | 11,14-eicosadienoic acid | L-serine/L-threonine ammonia-lyase<br>[EC:4.3.1.17 4.3.1.19]             | L-serine dehydratase                        | P20132     | hsa00260 Glycine, serine and threonine metabolism - Homo sapiens (human) (2)    |
|                                               |                         |                          | <a href="#">betaine-homocysteine S-methyltransferase</a><br>[EC:2.1.1.5] | Betaine--homocysteine S-methyltransferase 1 | Q93088     |                                                                                 |
|                                               |                         |                          | alcohol dehydrogenase 1/7<br>[EC:1.1.1.1]                                | Alcohol dehydrogenase 1C                    | P00326     | hsa00010 Glycolysis / Gluconeogenesis - Homo sapiens (human) (1)                |
|                                               |                         |                          | L-serine/L-threonine ammonia-lyase<br>[EC:4.3.1.17 4.3.1.19]             | L-serine dehydratase                        | P20132     | hsa00290 Valine, leucine and isoleucine biosynthesis - Homo sapiens (human) (1) |

|                                          |   |                                                    |                                                              |                                                    |                                                          |                                                                                 |        |                                                                              |
|------------------------------------------|---|----------------------------------------------------|--------------------------------------------------------------|----------------------------------------------------|----------------------------------------------------------|---------------------------------------------------------------------------------|--------|------------------------------------------------------------------------------|
|                                          |   | Karanjin                                           | cystathionine beta-synthase<br>[EC:4.2.1.22]                 | Cystathionine beta-synthase                        | P35520                                                   | hsa00260 Glycine, serine and threonine metabolism - Homo sapiens (human) (2)    |        |                                                                              |
|                                          |   |                                                    | betaine-homocysteine S-methyltransferase<br>[EC:2.1.1.5]     | Betaine-homocysteine S-methyltransferase 1         | Q93088                                                   |                                                                                 |        |                                                                              |
| <b>SY</b><br><i>(Rhizoma Dioscoreae)</i> | 9 | 24-Methylcholest-5-enyl-3beta-O-glucopyranoside_qt | L-serine/L-threonine ammonia-lyase<br>[EC:4.3.1.17 4.3.1.19] | L-serine dehydratase                               | P20132                                                   | hsa00260 Glycine, serine and threonine metabolism - Homo sapiens (human) (2)    |        |                                                                              |
|                                          |   |                                                    | betaine-homocysteine S-methyltransferase<br>[EC:2.1.1.5]     | Betaine-homocysteine S-methyltransferase 1         | Q93088                                                   |                                                                                 |        |                                                                              |
|                                          |   |                                                    | L-serine/L-threonine ammonia-lyase<br>[EC:4.3.1.17 4.3.1.19] | L-serine dehydratase                               | P20132                                                   | hsa00290 Valine, leucine and isoleucine biosynthesis - Homo sapiens (human) (1) |        |                                                                              |
|                                          |   |                                                    | alcohol dehydrogenase 1/7<br>[EC:1.1.1.1]                    | Alcohol dehydrogenase 1C                           | P00326                                                   | hsa00010 Glycolysis / Gluconeogenesis - Homo sapiens (human) (1)                |        |                                                                              |
|                                          |   | Denudatin B                                        | phosphoenolpyruvate carboxykinase (GTP)<br>[EC:4.1.1.32]     | Phosphoenolpyruvate carboxykinase, cytosolic [GTP] | ADHX_HUMAN                                               | hsa00010 Glycolysis / Gluconeogenesis - Homo sapiens (human) (1)                |        |                                                                              |
|                                          |   |                                                    | phosphoenolpyruvate carboxykinase (GTP)<br>[EC:4.1.1.32]     | Phosphoenolpyruvate carboxykinase, cytosolic [GTP] | P35558                                                   | hsa00620 Pyruvate metabolism - Homo sapiens (human) (1)                         |        |                                                                              |
|                                          |   | Kadsurenone                                        | phosphoenolpyruvate carboxykinase (GTP)<br>[EC:4.1.1.32]     | Phosphoenolpyruvate carboxykinase, cytosolic [GTP] | P35558                                                   | hsa00620 Pyruvate metabolism - Homo sapiens (human) (1)                         |        |                                                                              |
|                                          |   |                                                    | betaine-homocysteine S-methyltransferase<br>[EC:2.1.1.5]     | Betaine-homocysteine S-methyltransferase 1         | Q93088                                                   | hsa00260 Glycine, serine and threonine metabolism - Homo sapiens (human) (1)    |        |                                                                              |
|                                          |   |                                                    | phosphoenolpyruvate carboxykinase (GTP)<br>[EC:4.1.1.32]     | Phosphoenolpyruvate carboxykinase, cytosolic [GTP] | ADHX_HUMAN                                               | hsa00010 Glycolysis / Gluconeogenesis - Homo sapiens (human) (1)                |        |                                                                              |
|                                          |   | <b>SZY</b><br><i>(Macroparpium Officinale)</i>     | 6                                                            | Ethyl oleate (NF)                                  | betaine-homocysteine S-methyltransferase<br>[EC:2.1.1.5] | Betaine-homocysteine S-methyltransferase 1                                      | Q93088 | hsa00260 Glycine, serine and threonine metabolism - Homo sapiens (human) (1) |
|                                          |   |                                                    |                                                              |                                                    | phosphoenolpyruvate carboxykinase (GTP)                  | Phosphoenolpyruvate carboxykinase, cytosolic                                    | P35558 | hsa00620 Pyruvate metabolism - Homo sapiens (human) (1)                      |

|                                    |    |                                      |                                                          |                                                       |                |                                                                              |
|------------------------------------|----|--------------------------------------|----------------------------------------------------------|-------------------------------------------------------|----------------|------------------------------------------------------------------------------|
|                                    |    |                                      | [EC:4.1.1.32]                                            | [GTP]                                                 |                | sapiens (human) (1)                                                          |
|                                    |    |                                      | phosphoenolpyruvate carboxykinase (GTP)<br>[EC:4.1.1.32] | Phosphoenolpyruvate carboxykinase, cytosolic<br>[GTP] | ADHX_HU<br>MAN | hsa00010 Glycolysis / Gluconeogenesis - Homo sapiens (human) (1)             |
|                                    |    | Mandenol                             | phosphoenolpyruvate carboxykinase (GTP)<br>[EC:4.1.1.32] | Phosphoenolpyruvate carboxykinase, cytosolic<br>[GTP] | P35558         | hsa00620 Pyruvate metabolism - Homo sapiens (human) (1)                      |
|                                    |    |                                      | phosphoenolpyruvate carboxykinase (GTP)<br>[EC:4.1.1.32] | Phosphoenolpyruvate carboxykinase, cytosolic<br>[GTP] | ADHX_HU<br>MAN | hsa00010 Glycolysis / Gluconeogenesis - Homo sapiens (human) (1)             |
|                                    |    | Tetrahydroalstonine                  | betaine-homocysteine S-methyltransferase<br>[EC:2.1.1.5] | Betaine-homocysteine S-methyltransferase 1            | Q93088         | hsa00260 Glycine, serine and threonine metabolism - Homo sapiens (human) (1) |
| <b>GQ (<i>Lycium Barbarum</i>)</b> | 15 | (E,E)-1-ethyl octadeca-3,13-dienoate | alcohol dehydrogenase 1/7<br>[EC:1.1.1.1]                | Alcohol dehydrogenase class-3                         | ADHX_HU<br>MAN | hsa00010 Glycolysis / Gluconeogenesis - Homo sapiens (human) (1)             |
|                                    |    |                                      | betaine-homocysteine S-methyltransferase<br>[EC:2.1.1.5] | Betaine-homocysteine S-methyltransferase 1            | Q93088         | hsa00260 Glycine, serine and threonine metabolism - Homo sapiens (human) (1) |
|                                    |    | Atropine                             | betaine-homocysteine S-methyltransferase<br>[EC:2.1.1.5] | Betaine-homocysteine S-methyltransferase 1            | Q93088         | hsa00260 Glycine, serine and threonine metabolism - Homo sapiens (human) (1) |
|                                    |    |                                      | phosphoenolpyruvate carboxykinase (GTP)<br>[EC:4.1.1.32] | Phosphoenolpyruvate carboxykinase, cytosolic<br>[GTP] | P35558         | hsa00620 Pyruvate metabolism - Homo sapiens (human) (1)                      |
|                                    |    |                                      | phosphoenolpyruvate carboxykinase (GTP)<br>[EC:4.1.1.32] | Phosphoenolpyruvate carboxykinase, cytosolic<br>[GTP] | P00326         | hsa00010 Glycolysis / Gluconeogenesis - Homo sapiens (human) (1)             |
|                                    |    |                                      | spermidine synthase<br>[EC:2.5.1.16]                     | Spermidine synthase                                   | P19623         | hsa00330 Arginine and proline metabolism - Homo sapiens (human) (1)          |
|                                    |    | Mandenol                             | phosphoenolpyruvate carboxykinase (GTP)<br>[EC:4.1.1.32] | Phosphoenolpyruvate carboxykinase, cytosolic<br>[GTP] | P35558         | hsa00620 Pyruvate metabolism - Homo sapiens (human) (1)                      |

|                                                                    |   |                                                |                                                             |                                                          |                |                                                                                       |
|--------------------------------------------------------------------|---|------------------------------------------------|-------------------------------------------------------------|----------------------------------------------------------|----------------|---------------------------------------------------------------------------------------|
|                                                                    |   |                                                | phosphoenolpyruvate<br>carboxykinase (GTP)<br>[EC:4.1.1.32] | Phosphoenolpyruvate<br>carboxykinase, cytosolic<br>[GTP] | ADHX_HU<br>MAN | hsa00010 Glycolysis /<br>Gluconeogenesis -<br>Homo sapiens<br>(human) (1)             |
|                                                                    |   | 4alpha,24-<br>dimethylcholesta-7,24-<br>dienol | alcohol dehydrogenase 1/7<br>[EC:1.1.1.1]                   | Alcohol dehydrogenase 1C                                 | P00326         | hsa00010 Glycolysis /<br>Gluconeogenesis -<br>Homo sapiens<br>(human) (1)             |
|                                                                    |   | 4alpha-methyl-24-<br>ethylcholesta-7,24-dienol | alcohol dehydrogenase 1/7<br>[EC:1.1.1.1]                   | Alcohol dehydrogenase 1C                                 | P00326         | hsa00010 Glycolysis /<br>Gluconeogenesis -<br>Homo sapiens<br>(human) (1)             |
|                                                                    |   | 24-methylidenelphenol                          | alcohol dehydrogenase 1/7<br>[EC:1.1.1.1]                   | Alcohol dehydrogenase<br>class-3                         | ADHX_HU<br>MAN | hsa00010 Glycolysis /<br>Gluconeogenesis -<br>Homo sapiens<br>(human) (1)             |
|                                                                    |   | Obtusifoliol                                   | alcohol dehydrogenase 1/7<br>[EC:1.1.1.1]                   | Alcohol dehydrogenase 1C                                 | P00326         | hsa00010 Glycolysis /<br>Gluconeogenesis -<br>Homo sapiens<br>(human) (1)             |
|                                                                    |   | Lophenol                                       | alcohol dehydrogenase 1/7<br>[EC:1.1.1.1]                   | Alcohol dehydrogenase 1C                                 | P00326         | hsa00010 Glycolysis /<br>Gluconeogenesis -<br>Homo sapiens<br>(human) (1)             |
|                                                                    |   | Sitosterol alpha1                              | alcohol dehydrogenase 1/7<br>[EC:1.1.1.1]                   | Alcohol dehydrogenase<br>class-3                         | ADHX_HU<br>MAN | hsa00010 Glycolysis /<br>Gluconeogenesis -<br>Homo sapiens<br>(human) (1)             |
|                                                                    |   | betaine                                        | cystathionine beta-synthase<br>[EC:4.2.1.22]                | Cystathionine beta-<br>synthase                          | P35520         | hsa00260 Glycine,<br>serine and threonine<br>metabolism - Homo<br>sapiens (human) (1) |
| <b>RG</b><br><i>(Cinnamomi<br/>cortex)</i>                         | 1 | Styrone                                        | tyrosyl-tRNA synthetase<br>[EC:6.1.1.1]                     | Tyrosyl-tRNA synthetase,<br>cytoplasmic                  | P54577         | hsa00970 Aminoacyl-<br>tRNA biosynthesis -<br>Homo sapiens<br>(human) (1)             |
| _qt: the residue of saccharide after desaccharify (i.e., aglycone) |   |                                                |                                                             |                                                          |                |                                                                                       |
